# Supplementary material for: The effects of anti-inflammatory agents as host-directed adjunct treatment of tuberculosis in humans: a systematic review and meta-analysis
Source: Springer Nature journal article supplement (doi:10.1186/s12931-020-01488-9), 2020-08-26
Supplement: MOESM1 [file 18317626]

1: Singh B, Cocker D, Ryan H, Sloan DJ. Linezolid for drug-resistant pulmonary tuberculosis. *Cochrane Database Syst Rev.* 2019 Mar 20;3:CD012836. doi: 10.1002/14651858.CD012836.pub2. Review. PubMed PMID: 30893466; PubMed Central PMCID: PMC6426281.

2: Lyakurwa D, Lyimo J, Mleoh L, Riziki K, Lupinda M, Mpondo BC. Successful treatment of XDR-TB patient in Tanzania: report of the first XDR-TB patient. *Trop Doct.* 2019 Mar 18:49475519833554. doi: 10.1177/0049475519833554. [Epub ahead of print] PubMed PMID: 30885056.

3: Sarin R, Singla N, Vohra V, Singla R, Puri MM, Munjal S, Khalid UK, Myneedu VP, Kumar Verma A, Mathuria KK. Initial experience of bedaquiline implementation under the National TB Programme at NITRD, Delhi, India. *Indian J Tuberc.* 2019 Jan;66(1):209-213. doi: 10.1016/j.ijtb.2019.02.009. Epub 2019 Feb 27. PubMed PMID: 30878071.

4: Sarin R, Vohra V, Singla N, Singla R, Puri MM, Munjal SK, Khalid UK, Myneedu VP, Verma A, Mathuria KK. Early efficacy and safety of Bedaquiline and Delamanid given together in a "Salvage Regimen" for treatment of drug-resistant tuberculosis. *Indian J Tuberc.* 2019 Jan;66(1):184-188. doi: 10.1016/j.ijtb.2019.02.006. Epub 2019 Feb 27. PubMed PMID: 30878066.

5: Shirley M. Amikacin Liposome Inhalation Suspension: A Review in Mycobacterium avium Complex Lung Disease. *Drugs.* 2019 Apr;79(5):555-562. doi: 10.1007/s40265-019-01095-z. Erratum in: *Drugs.* 2019 Apr 3;:. PubMed PMID: 30877642.

6: Savioli MTG, Morrone N, Santoro I. Primary bacillary resistance in multidrug-resistant tuberculosis and predictive factors associated with cure at a referral center in São Paulo, Brazil. *J Bras Pneumol.* 2019 Mar 11;45(2):e20180075. doi: 10.1590/1806-3713/e20180075. English, Portuguese. PubMed PMID: 30864608.

7: Moon SM, Choe J, Jhun BW, Jeon K, Kwon OJ, Huh HJ, Lee NY, Daley CL, Koh WJ.

Treatment with a macrolide-containing regimen for *Mycobacterium kansasii* pulmonary disease. *Respir Med.* 2019 Mar;148:37-42. doi: 10.1016/j.rmed.2019.01.012. Epub 2019 Jan 30. PubMed PMID: 30827472.

8: Padmapriyadarsini C, Bhavani PK, Natrajan M, Ponnuraja C, Kumar H, Gomathy SN, Guleria R, Jawahar SM, Singh M, Balganesht T, Swaminathan S. Evaluation of metformin in combination with rifampicin containing antituberculosis therapy in patients with new, smear-positive pulmonary tuberculosis (METRIF): study protocol for a randomised clinical trial. *BMJ Open.* 2019 Mar 1;9(3):e024363. doi: 10.1136/bmjopen-2018-024363. PubMed PMID: 30826761; PubMed Central PMCID: PMC6429929.

9: Lai JML, Yang SL, Avoi R. Treating More with Less: Effectiveness and Event Outcomes of Antituberculosis Fixed-dose Combination Drug versus Separate-drug Formulation (Ethambutol, Isoniazid, Rifampicin and Pyrazinamide) for Pulmonary Tuberculosis Patients in Real-world Clinical Practice. *J Glob Infect Dis.* 2019 Jan-Mar;11(1):2-6. doi: 10.4103/jgid.jgid\_50\_18. PubMed PMID: 30814828; PubMed Central PMCID: PMC6380106.

10: Perumal R, Padayatchi N, Yende-Zuma N, Naidoo A, Govender D, Naidoo K. A moxifloxacin-based regimen for the treatment of recurrent drug-sensitive pulmonary tuberculosis: An open-label randomised controlled trial. *Clin Infect Dis.* 2019 Feb 27. pii: ciz152. doi: 10.1093/cid/ciz152. [Epub ahead of print] PubMed PMID: 30809633.

11: Nandasena S, Senavirathna C, Munasinghe C, Wijesena C, Sucharitharathna R. Characteristics and sputum conversion of tuberculosis (TB) patients in Kalutara, Sri Lanka. *Indian J Tuberc.* 2019 Jan;66(1):76-80. doi: 10.1016/j.ijtb.2018.04.008. Epub 2018 Apr 13. PubMed PMID: 30797288.

12: Soedarsono S, Subiantoro MC. Changes of CRP serum levels in pulmonary TB patients with AFB smear-positive sputum before and two months after receiving anti-tuberculosis drug treatment. *Indian J Tuberc.* 2019 Jan;66(1):134-138. doi: 10.1016/j.ijtb.2018.07.007. Epub 2018 Oct 12. PubMed PMID: 30797271.

13: Bhatt R, Chopra K, Vashisht R. Impact of integrated psycho-socio-economic support on treatment outcome in drug resistant tuberculosis - A retrospective cohort study. *Indian J Tuberc.* 2019 Jan;66(1):105-110. doi: 10.1016/j.ijtb.2018.05.020. Epub 2018 Jun 13. PubMed PMID: 30797265.

14: Cruz AT, Starke JR. Window Period Prophylaxis for Children Exposed to Tuberculosis, Houston, Texas, USA, 2007-2017. *Emerg Infect Dis.* 2019 Mar;25(3):523-528. doi: 10.3201/eid2503.181596. PubMed PMID: 30789136; PubMed Central PMCID: PMC6390765.

15: Ma Y, Che NY, Liu YH, Shu W, Du J, Xie SH, Li L. The joint impact of smoking plus alcohol drinking on treatment of pulmonary tuberculosis. *Eur J Clin Microbiol Infect Dis.* 2019 Apr;38(4):651-657. doi: 10.1007/s10096-019-03489-z. Epub 2019 Feb 15. PubMed PMID: 30771122.

16: Tsuyuguchi K, Sasaki Y, Mitarai S, Kurosawa K, Saito Y, Koh T. Safety, efficacy, and pharmacokinetics of bedaquiline in Japanese patients with pulmonary multidrug-resistant tuberculosis: An interim analysis of an open-label, phase 2 study. *Respir Investig.* 2019 Feb 7. pii: S2212-5345(18)30240-5. doi: 10.1016/j.resinv.2019.01.001. [Epub ahead of print] PubMed PMID: 30745177.

17: Tokairin Y, Nakajima Y, Kawada K, Hoshino A, Okada T, Ryotokuji T, Ogo T, Okuda M, Kume Y, Kawamura Y, Yamaguchi K, Nagai K, Kawano T, Kinugasa Y. A feasibility study of mediastinoscopic radical esophagectomy for thoracic esophageal cancer from the viewpoint of the dissected mediastinal lymph nodes validated with thoracoscopic procedure: a prospective clinical trial. *Esophagus.*

2019 Apr;16(2):214-219. doi: 10.1007/s10388-018-00656-7. Epub 2019 Feb 8. PubMed  
PMID: 30737707.

18: Jolliffe DA, Ganmaa D, Wejse C, Raqib R, Haq MA, Salahuddin N, Daley PK, Ralph AP, Ziegler TR, Martineau AR. Adjunctive vitamin D in tuberculosis treatment: meta-analysis of individual participant data. Eur Respir J. 2019 Mar 7;53(3). pii: 1802003. doi: 10.1183/13993003.02003-2018. Print 2019 Mar. PubMed  
PMID: 30728208.

19: Bongiolatti S, Gonfiotti A, Viggiano D, Borgianni S, Politi L, Crisci R, Curcio C, Voltolini L; Italian VATS Group. Risk factors and impact of conversion from VATS to open lobectomy: analysis from a national database. Surg Endosc. 2019 Jan 31. doi: 10.1007/s00464-019-06682-5. [Epub ahead of print] PubMed PMID: 30706153.

20: Kreisel CF, Passannante MR, Lardizabal AA. The Negative Clinical Impact of Diabetes on Tuberculosis: A Cross-Sectional Study in New Jersey. J Endocr Soc. 2018 Nov 14;3(1):62-68. doi: 10.1210/js.2018-00203. eCollection 2019 Jan 1. PubMed PMID: 30697601; PubMed Central PMCID: PMC6344343.

21: McCurtain JL, Gilbertsen AJ, Evert C, Williams BJ, Hunter RC. Agmatine accumulation by *Pseudomonas aeruginosa* clinical isolates confers antibiotic tolerance and dampens host inflammation. J Med Microbiol. 2019 Mar;68(3):446-455. doi: 10.1099/jmm.0.000928. Epub 2019 Jan 22. PubMed PMID: 30688634.

22: de Melo MGM, Mesquita EDD, Oliveira MM, da Silva-Monteiro C, Silveira AKA, Malaquias TS, Dutra TCP, Galliez RM, Kritski AL, Silva EC; Rede-TB Study Group. Imbalance of NET and Alpha-1-Antitrypsin in Tuberculosis Patients Is Related With Hyper Inflammation and Severe Lung Tissue Damage. Front Immunol. 2019 Jan 10;9:3147. doi: 10.3389/fimmu.2018.03147. eCollection 2018. PubMed PMID: 30687336; PubMed Central PMCID: PMC6335334.

23: Reimann M, Schaub D, Kalsdorf B, Runge C, Carballo PS, Terhalle E, Salzer HJF, Lange C, Heyckendorf J. Cigarette smoking and culture conversion in patients with susceptible and M/XDR-TB. *Int J Tuberc Lung Dis*. 2019 Jan 1;23(1):93-98. doi: 10.5588/ijtld.18.0354. PubMed PMID: 30674380.

24: Lee M, Mok J, Kim DK, Shim TS, Koh WJ, Jeon D, Lee T, Lee SH, Kim JS, Park JS, Lee JY, Kim SY, Lee JH, Jo KW, Jhun BW, Kang YA, Ahn JH, Kim CK, Shin S, Song T, Shin SJ, Kim YR, Ahn H, Hahn S, Won HJ, Jang JY, Cho SN, Yim JJ. Delamanid, linezolid, levofloxacin, and pyrazinamide for the treatment of patients with fluoroquinolone-sensitive multidrug-resistant tuberculosis (Treatment Shortening of MDR-TB Using Existing and New Drugs, MDR-END): study protocol for a phase II/III, multicenter, randomized, open-label clinical trial. *Trials*. 2019 Jan 16;20(1):57. doi: 10.1186/s13063-018-3053-1. PubMed PMID: 30651149; PubMed Central PMCID: PMC6335682.

25: Warsinske HC, Rao AM, Moreira FMF, Santos PCP, Liu AB, Scott M, Malherbe ST, Ronacher K, Walzl G, Winter J, Sweeney TE, Croda J, Andrews JR, Khatri P. Assessment of Validity of a Blood-Based 3-Gene Signature Score for Progression and Diagnosis of Tuberculosis, Disease Severity, and Treatment Response. *JAMA Netw Open*. 2018 Oct 5;1(6):e183779. doi: 10.1001/jamanetworkopen.2018.3779. PubMed PMID: 30646264; PubMed Central PMCID: PMC6324428.

26: Dousa KM, Hamad A, Albirair M, Al Soub H, Elzouki AN, Alwakeel MI, Thiel BA, Johnson JL. Impact of Diabetes Mellitus on the Presentation and Response to Treatment of Adults With Pulmonary Tuberculosis in Qatar. *Open Forum Infect Dis*. 2018 Dec 19;6(1):ofy335. doi: 10.1093/ofid/ofy335. eCollection 2019 Jan. PubMed PMID: 30631793; PubMed Central PMCID: PMC6324545.

27: von Groote-Bidlingmaier F, Patientia R, Sanchez E, Balanag V Jr, Ticona E,

Segura P, Cadena E, Yu C, Cirule A, Lizarbe V, Davidaviciene E, Domete L, Variava E, Caoili J, Danilovits M, Bielskiene V, Staples S, Hittel N, Petersen C, Wells C, Hafkin J, Geiter LJ, Gupta R. Efficacy and safety of delamanid in combination with an optimised background regimen for treatment of multidrug-resistant tuberculosis: a multicentre, randomised, double-blind, placebo-controlled, parallel group phase 3 trial. *Lancet Respir Med*. 2019 Mar;7(3):249-259. doi: 10.1016/S2213-2600(18)30426-0. Epub 2019 Jan 7. PubMed PMID: 30630778.

28: Nkurunziza J, Karstaedt AS, Louw R, Padanilam X. Treatment outcomes of pre- and extensively drug-resistant tuberculosis in Johannesburg, South Africa. *Int J Tuberc Lung Dis*. 2018 Dec 1;22(12):1469-1474. doi: 10.5588/ijtld.18.0205. PubMed PMID: 30606319.

29: Mukisa J, Kawooya I, Nangendo J, Nalutaaya A, Nyamwiza J, Sam A, Ssenyonga R, Worodria W, Mupere E. Male gender and duration of anti-tuberculosis treatment are associated with hypocholesterolemia in adult pulmonary tuberculosis patients in Kampala, Uganda. *Afr Health Sci*. 2018 Sep;18(3):479-487. doi: 10.4314/ahs.v18i3.3. PubMed PMID: 30602978; PubMed Central PMCID: PMC6307033.

30: Htun YM, Khaing TMM, Aung NM, Yin Y, Myint Z, Aung ST, Soonthornworasiri N, Silachamroon U, Kasetjaroen Y, Kaewkungwal J. Delay in treatment initiation and treatment outcomes among adult patients with multidrug-resistant tuberculosis at Yangon Regional Tuberculosis Centre, Myanmar: A retrospective study. *PLoS One*. 2018 Dec 31;13(12):e0209932. doi: 10.1371/journal.pone.0209932. eCollection 2018. PubMed PMID: 30596734; PubMed Central PMCID: PMC6312206.

31: Kwon YS, Koh WJ, Daley CL. Treatment of Mycobacterium avium Complex Pulmonary Disease. *Tuberc Respir Dis (Seoul)*. 2019 Jan;82(1):15-26. doi: 10.4046/trd.2018.0060. Review. PubMed PMID: 30574687; PubMed Central PMCID: PMC6304322.

32: Choi JY, Jhun BW, Hyun SH, Chung MJ, Koh WJ. (18)F-Fluorodeoxyglucose Positron Emission Tomography/Computed Tomography for Assessing Treatment Response of Pulmonary Multidrug-Resistant Tuberculosis. *J Clin Med*. 2018 Dec 17;7(12). pii: E559. doi: 10.3390/jcm7120559. PubMed PMID: 30562940; PubMed Central PMCID: PMC6307081.

33: Davies Forsman L, Jonsson J, Wagrell C, Werngren J, Mansjö M, Wijkander M, Groenheit R, Hammar U, Giske CG, Schön T, Bruchfeld J. Minimum inhibitory concentrations of fluoroquinolones and pyrazinamide susceptibility correlate to clinical improvement in MDR-TB patients - a nationwide Swedish cohort study over two decades. *Clin Infect Dis*. 2018 Dec 18. doi: 10.1093/cid/ciy1068. [Epub ahead of print] PubMed PMID: 30561569.

34: Ige OM, Oladokun RE. Time to sputum culture conversion and treatment outcome among the first cohort of multidrug resistant tuberculosis patients in a high burden country. *Indian J Tuberc*. 2018 Oct;65(4):322-328. doi: 10.1016/j.ijtb.2018.07.006. Epub 2018 Aug 9. PubMed PMID: 30522620.

35: Diarra B, Kone M, Togo ACG, Sarro YDS, Cisse AB, Somboro A, Degoga B, Tolofoudie M, Kone B, Sanogo M, Baya B, Kodio O, Maiga M, Belson M, Orsega S, Krit M, Dao S, Maiga II, Murphy RL, Rigouts L, Doumbia S, Diallo S, de Jong BC. *Mycobacterium africanum* (Lineage 6) shows slower sputum smear conversion on tuberculosis treatment than *Mycobacterium tuberculosis* (Lineage 4) in Bamako, Mali. *PLoS One*. 2018 Dec 12;13(12):e0208603. doi: 10.1371/journal.pone.0208603. eCollection 2018. PubMed PMID: 30540823; PubMed Central PMCID: PMC6291124.

36: Akinsola OJ, Yusuf OB, Ige OM, Okonji PE. Models for Predicting Time to Sputum Conversion Among Multi-Drug Resistant Tuberculosis Patients in Lagos, South-West Nigeria. *Front Public Health*. 2018 Nov 27;6:347. doi: 10.3389/fpubh.2018.00347. eCollection 2018. PubMed PMID: 30538978; PubMed Central

PMCID: PMC6277524.

37: Deshpande D, Pasipanodya JG, Mpagama SG, Bendet P, Srivastava S, Koeuth T, Lee PS, Bhavnani SM, Ambrose PG, Thwaites G, Heysell SK, Gumbo T. Levofloxacin Pharmacokinetics/Pharmacodynamics, Dosing, Susceptibility Breakpoints, and Artificial Intelligence in the Treatment of Multidrug-resistant Tuberculosis. Clin Infect Dis. 2018 Nov 28;67(suppl\_3):S293-S302. doi: 10.1093/cid/ciy611. PubMed PMID: 30496461; PubMed Central PMCID: PMC6260169.

38: Pasipanodya JG, Smythe W, Merle CS, Olliaro PL, Deshpande D, Magombedze G, McIlleron H, Gumbo T. Artificial intelligence-derived 3-Way Concentration-dependent Antagonism of Gatifloxacin, Pyrazinamide, and Rifampicin During Treatment of Pulmonary Tuberculosis. Clin Infect Dis. 2018 Nov 28;67(suppl\_3):S284-S292. doi: 10.1093/cid/ciy610. PubMed PMID: 30496458.

39: Deshpande D, Pasipanodya JG, Mpagama SG, Srivastava S, Bendet P, Koeuth T, Lee PS, Heysell SK, Gumbo T. Ethionamide Pharmacokinetics/Pharmacodynamics-derived Dose, the Role of MICs in Clinical Outcome, and the Resistance Arrow of Time in Multidrug-resistant Tuberculosis. Clin Infect Dis. 2018 Nov 28;67(suppl\_3):S317-S326. doi: 10.1093/cid/ciy609. PubMed PMID: 30496457; PubMed Central PMCID: PMC6260165.

40: Visser J, McLachlan MH, Maayan N, Garner P. Community-based supplementary feeding for food insecure, vulnerable and malnourished populations - an overview of systematic reviews. Cochrane Database Syst Rev. 2018 Nov 9;11:CD010578. doi: 10.1002/14651858.CD010578.pub2. PubMed PMID: 30480324.

41: Lee JK, Lee JY, Kim DK, Yoon HI, Jeong I, Heo EY, Park YS, Jo YS, Lee JH, Park SS, Park JS, Kim J, Lee SM, Joh JS, Lee CH, Lee J, Choi SM, Park JH, Lee SH, Cho YJ, Lee YJ, Kim SJ, Kwak N, Hwang YR, Kim H, Ki J, Lim JN, Choi HS, Lee M, Song T, Kim HS, Han J, Ahn H, Hahn S, Yim JJ. Substitution of ethambutol with

linezolid during the intensive phase of treatment of pulmonary tuberculosis: a prospective, multicentre, randomised, open-label, phase 2 trial. Lancet Infect Dis. 2019 Jan;19(1):46-55. doi: 10.1016/S1473-3099(18)30480-8. Epub 2018 Nov 23. PubMed PMID: 30477961.

42: Meintjes G, Stek C, Blumenthal L, Thienemann F, Schutz C, Buyze J, Ravinotto R, van Loen H, Nair A, Jackson A, Colebunders R, Maartens G, Wilkinson RJ, Lynen L; PredART Trial Team. Prednisone for the Prevention of Paradoxical Tuberculosis-Associated IRIS. N Engl J Med. 2018 Nov 15;379(20):1915-1925. doi: 10.1056/NEJMoal800762. PubMed PMID: 30428290.

43: Ferrian S, Ross M, Conradie F, Vally Omar S, Ismail N, Little F, Kaplan G, Fallows D, Gray CM. Frequency of Circulating CD4(+)Ki67(+)HLA-DR(-) T Regulatory Cells Prior to Treatment for Multidrug Resistant Tuberculosis Can Differentiate the Severity of Disease and Predict Time to Culture Conversion. Front Immunol. 2018 Oct 25;9:2438. doi: 10.3389/fimmu.2018.02438. eCollection 2018. PubMed PMID: 30410488; PubMed Central PMCID: PMC6209685.

44: Parvaresh L, Bag SK, Cho JG, Heron N, Assareh H, Norton S, Corbett S, Marais BJ. Monitoring tuberculosis contact tracing outcomes in Western Sydney, Australia. BMJ Open Respir Res. 2018 Oct 25;5(1):e000341. doi: 10.1136/bmjresp-2018-000341. eCollection 2018. PubMed PMID: 30397487; PubMed Central PMCID: PMC6203069.

45: Te Riele JB, Buser V, Calligaro G, Esmail A, Theron G, Lesosky M, Dheda K. Relationship between chest radiographic characteristics, sputum bacterial load, and treatment outcomes in patients with extensively drug-resistant tuberculosis. Int J Infect Dis. 2019 Feb;79:65-71. doi: 10.1016/j.ijid.2018.10.026. Epub 2018 Nov 3. PubMed PMID: 30395979.

46: Yamada K, Seki Y, Nakagawa T, Hayashi Y, Yagi M, Ogawa K. Outcomes and risk

factors after adjuvant surgical treatments for Mycobacterium avium complex lung disease. Gen Thorac Cardiovasc Surg. 2018 Nov 2. doi: 10.1007/s11748-018-1029-4. [Epub ahead of print] PubMed PMID: 30390231.

47: Choi JS, Lee SH, Leem AY, Song JH, Kim SY, Chung KS, Jung JY, Kang YA, Kim YS, Chang J, Park MS. Pneumocystis jirovecii pneumonia (PCP) PCR-negative conversion predicts prognosis of HIV-negative patients with PCP and acute respiratory failure. PLoS One. 2018 Oct 25;13(10):e0206231. doi: 10.1371/journal.pone.0206231. eCollection 2018. PubMed PMID: 30359436; PubMed Central PMCID: PMC6201940.

48: Ahmed MIM, Ntinginya NE, Kibiki G, Mtafya BA, Semvua H, Mpagama S, Mtabho C, Saathoff E, Held K, Loose R, Kroidl I, Chachage M, von Both U, Haule A, Mekota AM, Boeree MJ, Gillespie SH, Hoelscher M, Heinrich N, Geldmacher C. Phenotypic Changes on Mycobacterium Tuberculosis-Specific CD4 T Cells as Surrogate Markers for Tuberculosis Treatment Efficacy. Front Immunol. 2018 Sep 28;9:2247. doi: 10.3389/fimmu.2018.02247. eCollection 2018. PubMed PMID: 30323818; PubMed Central PMCID: PMC6172348.

49: Myers B, Bouton TC, Ragan EJ, White LF, McIlleron H, Theron D, Parry CDH, Horsburgh CR, Warren RM, Jacobson KR. Impact of alcohol consumption on tuberculosis treatment outcomes: a prospective longitudinal cohort study protocol. BMC Infect Dis. 2018 Sep 29;18(1):488. doi: 10.1186/s12879-018-3396-y. PubMed PMID: 30268101; PubMed Central PMCID: PMC6162918.

50: Griffith DE, Eagle G, Thomson R, Aksamit TR, Hasegawa N, Morimoto K, Addrizzo-Harris DJ, O'Donnell AE, Marras TK, Flume PA, Loebinger MR, Morgan L, Codecasa LR, Hill AT, Ruoss SJ, Yim JJ, Ringshausen FC, Field SK, Philley JV, Wallace RJ Jr, van Ingen J, Coulter C, Nezamis J, Winthrop KL; CONVERT Study Group. Amikacin Liposome Inhalation Suspension for Treatment-Refractory Lung

Disease Caused by Mycobacterium avium Complex (CONVERT): A Prospective, Open-Label, Randomized Study. Am J Respir Crit Care Med. 2018 Sep 14. doi: 10.1164/rccm.201807-1318OC. [Epub ahead of print] PubMed PMID: 30216086.

51: Ni Y, Ding L, Yu Y, Dai R, Chen H, Shi G. Oscillatory positive expiratory pressure treatment in lower respiratory tract infection. Exp Ther Med. 2018 Oct;16(4):3241-3248. doi: 10.3892/etm.2018.6552. Epub 2018 Aug 1. PubMed PMID: 30214547; PubMed Central PMCID: PMC6125886.

52: Yuengling KA, Padayatchi N, Wolf A, Mathema B, Brown T, Horsburgh CR, O'Donnell MR. Effect of Antiretroviral Therapy on Treatment Outcomes in a Prospective Study of Extensively Drug-Resistant Tuberculosis (XDR-TB) HIV Coinfection Treatment in KwaZulu-Natal, South Africa. J Acquir Immune Defic Syndr. 2018 Dec 1;79(4):474-480. doi: 10.1097/QAI.0000000000001833. PubMed PMID: 30212394; PubMed Central PMCID: PMC6203657.

53: Kedia K, Wendler JP, Baker ES, Burnum-Johnson KE, Jarsberg LG, Stratton KG, Wright AT, Piehowski PD, Gritsenko MA, Lewinsohn DM, Sigal GB, Weiner MH, Smith RD, Jacobs JM, Nahid P. Application of multiplexed ion mobility spectrometry towards the identification of host protein signatures of treatment effect in pulmonary tuberculosis. Tuberculosis (Edinb). 2018 Sep;112:52-61. doi: 10.1016/j.tube.2018.07.005. Epub 2018 Jul 18. PubMed PMID: 30205969; PubMed Central PMCID: PMC6181582.

54: Goring SM, Wilson JB, Risebrough NR, Gallagher J, Carroll S, Heap KJ, Obradovic M, Loebinger MR, Diel R. The cost of Mycobacterium avium complex lung disease in Canada, France, Germany, and the United Kingdom: a nationally representative observational study. BMC Health Serv Res. 2018 Sep 10;18(1):700. doi: 10.1186/s12913-018-3489-8. PubMed PMID: 30200944; PubMed Central PMCID: PMC6131733.

55: Kibuule D, Verbeeck RK, Nunurai R, Mavhunga F, Ene E, Godman B, Rennie TW.

Predictors of tuberculosis treatment success under the DOTS program in Namibia.

Expert Rev Respir Med. 2018 Nov;12(11):979-987. doi:

10.1080/17476348.2018.1520637. Epub 2018 Oct 4. PubMed PMID: 30198358.

56: Afzal A, Rathore R, Butt NF, Randhawa FA. Efficacy of Vitamin D supplementation in achieving an early Sputum Conversion in Smear positive

Pulmonary Tuberculosis. Pak J Med Sci. 2018 Jul-Aug;34(4):849-854.

doi:

10.12669/pjms.344.14397. PubMed PMID: 30190740; PubMed Central PMCID: PMC6115594.

57: Filate M, Mehari Z, Alemu YM. Longitudinal body weight and sputum conversion

in patients with tuberculosis, Southwest Ethiopia: a retrospective follow-up

study. BMJ Open. 2018 Sep 5;8(9):e019076. doi: 10.1136/bmjopen-2017-019076.

PubMed PMID: 30185566; PubMed Central PMCID: PMC6129038.

58: Aznar ML, Zubrinic M, Siemienowicz M, Hashimoto K, Brode SK, Mehrabi M,

Patsios D, Keshavjee S, Marras TK. Adjuvant lung resection in the management of

nontuberculous mycobacterial lung infection: A retrospective matched cohort

study. Respir Med. 2018 Sep;142:1-6. doi:

10.1016/j.rmed.2018.07.003. Epub 2018

Jul 9. PubMed PMID: 30170795.

59: Alfarisi O, Mave V, Gaikwad S, Sahasrabudhe T, Ramachandran G, Kumar H, Gupte

N, Kulkarni V, Deshmukh S, Atre S, Raskar S, Lokhande R, Barthwal M, Kakrani A,

Chon S, Gupta A, Golub JE, Dooley KE. Effect of Diabetes Mellitus on the

Pharmacokinetics and Pharmacodynamics of Tuberculosis Treatment. Antimicrob

Agents Chemother. 2018 Oct 24;62(11). pii: e01383-18. doi:

10.1128/AAC.01383-18.

Print 2018 Nov. PubMed PMID: 30126955; PubMed Central PMCID:

PMC6201087.

60: Tan Q, Ai Q, Xu Q, Li F, Yu J. Polymorphonuclear Leukocytes or Hydrogen

Peroxide Enhance Biofilm Development of Mucoid *Pseudomonas aeruginosa*. Mediators Inflamm. 2018 Jul 4;2018:8151362. doi: 10.1155/2018/8151362. eCollection 2018. PubMed PMID: 30116152; PubMed Central PMCID: PMC6079396.

61: Shin SH, Jhun BW, Kim SY, Choe J, Jeon K, Huh HJ, Ki CS, Lee NY, Shin SJ, Daley CL, Koh WJ. Nontuberculous Mycobacterial Lung Diseases Caused by Mixed Infection with Mycobacterium avium Complex and Mycobacterium abscessus Complex. Antimicrob Agents Chemother. 2018 Sep 24;62(10). pii: e01105-18. doi: 10.1128/AAC.01105-18. Print 2018 Oct. PubMed PMID: 30104265; PubMed Central PMCID: PMC6153851.

62: Al-Shaer MH, Elewa H, Alkabab Y, Nazer LH, Heysell SK. Fixed-dose combination associated with faster time to smear conversion compared to separate tablets of anti-tuberculosis drugs in patients with poorly controlled diabetes and pulmonary tuberculosis in Qatar. BMC Infect Dis. 2018 Aug 8;18(1):384. doi: 10.1186/s12879-018-3309-0. PubMed PMID: 30089476; PubMed Central PMCID: PMC6083564.

63: Ghosh R, Roy S, Rashid MK. Assessment of microbiological status after successful completion of intermittent revised national tuberculosis control programme directly observed treatment, short course regimen for microbiologically confirmed pulmonary tuberculosis cases: While new daily regimen going to be implemented in India. Indian J Med Microbiol. 2018 Apr-Jun;36(2):251-256. doi: 10.4103/ijmm.IJMM\_18\_65. PubMed PMID: 30084420.

64: Feng JY, Pan SW, Huang SF, Chen YY, Lin YY, Su WJ. Depressed Gamma Interferon Responses and Treatment Outcomes in Tuberculosis Patients: a Prospective Cohort Study. J Clin Microbiol. 2018 Sep 25;56(10). pii: e00664-18. doi: 10.1128/JCM.00664-18. Print 2018 Oct. PubMed PMID: 30068533; PubMed Central PMCID: PMC6156303.

65: Liu Y, Matsumoto M, Ishida H, Ohguro K, Yoshitake M, Gupta R, Geiter L, Hafkin J. Delamanid: From discovery to its use for pulmonary multidrug-resistant tuberculosis (MDR-TB). *Tuberculosis (Edinb)*. 2018 Jul;111:20-30. doi: 10.1016/j.tube.2018.04.008. Epub 2018 May 3. Review. PubMed PMID: 30029909.

66: Zhang R, Xi X, Wang C, Pan Y, Ge C, Zhang L, Zhang S, Liu H. Therapeutic effects of recombinant human interleukin 2 as adjunctive immunotherapy against tuberculosis: A systematic review and meta-analysis. *PLoS One*. 2018 Jul 19;13(7):e0201025. doi: 10.1371/journal.pone.0201025. eCollection 2018. PubMed PMID: 30024982; PubMed Central PMCID: PMC6053227.

67: Meyvisch P, Kambili C, Andries K, Lounis N, Theeuwes M, Dannemann B, Vandebosch A, Van der Elst W, Molenberghs G, Alonso A. Evaluation of six months sputum culture conversion as a surrogate endpoint in a multidrug resistant-tuberculosis trial. *PLoS One*. 2018 Jul 19;13(7):e0200539. doi: 10.1371/journal.pone.0200539. eCollection 2018. PubMed PMID: 30024924; PubMed Central PMCID: PMC6053142.

68: Rekha RS, Mily A, Sultana T, Haq A, Ahmed S, Mostafa Kamal SM, van Schadewijk A, Hiemstra PS, Gudmundsson GH, Agerberth B, Raqib R. Immune responses in the treatment of drug-sensitive pulmonary tuberculosis with phenylbutyrate and vitamin D(3) as host directed therapy. *BMC Infect Dis*. 2018 Jul 4;18(1):303. doi: 10.1186/s12879-018-3203-9. PubMed PMID: 29973153; PubMed Central PMCID: PMC6033279.

69: Alipanah N, Jarlsberg L, Miller C, Linh NN, Falzon D, Jaramillo E, Nahid P. Adherence interventions and outcomes of tuberculosis treatment: A systematic review and meta-analysis of trials and observational studies. *PLoS Med*. 2018 Jul 3;15(7):e1002595. doi: 10.1371/journal.pmed.1002595. eCollection 2018 Jul. PubMed PMID: 29969463; PubMed Central PMCID: PMC6029765.

70: do Socorro Nantua Evangelista M, Maia R, Toledo JP, de Abreu RG, Braga JU, Barreira D, Trajman A. Second month sputum smear as a predictor of tuberculosis treatment outcomes in Brazil. BMC Res Notes. 2018 Jun 28;11(1):414. doi: 10.1186/s13104-018-3522-3. PubMed PMID: 29954436; PubMed Central PMCID: PMC6022340.

71: Wu HX, Xiong XF, Zhu M, Wei J, Zhuo KQ, Cheng DY. Effects of vitamin D supplementation on the outcomes of patients with pulmonary tuberculosis: a systematic review and meta-analysis. BMC Pulm Med. 2018 Jun 28;18(1):108. doi: 10.1186/s12890-018-0677-6. PubMed PMID: 29954353; PubMed Central PMCID: PMC6025740.

72: Shibabaw A, Gelaw B, Wang SH, Tessema B. Time to sputum smear and culture conversions in multidrug resistant tuberculosis at University of Gondar Hospital, Northwest Ethiopia. PLoS One. 2018 Jun 26;13(6):e0198080. doi: 10.1371/journal.pone.0198080. eCollection 2018. PubMed PMID: 29944658; PubMed Central PMCID: PMC6019386.

73: Kumar R, Rai J, Kajal NC, Devi P. Comparative study of effect of Withania somnifera as an adjuvant to DOTS in patients of newly diagnosed sputum smear positive pulmonary tuberculosis. Indian J Tuberc. 2018 Jul;65(3):246-251. doi: 10.1016/j.ijtb.2017.05.005. Epub 2017 May 21. PubMed PMID: 29933868.

74: Yihunie Akalu T, Muchie KF, Alemu Gelaye K. Time to sputum culture conversion and its determinants among Multi-drug resistant Tuberculosis patients at public hospitals of the Amhara Regional State: A multicenter retrospective follow up study. PLoS One. 2018 Jun 21;13(6):e0199320. doi: 10.1371/journal.pone.0199320. eCollection 2018. PubMed PMID: 29927980; PubMed Central PMCID: PMC6013102.

75: Diktanas S, Vasiliauskiene E, Polubenko K, Danila E, Celedinaite I,

Boreikaite E, Misiunas K. Factors Associated with Persistent Sputum Positivity at the End of the Second Month of Tuberculosis Treatment in Lithuania. *Tuberc Respir Dis (Seoul)*. 2018 Jul;81(3):233-240. doi: 10.4046/trd.2017.0096. Epub 2018 Jun 19. PubMed PMID: 29926543; PubMed Central PMCID: PMC6030656.

76: Svensson EM, Svensson RJ, Te Brake LHM, Boeree MJ, Heinrich N, Konsten S, Churchyard G, Dawson R, Diacon AH, Kibiki GS, Minja LT, Ntingiya NE, Sanne I, Gillespie SH, Hoelscher M, Phillips PPJ, Simonsson USH, Aarnoutse R. The Potential for Treatment Shortening With Higher Rifampicin Doses: Relating Drug Exposure to Treatment Response in Patients With Pulmonary Tuberculosis. *Clin Infect Dis*. 2018 Jun 18;67(1):34-41. doi: 10.1093/cid/ciy026. PubMed PMID: 29917079; PubMed Central PMCID: PMC6005123.

77: Wang J, Feng M, Ying S, Zhou J, Li X. Efficacy and Safety of Vitamin D Supplementation for Pulmonary Tuberculosis: A Systematic Review and Meta-analysis. *Iran J Public Health*. 2018 Apr;47(4):466-472. Review. PubMed PMID: 29900130; PubMed Central PMCID: PMC5996342.

78: Patel SV, Nimavat KB, Patel AB, Mehta KG, Shringarpure K, Shukla LK. Sputum Smear and Culture Conversion in Multidrug Resistance Tuberculosis Patients in Seven Districts of Central Gujarat, India: A Longitudinal Study. *Indian J Community Med*. 2018 Apr-Jun;43(2):117-119. doi: 10.4103/ijcm.IJCM\_152\_17. PubMed PMID: 29899612; PubMed Central PMCID: PMC5974826.

79: Cailleaux-Cezar M, Loredó C, Silva JRLE, Conde MB. Impact of smoking on sputum culture conversion and pulmonary tuberculosis treatment outcomes in Brazil: a retrospective cohort study. *J Bras Pneumol*. 2018 Apr;44(2):99-105. doi: 10.1590/s1806-37562017000000161. Portuguese, English. PubMed PMID: 29791542; PubMed Central PMCID: PMC6044654.

80: Alene KA, Viney K, Yi H, McBryde ES, Yang K, Bai L, Gray DJ, Xu Z, Clements

ACA. Comparison of the validity of smear and culture conversion as a prognostic marker of treatment outcome in patients with multidrug-resistant tuberculosis.

PLoS One. 2018 May 23;13(5):e0197880. doi: 10.1371/journal.pone.0197880.

eCollection 2018. PubMed PMID: 29791488; PubMed Central PMCID: PMC5965863.

81: Agodokpessi G, Wachinou AP, Awanou B, Gninafon M. [Factors associated with non-conversion of the direct smear after the initial phase of anti-tuberculous treatment. A study undertaken in three tuberculosis management centres in South Benin]. Rev Mal Respir. 2018 May;35(5):546-551. doi: 10.1016/j.rmr.2017.06.004. Epub 2018 May 16. French. PubMed PMID: 29778620.

82: Musarurwa C, Zijenah LS, Mhandire DZ, Bandason T, Mhandire K, Chipiti MM, Munjoma MW, Mujaji WB. Higher serum 25-hydroxyvitamin D concentrations are associated with active pulmonary tuberculosis in hospitalised HIV infected patients in a low income tropical setting: a cross sectional study. BMC Pulm Med. 2018 May 8;18(1):67. doi: 10.1186/s12890-018-0640-6. PubMed PMID: 29739378; PubMed Central PMCID: PMC5941493.

83: Mohr E, Hughes J, Reuter A, Trivino Duran L, Ferlazzo G, Daniels J, De Azevedo V, Kock Y, Steele SJ, Shroufi A, Ade S, Alikhanova N, Benedetti G, Edwards J, Cox H, Furin J, Isaakidis P. Delamanid for rifampicin-resistant tuberculosis: a retrospective study from South Africa. Eur Respir J. 2018 Jun 14;51(6). pii: 1800017. doi: 10.1183/13993003.00017-2018. Print 2018 Jun. PubMed PMID: 29724920.

84: Asres A, Jerene D, Deressa W. Delays to treatment initiation is associated with tuberculosis treatment outcomes among patients on directly observed treatment short course in Southwest Ethiopia: a follow-up study. BMC Pulm Med. 2018 May 2;18(1):64. doi: 10.1186/s12890-018-0628-2. PubMed PMID: 29716569; PubMed Central PMCID: PMC5930812.

85: Bekele A, Gebreselassie N, Ashenafi S, Kassa E, Aseffa G, Amogne W, Getachew M, Aseffa A, Worku A, Raqib R, Agerberth B, Hammar U, Bergman P, Aderaye G, Andersson J, Brighenti S. Daily adjunctive therapy with vitamin D(3) and phenylbutyrate supports clinical recovery from pulmonary tuberculosis: a randomized controlled trial in Ethiopia. *J Intern Med*. 2018 Sep;284(3):292-306. doi: 10.1111/joim.12767. Epub 2018 May 23. PubMed PMID: 29696707; PubMed Central PMCID: PMC6202271.

86: Rumende CM. Risk Factors for Multidrug-resistant Tuberculosis. *Acta Med Indones*. 2018 Jan;50(1):1-2. PubMed PMID: 29686169.

87: Jhun BW, Yang B, Moon SM, Lee H, Park HY, Jeon K, Kwon OJ, Ahn J, Moon IJ, Shin SJ, Daley CL, Koh WJ. Amikacin Inhalation as Salvage Therapy for Refractory Nontuberculous Mycobacterial Lung Disease. *Antimicrob Agents Chemother*. 2018 Jun 26;62(7). pii: e00011-18. doi: 10.1128/AAC.00011-18. Print 2018 Jul. PubMed PMID: 29661870; PubMed Central PMCID: PMC6021683.

88: Parmar MM, Sachdeva KS, Dewan PK, Rade K, Nair SA, Pant R, Khaparde SD. Unacceptable treatment outcomes and associated factors among India's initial cohorts of multidrug-resistant tuberculosis (MDR-TB) patients under the revised national TB control programme (2007-2011): Evidence leading to policy enhancement. *PLoS One*. 2018 Apr 11;13(4):e0193903. doi: 10.1371/journal.pone.0193903. eCollection 2018. PubMed PMID: 29641576; PubMed Central PMCID: PMC5894982.

89: Rifat D, Prideaux B, Savic RM, Urbanowski ME, Parsons TL, Luna B, Marzinke MA, Ordonez AA, DeMarco VP, Jain SK, Dartois V, Bishai WR, Dooley KE. Pharmacokinetics of rifapentine and rifampin in a rabbit model of tuberculosis and correlation with clinical trial data. *Sci Transl Med*. 2018 Apr 4;10(435).

pii: eaai7786. doi: 10.1126/scitranslmed.aai7786. PubMed PMID: 29618565; PubMed Central PMCID: PMC5969904.

90: Javaid A, Ahmad N, Afridi AK, Basit A, Khan AH, Ahmad I, Atif M. Validity of Time to Sputum Culture Conversion to Predict Cure in Patients with Multidrug-Resistant Tuberculosis: A Retrospective Single-Center Study. *Am J Trop Med Hyg.* 2018 Jun;98(6):1629-1636. doi: 10.4269/ajtmh.17-0936. Epub 2018 Mar 29. PubMed PMID: 29611497; PubMed Central PMCID: PMC6086179.

91: Forson A, Kwara A, Kudzawu S, Omari M, Otu J, Gehre F, de Jong B, Antonio M. A cross-sectional study of tuberculosis drug resistance among previously treated patients in a tertiary hospital in Accra, Ghana: public health implications of standardized regimens. *BMC Infect Dis.* 2018 Apr 2;18(1):149. doi: 10.1186/s12879-018-3053-5. PubMed PMID: 29606091; PubMed Central PMCID: PMC5879759.

92: Heyckendorf J, van Leth F, Avsar K, Glattki G, Gänther G, Kalsdorf B, Müller M, Olaru ID, Rolling T, Salzer HJF, Schuhmann M, Terhalle E, Lange C. Treatment responses in multidrug-resistant tuberculosis in Germany. *Int J Tuberc Lung Dis.* 2018 Apr 1;22(4):399-406. doi: 10.5588/ijtld.17.0741. PubMed PMID: 29562987.

93: Proaño A, Bui DP, López JW, Vu NM, Bravard MA, Lee GO, Tracey BH, Xu Z, Comina G, Ticona E, Mollura DJ, Friedland JS, Moore DAJ, Evans CA, Caligiuri P, Gilman RH; Tuberculosis Working Group in Peru\*. Cough Frequency During Treatment Associated With Baseline Cavitory Volume and Proximity to the Airway in Pulmonary TB. *Chest.* 2018 Jun;153(6):1358-1367. doi: 10.1016/j.chest.2018.03.006. Epub 2018 Mar 17. PubMed PMID: 29559307; PubMed Central PMCID: PMC6026292.

94: Kim CT, Kim TO, Shin HJ, Ko YC, Hun Choe Y, Kim HR, Kwon YS. Bedaquiline and delamanid for the treatment of multidrug-resistant tuberculosis: a multicentre cohort study in Korea. *Eur Respir J.* 2018 Mar 22;51(3). pii: 1702467. doi:

10.1183/13993003.02467-2017. Print 2018 Mar. PubMed PMID: 29545276.

95: Lee YJ, Han SK, Park JH, Lee JK, Kim DK, Chung HS, Heo EY. The effect of metformin on culture conversion in tuberculosis patients with diabetes mellitus.

Korean J Intern Med. 2018 Sep;33(5):933-940. doi:

10.3904/kjim.2017.249. Epub

2018 Mar 16. PubMed PMID: 29540054; PubMed Central PMCID:

PMC6129638.

96: Kobayashi T, Tsuyuguchi K, Yoshida S, Kurahara Y, Ikegami N, Naito M, Sonobe

S, Maekura T, Tsuji T, Minomo S, Inoue Y, Suzuki K. Mycobacterium abscessus

subsp. abscessus Lung Disease: Drug Susceptibility Testing in Sputum Culture

Negative Conversion. Int J Mycobacteriol. 2018 Jan-Mar;7(1):69-75.

doi:

10.4103/ijmy.ijmy\_179\_17. PubMed PMID: 29516889.

97: Sekaggya-Wiltshire C, von Braun A, Lamorde M, Ledergerber B, Buzibye A,

Henning L, Musaazi J, Gutteck U, Denti P, de Kock M, Jetter A,

Byakika-Kibwika P,

Eberhard N, Matovu J, Joloba M, Muller D, Manabe YC, Kanya MR, Corti

N, Kambugu

A, Castelnuovo B, Fehr JS. Delayed Sputum Culture Conversion in

Tuberculosis-Human Immunodeficiency Virus-Coinfected Patients With Low Isoniazid

and Rifampicin Concentrations. Clin Infect Dis. 2018 Aug

16;67(5):708-716. doi:

10.1093/cid/ciy179. PubMed PMID: 29514175; PubMed Central PMCID:

PMC6094003.

98: Liu Q, Lu P, Martinez L, Yang H, Lu W, Ding X, Zhu L. Factors affecting time

to sputum culture conversion and treatment outcome of patients with multidrug-resistant tuberculosis in China. BMC Infect Dis. 2018 Mar 6;18(1):114.

doi: 10.1186/s12879-018-3021-0. PubMed PMID: 29510666; PubMed

Central PMCID:

PMC5840772.

99: Musteikienė G, Miliauskas S, Zaveckienė J, Ažemaitis M, Vitkauskienė A.

Factors associated with sputum culture conversion in patients with pulmonary

tuberculosis. Medicina (Kaunas). 2017;53(6):386-393. doi:

10.1016/j.medici.2018.01.005. Epub 2018 Feb 9. PubMed PMID:

29496377.

100: Kamariza M, Shieh P, Ealand CS, Peters JS, Chu B, Rodriguez-Rivera FP, Babu Sait MR, Treuren WV, Martinson N, Kalscheuer R, Kana BD, Bertozzi CR. Rapid detection of Mycobacterium tuberculosis in sputum with a solvatochromic trehalose probe. *Sci Transl Med.* 2018 Feb 28;10(430). pii: eaam6310. doi: 10.1126/scitranslmed.aam6310. PubMed PMID: 29491187; PubMed Central PMCID: PMC5985656.

101: Barišević D, Popović Grle S, Morović Vergles J, Ćuković Ćavka S, Jakopović M, Redžepi G, Boras Z, Barišević M, Samaržija M. QuantiFERON-TB Gold In-Tube Test in the Diagnosis of Latent Tuberculosis Infection in Arthritis Patients Treated with Tumor Necrosis Factor Antagonists. *Acta Clin Croat.* 2017 Jun;56(2):203-209. doi: 10.20471/acc.2017.56.02.02. PubMed PMID: 29485786.

102: Guo Q, Chu H, Ye M, Zhang Z, Li B, Yang S, Ma W, Yu F. The Clarithromycin Susceptibility Genotype Affects the Treatment Outcome of Patients with Mycobacterium abscessus Lung Disease. *Antimicrob Agents Chemother.* 2018 Apr 26;62(5). pii: e02360-17. doi: 10.1128/AAC.02360-17. Print 2018 May. PubMed PMID: 29483126; PubMed Central PMCID: PMC5923093.

103: Agrawal S, Parkash O, Palaniappan AN, Bhatia AK, Kumar S, Chauhan DS, Madhan Kumar M. Efficacy of T Regulatory Cells, Th17 Cells and the Associated Markers in Monitoring Tuberculosis Treatment Response. *Front Immunol.* 2018 Feb 5;9:157. doi: 10.3389/fimmu.2018.00157. eCollection 2018. PubMed PMID: 29472922; PubMed Central PMCID: PMC5810270.

104: Adane K, Spigt M, Dinant GJ. Tuberculosis treatment outcome and predictors in northern Ethiopian prisons: a five-year retrospective analysis. *BMC Pulm Med.* 2018 Feb 20;18(1):37. doi: 10.1186/s12890-018-0600-1. PubMed PMID: 29463234; PubMed Central PMCID: PMC5819685.

105: Hong JY, Kim M, Sol IS, Kim KW, Lee CM, Elias JA, Sohn MH, Lee CG.

Chitotriosidase inhibits allergic asthmatic airways via regulation of TGF- $\beta$ <sup>2</sup>

expression and Foxp3(+) Treg cells. *Allergy*. 2018 Aug;73(8):1686-1699. doi:

10.1111/all.13426. Epub 2018 Mar 5. PubMed PMID: 29420850; PubMed Central PMCID: PMC6047905.

106: Lv L, Li T, Xu K, Shi P, He B, Kong W, Wang J, Sun J. Sputum bacteriology

conversion and treatment outcome of patients with multidrug-resistant

tuberculosis. *Infect Drug Resist*. 2018 Jan 23;11:147-154. doi:

10.2147/IDR.S153499. eCollection 2018. PubMed PMID: 29416359; PubMed Central PMCID: PMC5790105.

107: Wang Q, Pang Y, Jing W, Liu Y, Wang N, Yin H, Zhang Q, Ye Z, Zhu M, Li F,

Liu P, Wu T, Chen W, Wu W, Qin Z, Qiu C, Deng Q, Xu T, Wang J, Guo R, Du Y, Wang

J, Huang H, Chen X, Chu N. Clofazimine for Treatment of Extensively Drug-Resistant Pulmonary Tuberculosis in China. *Antimicrob Agents Chemother*. 2018

Mar 27;62(4). pii: e02149-17. doi: 10.1128/AAC.02149-17. Print 2018 Apr. PubMed

PMID: 29378718; PubMed Central PMCID: PMC5913945.

108: Choi H, Jhun BW, Kim SY, Kim DH, Lee H, Jeon K, Kwon OJ, Huh HJ, Ki CS, Lee

NY, Shin SJ, Daley CL, Koh WJ. Treatment outcomes of macrolide-susceptible

*Mycobacterium abscessus* lung disease. *Diagn Microbiol Infect Dis*. 2018

Apr;90(4):293-295. doi: 10.1016/j.diagmicrobio.2017.12.008. Epub 2017 Dec 16.

PubMed PMID: 29329759.

109: Degner NR, Wang JY, Golub JE, Karakousis PC. Metformin Use Reverses the

Increased Mortality Associated With Diabetes Mellitus During Tuberculosis

Treatment. *Clin Infect Dis*. 2018 Jan 6;66(2):198-205. doi:

10.1093/cid/cix819.

PubMed PMID: 29325084; PubMed Central PMCID: PMC5848303.

110: Patel N, Jagannath K, Vora A, Patel M, Patel A. A Randomized, Controlled,

Phase III Clinical Trial to Evaluate the Efficacy and Tolerability of Risorine with Conventional Rifampicin in the Treatment of Newly Diagnosed Pulmonary Tuberculosis Patients. *J Assoc Physicians India*. 2017 Sep;65(9):48-54. PubMed PMID: 29313577.

111: Tan Q, Min R, Dai GQ, Wang YL, Nan L, Yang Z, Xia J, Pan SY, Mao H, Xie WP, Wang H. Clinical and Immunological Effects of rhIL-2 Therapy in Eastern Chinese Patients with Multidrug-resistant Tuberculosis. *Sci Rep*. 2017 Dec 19;7(1):17854. doi: 10.1038/s41598-017-18200-5. PubMed PMID: 29259310; PubMed Central PMCID: PMC5736576.

112: Jhun BW, Moon SM, Kim SY, Park HY, Jeon K, Kwon OJ, Huh HJ, Ki CS, Lee NY, Chung MJ, Lee KS, Shin SJ, Daley CL, Koh WJ. Intermittent Antibiotic Therapy for Recurrent Nodular Bronchiectatic Mycobacterium avium Complex Lung Disease. *Antimicrob Agents Chemother*. 2018 Jan 25;62(2). pii: e01812-17. doi: 10.1128/AAC.01812-17. Print 2018 Feb. PubMed PMID: 29203483; PubMed Central PMCID: PMC5786774.

113: Lima GL, Paupitz JA, Aikawa NE, Alvarenga JC, Pereira RMR. A randomized double-blind placebo-controlled trial of vitamin D supplementation in juvenile-onset systemic lupus erythematosus: positive effect on trabecular microarchitecture using HR-pQCT. *Osteoporos Int*. 2018 Mar;29(3):587-594. doi: 10.1007/s00198-017-4316-5. Epub 2017 Nov 19. PubMed PMID: 29152675.

114: Salindri AD, Sales RF, DiMiceli L, Schechter MC, Kempker RR, Magee MJ. Isoniazid Monoresistance and Rate of Culture Conversion among Patients in the State of Georgia with Confirmed Tuberculosis, 2009-2014. *Ann Am Thorac Soc*. 2018 Mar;15(3):331-340. doi: 10.1513/AnnalsATS.201702-147OC. PubMed PMID: 29131662; PubMed Central PMCID: PMC5880520.

115: Hashemian SM, Mortaz E, Jamaati H, Bagheri L, Mohajerani SA, Garssen J,

Movassaghi M, Barnes PJ, Hill NS, Adcock IM. Budesonide facilitates weaning from mechanical ventilation in difficult-to-wean very severe COPD patients: Association with inflammatory mediators and cells. *J Crit Care.* 2018 Apr;44:161-167. doi: 10.1016/j.jcrc.2017.10.045. Epub 2017 Oct 31. PubMed PMID: 29127842.

116: Mok J, Kang H, Hwang SH, Park JS, Kang B, Lee T, Koh WJ, Yim JJ, Jeon D. Interim outcomes of delamanid for the treatment of MDR- and XDR-TB in South Korea. *J Antimicrob Chemother.* 2018 Feb 1;73(2):503-508. doi: 10.1093/jac/dkx373. PubMed PMID: 29069496.

117: Marfina GY, Vladimirov KB, Avetisian AO, Starshinova AA, Kudriashov GG, Sokolovich EG, Yablonskii PK. Bilateral cavitory multidrug- or extensively drug-resistant tuberculosis: role of surgery. *Eur J Cardiothorac Surg.* 2018 Mar 1;53(3):618-624. doi: 10.1093/ejcts/ezx350. PubMed PMID: 29040413.

118: Schechter MC, Bizune D, Kagei M, Machaidze M, Holland DP, Oladele A, Wang YF, Rebolledo PA, Ray SM, Kempker RR. Time to Sputum Culture Conversion and Treatment Outcomes Among Patients with Isoniazid-Resistant Tuberculosis in Atlanta, Georgia. *Clin Infect Dis.* 2017 Nov 13;65(11):1862-1871. doi: 10.1093/cid/cix686. PubMed PMID: 29020173; PubMed Central PMCID: PMC5850645.

119: Svensson EM, Karlsson MO. Modelling of mycobacterial load reveals bedaquiline's exposure-response relationship in patients with drug-resistant TB. *J Antimicrob Chemother.* 2017 Dec 1;72(12):3398-3405. doi: 10.1093/jac/dkx317. PubMed PMID: 28961790; PubMed Central PMCID: PMC5890768.

120: Prins HJ, Duijkers R, Lutter R, Daniels JM, van der Valk P, Schoorl M, Kerstjens HA, van der Werf TS, Boersma WG. Blood eosinophilia as a marker of early and late treatment failure in severe acute exacerbations of COPD. *Respir*

Med. 2017 Oct;131:118-124. doi: 10.1016/j.rmed.2017.07.064. Epub 2017 Aug 1.  
PubMed PMID: 28947018.

121: Choreño Parra JA, Martínez Zañiga N, Salinas Lara C. Tuberculosis "the great imitator": False healing and subclinical activity. Indian J Tuberc. 2017 Oct;64(4):345-348. doi: 10.1016/j.ijtb.2017.05.006. Epub 2017 May 31. PubMed PMID: 28941864.

122: Pasipanodya JG, Ogbonna D, Deshpande D, Srivastava S, Gumbo T. Meta-analyses and the evidence base for microbial outcomes in the treatment of pulmonary Mycobacterium avium-intracellulare complex disease. J Antimicrob Chemother. 2017 Sep 1;72(suppl\_2):i3-i19. doi: 10.1093/jac/dkx311. Review. PubMed PMID: 28922813.

123: Pavord ID, Chanez P, Criner GJ, Kerstjens HAM, Korn S, Lugogo N, Martinot JB, Sagara H, Albers FC, Bradford ES, Harris SS, Mayer B, Rubin DB, Yancey SW, Sciurba FC. Mepolizumab for Eosinophilic Chronic Obstructive Pulmonary Disease. N Engl J Med. 2017 Oct 26;377(17):1613-1629. doi: 10.1056/NEJMoal708208. Epub 2017 Sep 11. PubMed PMID: 28893134.

124: Sudfeld CR, Manji KP, Duggan CP, Aboud S, Muhihi A, Sando DM, Al-Beity FMA, Wang M, Fawzi WW. Effect of maternal vitamin D(3) supplementation on maternal health, birth outcomes, and infant growth among HIV-infected Tanzanian pregnant women: study protocol for a randomized controlled trial. Trials. 2017 Sep 4;18(1):411. doi: 10.1186/s13063-017-2157-3. PubMed PMID: 28870263; PubMed Central PMCID: PMC5584035.

125: Banurekha V, Bhatnagar T, Savithri S, Kumar ND, Kangusamy B, Mehendale S. Sputum Conversion and Treatment Success among Tuberculosis Patients with Diabetes Treated under the Tuberculosis Control Programme in an Urban Setting in South India. Indian J Community Med. 2017 Jul-Sep;42(3):180-182. doi:

10.4103/ijcm.IJCM\_179\_16. PubMed PMID: 28852286; PubMed Central  
PMCID:  
PMC5561700.

126: Sakashita K, Fujita A, Takamori M, Nagai T, Matsumoto T, Saito  
T, Nakagawa  
T, Ogawa K, Shigeto E, Nakatsumi Y, Goto H, Mitarai S. Efficiency of  
the Lung  
Flute for sputum induction in patients with presumed pulmonary  
tuberculosis. Clin  
Respir J. 2018 Apr;12(4):1503-1509. doi: 10.1111/crj.12697. Epub  
2017 Sep 13.  
PubMed PMID: 28846200.

127: Saffari M, Jolandimi HA, Sehat M, Nejad NV, Hedayati M, Zamani  
M, Ghasemi A.  
Smear grading and the Mantoux skin test can be used to predict  
sputum smear  
conversion in patients suffering from tuberculosis. GMS Hyg Infect  
Control. 2017  
Aug 15;12:Doc12. doi: 10.3205/dgkh000297. eCollection 2017. PubMed  
PMID:  
28840092; PubMed Central PMCID: PMC5564005.

128: Altet N, Latorre I, Jimenez-Fuentes M, Maldonado J, Molina  
I, González-Díaz  
Y, Milán C, García-García E, Muriel B, Villar-Hernández R, Laabei  
M, Gómez AC,  
Godoy P, de Souza-Galvão ML, Solano S, Jiménez-Ruiz CA, Domínguez  
J; PII Smoking  
SEPAR Working Group. Assessment of the influence of direct tobacco  
smoke on  
infection and active TB management. PLoS One. 2017 Aug  
24;12(8):e0182998. doi:  
10.1371/journal.pone.0182998. eCollection 2017. PubMed PMID:  
28837570; PubMed  
Central PMCID: PMC5570217.

129: Mahakalkar SM, Nagrale D, Gaur S, Urade C, Murhar B, Turankar  
A.  
N-acetylcysteine as an add-on to Directly Observed Therapy Short-I  
therapy in  
fresh pulmonary tuberculosis patients: A randomized, placebo-  
controlled,  
double-blinded study. Perspect Clin Res. 2017 Jul-Sep;8(3):132-136.  
doi:  
10.4103/2229-3485.210450. PubMed PMID: 28828308; PubMed Central  
PMCID:  
PMC5543764.

130: Pasipanodya JG, Ogbonna D, Ferro BE, Magombedze G, Srivastava S, Deshpande D, Gumbo T. Systematic Review and Meta-analyses of the Effect of Chemotherapy on Pulmonary Mycobacterium abscessus Outcomes and Disease Recurrence. Antimicrob Agents Chemother. 2017 Oct 24;61(11). pii: e01206-17. doi: 10.1128/AAC.01206-17. Print 2017 Nov. PubMed PMID: 28807911; PubMed Central PMCID: PMC5655093.

131: Jacobson DL, Stephensen CB, Miller TL, Patel K, Chen JS, Van Dyke RB, Mirza A, Schuster GU, Hazra R, Ellis A, Brummel SS, Geffner ME, Silio M, Spector SA, DiMeglio LA; Pediatric HIV/AIDS Cohort Study. Associations of Low Vitamin D and Elevated Parathyroid Hormone Concentrations With Bone Mineral Density in Perinatally HIV-Infected Children. J Acquir Immune Defic Syndr. 2017 Sep 1;76(1):33-42. doi: 10.1097/QAI.0000000000001467. PubMed PMID: 28797019; PubMed Central PMCID: PMC5624211.

132: Yagi K, Ishii M, Namkoong H, Asami T, Iketani O, Asakura T, Suzuki S, Sugiura H, Yamada Y, Nishimura T, Fujiwara H, Funatsu Y, Uwamino Y, Kamo T, Tasaka S, Betsuyaku T, Hasegawa N. The efficacy, safety, and feasibility of inhaled amikacin for the treatment of difficult-to-treat non-tuberculous mycobacterial lung diseases. BMC Infect Dis. 2017 Aug 9;17(1):558. doi: 10.1186/s12879-017-2665-5. PubMed PMID: 28793869; PubMed Central PMCID: PMC5550988.

133: Osei FA, Enimil A, Ansong D, Laryea DO, Mensah NK, Amuzu EX, Agyemang EO, Sarpong PO, Nyanor I, Dekugmen Yar D. Review of Organism Density and Bacteriologic Conversion of Sputum among Tuberculosis Patients. Int Sch Res Notices. 2017 Jul 11;2017:7052583. doi: 10.1155/2017/7052583. eCollection 2017. Review. PubMed PMID: 28781995; PubMed Central PMCID: PMC5525070.

134: Prajapati K, Mishra V, Desai M, Solanki R, Naik P. Treatment outcome of patients having extensively drug-resistant tuberculosis in Gujarat, India. Int J

Mycobacteriol. 2017 Jul-Sep;6(3):289-295. doi:  
10.4103/ijmy.ijmy\_59\_17. PubMed  
PMID: 28776529.

135: Agrawal Y, Goyal V, Singh A, Lal S. Role of Anaemia and Magnesium Levels at the Initiation of Tuberculosis Therapy with Sputum Conversion among Pulmonary Tuberculosis Patients. J Clin Diagn Res. 2017 Jun;11(6):BC01-BC04. doi:  
10.7860/JCDR/2017/23734.9975. Epub 2017 Jun 1. PubMed PMID: 28764146; PubMed Central PMCID: PMC5535339.

136: Choi H, Kim SY, Kim DH, Huh HJ, Ki CS, Lee NY, Lee SH, Shin S, Shin SJ, Daley CL, Koh WJ. Clinical Characteristics and Treatment Outcomes of Patients with Acquired Macrolide-Resistant Mycobacterium abscessus Lung Disease. Antimicrob Agents Chemother. 2017 Sep 22;61(10). pii: e01146-17. doi:  
10.1128/AAC.01146-17. Print 2017 Oct. PubMed PMID: 28739795; PubMed Central PMCID: PMC5610486.

137: Nduba V, Van't Hoog AH, Mitchell EMH, Borgdorff M, Laserson KF. Incidence of Active Tuberculosis and Cohort Retention Among Adolescents in Western Kenya. Pediatr Infect Dis J. 2018 Jan;37(1):10-15. doi:  
10.1097/INF.0000000000001685. PubMed PMID: 28719498.

138: Magee MJ, Sun YV, Brust JCM, Shah NS, Ning Y, Allana S, Campbell A, Hui Q, Mlisana K, Moodley P, Gandhi NR. Polymorphisms in the vitamin D receptor gene are associated with reduced rate of sputum culture conversion in multidrug-resistant tuberculosis patients in South Africa. PLoS One. 2017 Jul 10;12(7):e0180916. doi:  
10.1371/journal.pone.0180916. eCollection 2017. PubMed PMID: 28700743; PubMed Central PMCID: PMC5507304.

139: Gunda DW, Nkandala I, Kavishe GA, Kilonzo SB, Kabangila R, Mpondo BC. Prevalence and Risk Factors of Delayed Sputum Conversion among Patients Treated

for Smear Positive PTB in Northwestern Rural Tanzania: A Retrospective Cohort Study. *J Trop Med*. 2017;2017:5352906. doi: 10.1155/2017/5352906. Epub 2017 Jun 11. PubMed PMID: 28694828; PubMed Central PMCID: PMC5485336.

140: Ganmaa D, Munkhzul B, Fawzi W, Spiegelman D, Willett WC, Bayasgalan P, Baasansuren E, Buyankhishig B, Oyun-Erdene S, Jolliffe DA, Xenakis T, Bromage S, Bloom BR, Martineau AR. High-Dose Vitamin D(3) during Tuberculosis Treatment in Mongolia. A Randomized Controlled Trial. *Am J Respir Crit Care Med*. 2017 Sep 1;196(5):628-637. doi: 10.1164/rccm.201705-0936OC. PubMed PMID: 28692301; PubMed Central PMCID: PMC5620670.

141: D'Souza KA, Zaidi SMA, Jaswal M, Butt S, Khowaja S, Habib SS, Malik AA. Factors associated with month 2 smear non-conversion among Category 1 tuberculosis patients in Karachi, Pakistan. *J Infect Public Health*. 2018 Mar - Apr;11(2):283-285. doi: 10.1016/j.jiph.2017.06.009. Epub 2017 Jun 26. PubMed PMID: 28662884.

142: Zhu L, Yang YZ, Guan HY, Cheng SM, Jin YY, Tan WG, Wu QF, Liu XL, Zhao MG, Lu ZH, Jia ZW. Trends in drug-resistant tuberculosis after the implementation of the DOTS strategy in Shenzhen, China, 2000-2013. *Int J Tuberc Lung Dis*. 2017 Jul 1;21(7):759-765. doi: 10.5588/ijtld.16.0759. PubMed PMID: 28633700.

143: Sharma SK, Katoch K, Sarin R, Balambal R, Kumar Jain N, Patel N, Murthy KJR, Singla N, Saha PK, Khanna A, Singh U, Kumar S, Sengupta A, Banavaliker JN, Chauhan DS, Sachan S, Wasim M, Tripathi S, Dutt N, Jain N, Joshi N, Penmesta SRR, Gaddam S, Gupta S, Khamar B, Dey B, Mitra DK, Arora SK, Bhaskar S, Rani R. Efficacy and Safety of *Mycobacterium indicus pranii* as an adjunct therapy in Category II pulmonary tuberculosis in a randomized trial. *Sci Rep*. 2017 Jun 13;7(1):3354. doi: 10.1038/s41598-017-03514-1. PubMed PMID: 28611374; PubMed Central PMCID: PMC5469738.

144: Hasanain AFA, Zayed AAH, Mahdy RE, Nafee AMA. Cholecalciferol for prophylaxis against antituberculosis therapy-induced liver disorders among naïve patients with pulmonary tuberculosis: A randomized, comparative study. *Int J Mycobacteriol.* 2017 Apr-Jun;6(2):149-155. doi: 10.4103/ijmy.ijmy\_19\_17. PubMed PMID: 28559516.

145: Eriksson G, Calverley PM, Jenkins CR, Anzueto AR, Make BJ, Lindberg M, Fagerås M, Postma DS. The effect of COPD severity and study duration on exacerbation outcome in randomized controlled trials. *Int J Chron Obstruct Pulmon Dis.* 2017 May 15;12:1457-1468. doi: 10.2147/COPD.S130713. eCollection 2017. PubMed PMID: 28553098; PubMed Central PMCID: PMC5440002.

146: Pan SW, Shu CC, Feng JY, Wang JY, Chan YJ, Yu CJ, Su WJ. Microbiological Persistence in Patients With Mycobacterium avium Complex Lung Disease: The Predictors and the Impact on Radiographic Progression. *Clin Infect Dis.* 2017 Sep 15;65(6):927-934. doi: 10.1093/cid/cix479. PubMed PMID: 28541556.

147: Borisov SE, Dheda K, Enwerem M, Romero Leyet R, D'Ambrosio L, Centis R, Sotgiu G, Tiberi S, Alffenaar JW, Maryandyshev A, Belilovski E, Ganatra S, Skrahina A, Akkerman O, Aleksa A, Amale R, Artsukevich J, Bruchfeld J, Caminero JA, Carpena Martinez I, Codecasa L, Dalcolmo M, Denholm J, Douglas P, Duarte R, Esmail A, Fadul M, Filippov A, Davies Forsman L, Gaga M, Garcia-Fuertes JA, García-García JM, Gualano G, Jonsson J, Kunst H, Lau JS, Lazaro Mastrapa B, Teran Troya JL, Manga S, Manika K, González Montaner P, Mullerpattan J, Oelofse S, Ortelli M, Palmero DJ, Palmieri F, Papalia A, Papavasileiou A, Payen MC, Pontali E, Robalo Cordeiro C, Sadleri L, Sadutshang TD, Sanukevich T, Solodovnikova V, Spanevello A, Topgyal S, Toscanini F, Tramontana AR, Udwadia ZF, Viggiani P, White V, Zumla A, Migliori GB. Effectiveness and safety of bedaquiline-containing regimens in the treatment of MDR- and XDR-TB: a multicentre study. *Eur Respir J.*

2017 May 21;49(5). pii: 1700387. doi: 10.1183/13993003.00387-2017.  
Print 2017  
May. PubMed PMID: 28529205.

148: Salekzamani S, Babil AS, Mehralizadeh H, Jafarabadi MA, Ghezel A, Gargari BP. The effects of vitamin D supplementation on proatherogenic inflammatory markers and carotid intima media thickness in subjects with metabolic syndrome: a randomized double-blind placebo-controlled clinical trial. *Endocrine*. 2017 Jul;57(1):51-59. doi: 10.1007/s12020-017-1317-2. Epub 2017 May 16. PubMed PMID: 28509078.

149: Xu P, Chen H, Xu J, Wu M, Zhu X, Wang F, Chen S, Xu J. Moxifloxacin is an effective and safe candidate agent for tuberculosis treatment: a meta-analysis. *Int J Infect Dis*. 2017 Jul;60:35-41. doi: 10.1016/j.ijid.2017.05.003. Epub 2017 May 8. Review. PubMed PMID: 28495364.

150: Ferrian S, Manca C, Lubbe S, Conradie F, Ismail N, Kaplan G, Gray CM, Fallows D. A combination of baseline plasma immune markers can predict therapeutic response in multidrug resistant tuberculosis. *PLoS One*. 2017 May 2;12(5):e0176660. doi: 10.1371/journal.pone.0176660. eCollection 2017. PubMed PMID: 28464011; PubMed Central PMCID: PMC5413057.

151: Diel R, Ringshausen F, Richter E, Welker L, Schmitz J, Nienhaus A. Microbiological and Clinical Outcomes of Treating Non-Myco**a**cterium Avium Complex Nontuberculous Mycobacterial Pulmonary Disease: A Systematic Review and Meta-Analysis. *Chest*. 2017 Jul;152(1):120-142. doi: 10.1016/j.chest.2017.04.166. Epub 2017 Apr 28. Review. PubMed PMID: 28461147.

152: Vinhas SA, Jones-LÃ³pez EC, Ribeiro Rodrigues R, Gaeddert M, Peres RL, Marques-Rodrigues P, de Aguiar PPL, White LF, Alland D, Salgame P, Hom D, Ellner JJ, Dietze R, Collins LF, Shashkina E, Kreiswirth B, Palaci M. Strains of

Mycobacterium tuberculosis transmitting infection in Brazilian households and those associated with community transmission of tuberculosis. Tuberculosis (Edinb). 2017 May;104:79-86. doi: 10.1016/j.tube.2017.03.003. Epub 2017 Mar 16. PubMed PMID: 28454653; PubMed Central PMCID: PMC5716464.

153: Atwine D, Orikiriza P, Taremwa I, Ayebare A, Logoose S, Mwanga-Amumpaire J, Jindani A, Bonnet M. Predictors of delayed culture conversion among Ugandan patients. BMC Infect Dis. 2017 Apr 24;17(1):299. doi: 10.1186/s12879-017-2335-7. PubMed PMID: 28438118; PubMed Central PMCID: PMC5402635.

154: Crowley J, Thaçi D, Joly P, Peris K, Papp KA, Goncalves J, Day RM, Chen R, Shah K, Ferrándiz C, Cather JC. Long-term safety and tolerability of apremilast in patients with psoriasis: Pooled safety analysis for 156 weeks from 2 phase 3, randomized, controlled trials (ESTEEM 1 and 2). J Am Acad Dermatol. 2017 Aug;77(2):310-317.e1. doi: 10.1016/j.jaad.2017.01.052. Epub 2017 Apr 14. PubMed PMID: 28416342.

155: Ukwaja KN, Alobu I, Gidado M, Onazi O, Oshi DC. Economic support intervention improves tuberculosis treatment outcomes in rural Nigeria. Int J Tuberc Lung Dis. 2017 May 1;21(5):564-570. doi: 10.5588/ijtld.16.0741. PubMed PMID: 28399972.

156: Miranda P, Gil-Santana L, Oliveira MG, Mesquita ED, Silva E, Rauwerdink A, Cobelens F, Oliveira MM, Andrade BB, Kritski A. Sustained elevated levels of C-reactive protein and ferritin in pulmonary tuberculosis patients remaining culture positive upon treatment initiation. PLoS One. 2017 Apr 6;12(4):e0175278. doi: 10.1371/journal.pone.0175278. eCollection 2017. PubMed PMID: 28384354; PubMed Central PMCID: PMC5383283.

157: Jhun BW, Kim SY, Park HY, Jeon K, Shin SJ, Koh WJ. Changes in Serum IgA

Antibody Levels against the Glycopeptidolipid Core Antigen during Antibiotic Treatment of Mycobacterium avium Complex Lung Disease. Jpn J Infect Dis. 2017 Sep 25;70(5):582-585. doi: 10.7883/yoken.JJID.2016.523. Epub 2017 Mar 28. PubMed PMID: 28367886.

158: Mahishale V, Avuthu S, Patil B, Lolly M, Eti A, Khan S. Effect of Poor Glycemic Control in Newly Diagnosed Patients with Smear-Positive Pulmonary Tuberculosis and Type-2 Diabetes Mellitus. Iran J Med Sci. 2017 Mar;42(2):144-151. PubMed PMID: 28360440; PubMed Central PMCID: PMC5366362.

159: Yang B, Jhun BW, Moon SM, Lee H, Park HY, Jeon K, Kim DH, Kim SY, Shin SJ, Daley CL, Koh WJ. Clofazimine-Containing Regimen for the Treatment of Mycobacterium abscessus Lung Disease. Antimicrob Agents Chemother. 2017 May 24;61(6). pii: e02052-16. doi: 10.1128/AAC.02052-16. Print 2017 Jun. PubMed PMID: 28348153; PubMed Central PMCID: PMC5444135.

160: Valenzuela F, de la Cruz Fernandez C, Galimberti RL, GÃ¼rbÃ¼z S, McKean-Matthews M, Goncalves L, Romiti R. Comparison of ixekizumab with etanercept or placebo in moderate-to-severe psoriasis: Subgroup analysis of Latin American patients in the phase 3 randomized UNCOVER-3 study. Actas Dermosifiliogr. 2017 Jul - Aug;108(6):550-563. doi: 10.1016/j.ad.2017.02.005. Epub 2017 Mar 23. English, Spanish. PubMed PMID: 28342534.

161: Lu P, Liu Q, Martinez L, Yang H, Lu W, Ding X, Zhu L. Time to sputum culture conversion and treatment outcome of patients with multidrug-resistant tuberculosis: a prospective cohort study from urban China. Eur Respir J. 2017 Mar 22;49(3). pii: 1601558. doi: 10.1183/13993003.01558-2016. Print 2017 Mar. PubMed PMID: 28331033; PubMed Central PMCID: PMC5380874.

162: Bastos ML, Lan Z, Menzies D. An updated systematic review and meta-analysis for treatment of multidrug-resistant tuberculosis. Eur Respir J. 2017 Mar

22;49(3). pii: 1600803. doi: 10.1183/13993003.00803-2016. Print 2017 Mar. Review.  
PubMed PMID: 28331031.

163: Proaño A, Bravard MA, López JW, Lee GO, Bui D, Datta S, Comina G, Zimic M, Coronel J, Caviedes L, Cabrera JL, Salas A, Ticona E, Vu NM, Kirwan DE, Loader MI, Friedland JS, Moore DAJ, Evans CA, Tracey BH, Gilman RH; Tuberculosis Working Group in Peru. Dynamics of Cough Frequency in Adults Undergoing Treatment for Pulmonary Tuberculosis. *Clin Infect Dis*. 2017 May 1;64(9):1174-1181. doi: 10.1093/cid/cix039. PubMed PMID: 28329268; PubMed Central PMCID: PMC5399950.

164: Mundra A, Deshmukh PR, Dawale A. Magnitude and determinants of adverse treatment outcomes among tuberculosis patients registered under Revised National Tuberculosis Control Program in a Tuberculosis Unit, Wardha, Central India: A record-based cohort study. *J Epidemiol Glob Health*. 2017 Jun;7(2):111-118. doi: 10.1016/j.jegh.2017.02.002. Epub 2017 Mar 18. PubMed PMID: 28315657.

165: Hwang JA, Kim S, Jo KW, Shim TS. Natural history of *Mycobacterium avium* complex lung disease in untreated patients with stable course. *Eur Respir J*. 2017 Mar 8;49(3). pii: 1600537. doi: 10.1183/13993003.00537-2016. Print 2017 Mar. PubMed PMID: 28275170.

166: Kadota JI, Kurashima A, Suzuki K. The clinical efficacy of a clarithromycin-based regimen for *Mycobacterium avium* complex disease: A nationwide post-marketing study. *J Infect Chemother*. 2017 May;23(5):293-300. doi: 10.1016/j.jiac.2017.01.007. Epub 2017 Feb 27. PubMed PMID: 28254517.

167: Rockwood N, Wojno J, Ghebrekristos Y, Nicol MP, Meintjes G, Wilkinson RJ. Utility of Second-Generation Line Probe Assay (Hain MTBDRplus) Directly on 2-Month Sputum Specimens for Monitoring Tuberculosis Treatment Response. *J Clin Microbiol*. 2017 May;55(5):1508-1515. doi: 10.1128/JCM.00025-17. Epub 2017 Mar 1. PubMed PMID: 28249999; PubMed Central PMCID: PMC5405268.

168: Leung CC, Yew WW, Mok TYW, Lau KS, Wong CF, Chau CH, Chan CK, Chang KC, Tam G, Tam CM. Effects of diabetes mellitus on the clinical presentation and treatment response in tuberculosis. *Respirology*. 2017 Aug;22(6):1225-1232. doi: 10.1111/resp.13017. Epub 2017 Feb 28. PubMed PMID: 28244689.

169: Masjedi MR, Hosseini M, Aryanpur M, Mortaz E, Tabarsi P, Soori H, Emami H, Heidari G, Dizagie MK, Baikpour M. The effects of smoking on treatment outcome in patients newly diagnosed with pulmonary tuberculosis. *Int J Tuberc Lung Dis*. 2017 Mar 1;21(3):351-356. doi: 10.5588/ijtld.16.0513. PubMed PMID: 28225348.

170: Scott C, Cavanaugh JS, Silk BJ, Ershova J, Mazurek GH, LoBue PA, Moonan PK. Comparison of Sputum-Culture Conversion for *Mycobacterium bovis* and *M. tuberculosis*. *Emerg Infect Dis*. 2017 Mar;23(3):456-462. doi: 10.3201/eid2303.161916. PubMed PMID: 28221125; PubMed Central PMCID: PMC5382750.

171: Rockwood N, Pasipanodya JG, Denti P, Sirgel F, Lesosky M, Gumbo T, Meintjes G, McIlleron H, Wilkinson RJ. Concentration-Dependent Antagonism and Culture Conversion in Pulmonary Tuberculosis. *Clin Infect Dis*. 2017 May 15;64(10):1350-1359. doi: 10.1093/cid/cix158. PubMed PMID: 28205671; PubMed Central PMCID: PMC5411399.

172: Lee JY, Kim DK, Lee JK, Yoon HI, Jeong I, Heo E, Park YS, Lee JH, Park SS, Lee SM, Lee CH, Lee J, Choi SM, Park JS, Joh JS, Cho YJ, Lee YJ, Kim SJ, Hwang YR, Kim H, Ki J, Choi H, Han J, Ahn H, Hahn S, Yim JJ. Substitution of ethambutol with linezolid during the intensive phase of treatment of pulmonary tuberculosis: study protocol for a prospective, multicenter, randomized, open-label, phase II trial. *Trials*. 2017 Feb 13;18(1):68. doi: 10.1186/s13063-017-1811-0. PubMed PMID: 28193240; PubMed Central PMCID: PMC5307889.

173: Nouhin J, Pean P, Madec Y, Chevalier MF, Didier C, Borand L, Blanc FX, Scott-Algara D, Laureillard D, Weiss L. Interleukin-1 receptor antagonist, a biomarker of response to anti-TB treatment in HIV/TB co-infected patients. *J Infect.* 2017 May;74(5):456-465. doi: 10.1016/j.jinf.2017.01.016. Epub 2017 Feb 9. PubMed PMID: 28189712.

174: Lee EH, Lee JM, Kang YA, Leem AY, Kim EY, Jung JY, Park MS, Kim YS, Kim SK, Chang J, Kim SY. Prevalence and Impact of Diabetes Mellitus Among Patients with Active Pulmonary Tuberculosis in South Korea. *Lung.* 2017 Apr;195(2):209-215. doi: 10.1007/s00408-017-9978-4. Epub 2017 Feb 9. PubMed PMID: 28184994.

175: Sudfeld CR, Mugusi F, Aboud S, Nagu TJ, Wang M, Fawzi WW. Efficacy of vitamin D(3) supplementation in reducing incidence of pulmonary tuberculosis and mortality among HIV-infected Tanzanian adults initiating antiretroviral therapy: study protocol for a randomized controlled trial. *Trials.* 2017 Feb 10;18(1):66. doi: 10.1186/s13063-017-1819-5. PubMed PMID: 28183335; PubMed Central PMCID: PMC5301352.

176: Migliori GB, Pontali E, Sotgiu G, Centis R, D'Ambrosio L, Tiberi S, Tadolini M, Esposito S. Combined Use of Delamanid and Bedaquiline to Treat Multidrug-Resistant and Extensively Drug-Resistant Tuberculosis: A Systematic Review. *Int J Mol Sci.* 2017 Feb 7;18(2). pii: E341. doi: 10.3390/ijms18020341. Review. PubMed PMID: 28178199; PubMed Central PMCID: PMC5343876.

177: Tenforde MW, Yadav A, Dowdy DW, Gupte N, Shivakoti R, Yang WT, Mwelase N, Kanyama C, Pillay S, Samaneka W, Santos B, Poongulali S, Tripathy S, Riviere C, Berendes S, Lama JR, Cardoso SW, Sugandhavesa P, Christian P, Semba RD, Campbell TB, Gupta A; NWCS319 and ACTG 5175 study team. Vitamin A and D Deficiencies Associated With Incident Tuberculosis in HIV-Infected Patients Initiating Antiretroviral Therapy in Multinational Case-Cohort Study. *J Acquir Immune Defic*

Syndr. 2017 Jul 1;75(3):e71-e79. doi: 10.1097/QAI.0000000000001308.  
PubMed PMID:  
28169875; PubMed Central PMCID: PMC5472489.

178: Alkabab Y, Keller S, Dodge D, Houpt E, Staley D, Heysell S.  
Early  
interventions for diabetes related tuberculosis associate with  
hastened sputum  
microbiological clearance in Virginia, USA. BMC Infect Dis. 2017 Feb  
6;17(1):125.  
doi: 10.1186/s12879-017-2226-y. PubMed PMID: 28166721; PubMed  
Central PMCID:  
PMC5294910.

179: Al-Shaer MH, Mansour H, Elewa H, Salameh P, Iqbal F. Treatment  
outcomes of  
fixed-dose combination versus separate tablet regimens in pulmonary  
tuberculosis  
patients with or without diabetes in Qatar. BMC Infect Dis. 2017 Feb  
2;17(1):118.  
doi: 10.1186/s12879-017-2231-1. PubMed PMID: 28152986; PubMed  
Central PMCID:  
PMC5290647.

180: Ebers A, Stroup S, Mpagama S, Kisonga R, Lekule I, Liu J,  
Heysell S.  
Determination of plasma concentrations of levofloxacin by high  
performance liquid  
chromatography for use at a multidrug-resistant tuberculosis  
hospital in  
Tanzania. PLoS One. 2017 Jan 31;12(1):e0170663. doi:  
10.1371/journal.pone.0170663. eCollection 2017. PubMed PMID:  
28141813; PubMed  
Central PMCID: PMC5283651.

181: Savic RM, Weiner M, MacKenzie WR, Engle M, Whitworth WC,  
Johnson JL, Nsubuga  
P, Nahid P, Nguyen NV, Peloquin CA, Dooley KE, Dorman SE;  
Tuberculosis Trials  
Consortium of the Centers for Disease Control and Prevention.  
Defining the  
optimal dose of rifapentine for pulmonary tuberculosis: Exposure-  
response  
relations from two phase II clinical trials. Clin Pharmacol Ther.  
2017  
Aug;102(2):321-331. doi: 10.1002/cpt.634. Epub 2017 Mar 2. PubMed  
PMID: 28124478;  
PubMed Central PMCID: PMC5545752.

182: Ko Y, Shin JH, Lee HK, Lee YS, Lee SY, Park SY, Mo EK, Kim C,  
Park YB.

Duration of Pulmonary Tuberculosis Infectiousness under Adequate Therapy, as Assessed Using Induced Sputum Samples. *Tuberc Respir Dis (Seoul)*. 2017 Jan;80(1):27-34. doi: 10.4046/trd.2017.80.1.27. Epub 2016 Dec 30. PubMed PMID: 28119744; PubMed Central PMCID: PMC5256343.

183: SchÃ¶n T, Chryssanthou E. Minimum inhibitory concentration distributions for *Mycobacterium avium* complex-towards evidence-based susceptibility breakpoints. *Int J Infect Dis*. 2017 Feb;55:122-124. doi: 10.1016/j.ijid.2016.12.027. Epub 2017 Jan 6. PubMed PMID: 28069470.

184: Toujani S, Ben Safta B, Ben Salah N, Mjid M, Ouahchi Y, Louzir B, Daghfous J, Cherif J, Mehiri N, Beji M. Contribution of fixed-dose combinations in the treatment of tuberculosis. *Tunis Med*. 2016 Jul;94(7):401-405. PubMed PMID: 28051229.

185: MuÃ±oz-Torrico M, Caminero Luna J, Migliori GB, D'Ambrosio L, Carrillo-Alduenda JL, Villareal-Velarde H, Torres-Cruz A, Flores-Ergara H, MartÃ­nez-Mendoza D, GarcÃ­a-Sancho C, Centis R, Salazar-Lezama MÃ©, PÃ©rez-Padilla R. Comparison of bacteriological conversion and treatment outcomes among MDR-TB patients with and without diabetes in Mexico: Preliminary data. *Rev Port Pneumol* (2006). 2017 Jan - Feb;23(1):27-30. doi: 10.1016/j.rppnen.2016.11.009. Epub 2016 Dec 31. PubMed PMID: 28043788.

186: Skrahina A, Hurevich H, Falzon D, Zhilevich L, Rusovich V, Dara M, Setkina S. Bedaquiline in the multidrug-resistant tuberculosis treatment: Belarus experience. *Int J Mycobacteriol*. 2016 Dec;5 Suppl 1:S62-S63. doi: 10.1016/j.ijmyco.2016.11.014. Epub 2016 Nov 23. PubMed PMID: 28043617.

187: Fennelly KP. What is in a cough? *Int J Mycobacteriol*. 2016 Dec;5 Suppl 1:S51. doi: 10.1016/j.ijmyco.2016.10.037. Epub 2016 Nov 25. PubMed PMID: 28043607.

188: Diarra B, Cissé AB, Kodio O, Sanogo M, Baya B, Togo AC, Somboro A, Tolofouidi M, Degoga B, Keita ML, Diallo F, Nguiakam N, Coulibaly G, Bane S, Sarro YD, Doumbia S, Murphy RL, Diallo S, Dejong BC. Screening new tuberculosis patients in Mali for rifampicin resistance at 2months. *Int J Mycobacteriol.* 2016 Dec;5 Suppl 1:S42-S43. doi: 10.1016/j.ijmyco.2016.09.052. Epub 2016 Nov 11. PubMed PMID: 28043602.

189: Hu Y, Zheng X, Ning Z, Li Q, Zhang Z, Hoffner S. Impact of genotypic and phenotypic resistance to second-line anti-tuberculosis drugs on treatment outcomes in multidrug-resistant tuberculosis in China. *Int J Mycobacteriol.* 2016 Dec;5 Suppl 1:S34-S35. doi: 10.1016/j.ijmyco.2016.11.007. Epub 2016 Nov 22. PubMed PMID: 28043597.

190: Calverley PM, Eriksson G, Jenkins CR, Anzueto AR, Make BJ, Persson A, Fagerås M, Postma DS. Early efficacy of budesonide/formoterol in patients with moderate-to-very-severe COPD. *Int J Chron Obstruct Pulmon Dis.* 2016 Dec 19;12:13-25. doi: 10.2147/COPD.S114209. eCollection 2017. PubMed PMID: 28031707; PubMed Central PMCID: PMC5182036.

191: Zheng X, Ning Z, Drobniewski F, Yang J, Li Q, Zhang Z, Hu Y. *pncA* mutations are associated with slower sputum conversion during standard treatment of multidrug-resistant tuberculosis. *Int J Antimicrob Agents.* 2017 Feb;49(2):183-188. doi: 10.1016/j.ijantimicag.2016.10.012. Epub 2016 Nov 24. PubMed PMID: 28012685.

192: Park J, Cho J, Lee CH, Han SK, Yim JJ. Progression and Treatment Outcomes of Lung Disease Caused by *Mycobacterium abscessus* and *Mycobacterium massiliense*. *Clin Infect Dis.* 2017 Feb 1;64(3):301-308. doi: 10.1093/cid/ciw723. Epub 2016 Nov 10. Erratum in: *Clin Infect Dis.* 2017 May 15;64(10):1469. PubMed PMID: 28011609.

193: Koh WJ, Jeong BH, Kim SY, Jeon K, Park KU, Jhun BW, Lee H, Park HY, Kim DH, Huh HJ, Ki CS, Lee NY, Kim HK, Choi YS, Kim J, Lee SH, Kim CK, Shin SJ, Daley CL, Kim H, Kwon OJ. Mycobacterial Characteristics and Treatment Outcomes in Mycobacterium abscessus Lung Disease. Clin Infect Dis. 2017 Feb 1;64(3):309-316. doi: 10.1093/cid/ciw724. Epub 2016 Nov 10. PubMed PMID: 28011608.

194: Vashakidze S, Despuig A, Gogishvili S, Nikolaishvili K, Shubladze N, Avaliani Z, Tukvadze N, Casals M, Caylã JA, Cardona PJ, Vilaplana C. Retrospective study of clinical and lesion characteristics of patients undergoing surgical treatment for Pulmonary Tuberculosis in Georgia. Int J Infect Dis. 2017 Mar;56:200-207. doi: 10.1016/j.ijid.2016.12.009. Epub 2016 Dec 19. Review. PubMed PMID: 28007659; PubMed Central PMCID: PMC5660856.

195: Mbatchou Ngahane BH, Dahirou F, Tchiche C, Wandji A, Ngniã C, Nana-Metchedjin A, Nyankiyã E, Endale Mangamba ML, Kuaban C. Clinical characteristics and outcomes of tuberculosis in Douala, Cameroon: a 7-year retrospective cohort study. Int J Tuberc Lung Dis. 2016 Dec 1;20(12):1609-1614. doi: 10.5588/ijtld.15.0731. PubMed PMID: 28000583.

196: Arnold A, Cooke GS, Kon OM, Dedicoat M, Lipman M, Loyse A, Butcher PD, Ster IC, Harrison TS. Drug resistant TB: UK multicentre study (DRUMS): Treatment, management and outcomes in London and West Midlands 2008-2014. J Infect. 2017 Mar;74(3):260-271. doi: 10.1016/j.jinf.2016.12.005. Epub 2016 Dec 18. PubMed PMID: 27998752.

197: Liebenberg JJ, Dold CJ, Olivier LR. A prospective investigation into the effect of colchicine on tuberculous pericarditis. Cardiovasc J Afr. 2016 Nov/Dec;27(6):350-355. doi: 10.5830/CVJA-2016-035. PubMed PMID: 27965998; PubMed Central PMCID: PMC5412665.

198: Velayutham B, Nair D, Kannan T, Padmapriyadarsini C, Sachdeva KS, Bency J,

Klinton JS, Haldar S, Khanna A, Jayasankar S, Swaminathan S. Factors associated with sputum culture conversion in multidrug-resistant pulmonary tuberculosis. *Int J Tuberc Lung Dis*. 2016 Dec;20(12):1671-1676. PubMed PMID: 27931345.

199: Park HO, Kim SH, Moon SH, Byun JH, Kim JW, Lee CE, Kim JD, Jang IS, Yang JH. Association between Body Mass Index and Sputum Culture Conversion among South Korean Patients with Multidrug Resistant Tuberculosis in a Tuberculosis Referral Hospital. *Infect Chemother*. 2016 Dec;48(4):317-323. doi: 10.3947/ic.2016.48.4.317. Epub 2016 Nov 21. PubMed PMID: 27883374; PubMed Central PMCID: PMC5204011.

200: Batbold U, Butov DO, Kutsyna GA, Damdinpurev N, Grinishina EA, Mijiddorj O, Kovolev ME, Baasanjav K, Butova TS, Sandagdorj M, Batbold O, Tseveendorj A, Chunt E, Zaitzeva SI, Stepanenko HL, Makeeva NI, Mospan IV, Pylypchuk VS, Rowe JL, Nyasulu P, Jirathitikal V, Bain AI, Tarakanovskaya MG, Bourinbaiar AS. Double-blind, placebo-controlled, 1:1 randomized Phase III clinical trial of Immunoxel honey lozenges as an adjunct immunotherapy in 269 patients with pulmonary tuberculosis. *Immunotherapy*. 2017 Jan;9(1):13-24. doi: 10.2217/imt-2016-0079. Epub 2016 Nov 21. PubMed PMID: 27868466.

201: Padmapriyadarsini C, Shobana M, Lakshmi M, Beena T, Swaminathan S. Undernutrition & tuberculosis in India: Situation analysis & the way forward. *Indian J Med Res*. 2016 Jul;144(1):11-20. doi: 10.4103/0971-5916.193278. Review. PubMed PMID: 27834321; PubMed Central PMCID: PMC5116882.

202: Vora A, Patel S, Patel K. Role of Risorine in the Treatment of Drug - Susceptible Pulmonary Tuberculosis: A Pilot Study. *J Assoc Physicians India*. 2016 Nov;64(11):20-24. PubMed PMID: 27805329.

203: Okumura M, Yoshiyama T. [EXPERIENCE OF USE OF NEW ANTI-TUBERCULOUS DRUG, DELAMANID IN MULTI- AND EXTENSIVELY DRUG RESISTANT TUBERCULOSIS CASES IN OUR

HOSPITAL]. Kekkaku. 2016 Nov;91(11-12):699-702. Japanese. PubMed  
PMID: 30648372.

204: Choi R, Kim K, Kim MJ, Kim SY, Kwon OJ, Jeon K, Park HY, Jeong  
BH, Shin SJ,  
Koh WJ, Lee SY. Serum inflammatory profiles in pulmonary  
tuberculosis and their  
association with treatment response. J Proteomics. 2016 Oct  
21;149:23-30. doi:  
10.1016/j.jprot.2016.06.016. Epub 2016 Jun 15. PubMed PMID:  
27321581.

205: Salekzamani S, Mehralizadeh H, Ghezel A, Salekzamani Y,  
Jafarabadi MA, Babil  
AS, Gargari BP. Effect of high-dose vitamin D supplementation on  
cardiometabolic  
risk factors in subjects with metabolic syndrome: a randomized  
controlled  
double-blind clinical trial. J Endocrinol Invest. 2016  
Nov;39(11):1303-1313. Epub  
2016 Jul 11. PubMed PMID: 27400997.

206: Olivier KN, Griffith DE, Eagle G, McGinnis JP 2nd, Micioni L,  
Liu K, Daley  
CL, Winthrop KL, Ruoss S, Addrizzo-Harris DJ, Flume PA, Dorgan D,  
Salathe M,  
Brown-Elliott BA, Gupta R, Wallace RJ Jr. Randomized Trial of  
Liposomal Amikacin  
for Inhalation in Nontuberculous Mycobacterial Lung Disease. Am J  
Respir Crit  
Care Med. 2017 Mar 15;195(6):814-823. doi: 10.1164/rccm.201604-  
0700OC. PubMed  
PMID: 27748623; PubMed Central PMCID: PMC5363966.

207: Fletcher R, Jones JD, Shah NS. Treatment of Active Tuberculosis  
in Chicago,  
2008-2011: The Role of Public Health Departments. PLoS One. 2016 Oct  
12;11(10):e0164162. doi: 10.1371/journal.pone.0164162. eCollection  
2016. PubMed  
PMID: 27732650; PubMed Central PMCID: PMC5061361.

208: Paião DS, Lemos EF, Carbone AD, Sgarbi RV, Junior AL, da Silva  
FM, Brandão  
LM, Dos Santos LS, Martins VS, Simionatto S, Motta-Castro AR,  
Pompílio MA, Urrego  
J, Ko AI, Andrews JR, Croda J. Impact of mass-screening on  
tuberculosis incidence  
in a prospective cohort of Brazilian prisoners. BMC Infect Dis. 2016  
Oct  
3;16(1):533. PubMed PMID: 27716170; PubMed Central PMCID:  
PMC5048439.

209: Sara C, Elsa H, Baijayanti M, Lennartsdotter EM. Clinical Correlates and Drug Resistance in HIV-Infected and -Uninfected Pulmonary Tuberculosis Patients in South India. World J AIDS. 2016 Sep;6(3):87-100. Epub 2016 Sep 9. PubMed PMID: 27708985; PubMed Central PMCID: PMC5047007.

210: Yadav S, Rawal G, Baxi M. Bedaquiline: A Novel Antitubercular Agent for the Treatment of Multidrug-Resistant Tuberculosis. J Clin Diagn Res. 2016 Aug;10(8):FM01-2. doi: 10.7860/JCDR/2016/19052.8286. Epub 2016 Aug 1. PubMed PMID: 27656462; PubMed Central PMCID: PMC5028565.

211: Narendran G, Kavitha D, Karunaianantham R, Gil-Santana L, Almeida-Junior JL, Reddy SD, Kumar MM, Hemalatha H, Jayanthi NN, Ravichandran N, Krishnaraja R, Prabhakar A, Manoharan T, Nithyananthan L, Arjunan G, Natrajan M, Swaminathan S, Andrade BB. Role of LTA4H Polymorphism in Tuberculosis-Associated Immune Reconstitution Inflammatory Syndrome Occurrence and Clinical Severity in Patients Infected with HIV. PLoS One. 2016 Sep 19;11(9):e0163298. doi: 10.1371/journal.pone.0163298. eCollection 2016. PubMed PMID: 27643598; PubMed Central PMCID: PMC5028072.

212: Siddiqui AN, Khayyam KU, Sharma M. Effect of Diabetes Mellitus on Tuberculosis Treatment Outcome and Adverse Reactions in Patients Receiving Directly Observed Treatment Strategy in India: A Prospective Study. Biomed Res Int. 2016;2016:7273935. doi: 10.1155/2016/7273935. Epub 2016 Aug 24. PubMed PMID: 27642601; PubMed Central PMCID: PMC5013229.

213: Rathee D, Arora P, Meena M, Sarin R, Chakraborty P, Jaiswal A, Goyal M. Comparative study of clinico-bacterio-radiological profile and treatment outcome of smokers and nonsmokers suffering from pulmonary tuberculosis. Lung India. 2016 Sep-Oct;33(5):507-11. doi: 10.4103/0970-2113.188970. PubMed PMID: 27625444; PubMed Central PMCID: PMC5006330.

214: Feng M, Ding Q, Zhong C, Li J, Wang Q, Yuan Z, Dong Y. Adjunctive therapy with V-5 Immunitor (V5) for the treatment of tuberculosis patients: a meta-analysis. *Pharmazie*. 2016 Sep 1;71(9):499-503. doi: 10.1691/ph.2016.6051. Review. PubMed PMID: 29441844.

215: Yoon YS, Jung JW, Jeon EJ, Seo H, Ryu YJ, Yim JJ, Kim YH, Lee BH, Park YB, Lee BJ, Kang H, Choi JC. The effect of diabetes control status on treatment response in pulmonary tuberculosis: a prospective study. *Thorax*. 2017 Mar;72(3):263-270. doi: 10.1136/thoraxjnl-2015-207686. Epub 2016 Aug 23. PubMed PMID: 27553224.

216: Nguyen QD, Merrill PT, Jaffe GJ, Dick AD, Kurup SK, Sheppard J, Schlaen A, Pavesio C, Cimino L, Van Calster J, Camez AA, Kwatra NV, Song AP, Kron M, Tari S, BrÃ©zin AP. Adalimumab for prevention of uveitic flare in patients with inactive non-infectious uveitis controlled by corticosteroids (VISUAL II): a multicentre, double-masked, randomised, placebo-controlled phase 3 trial. *Lancet*. 2016 Sep 17;388(10050):1183-92. doi: 10.1016/S0140-6736(16)31339-3. Epub 2016 Aug 16. Erratum in: *Lancet*. 2016 Sep 17;388(10050):1160. PubMed PMID: 27542302.

217: Shenai S, Ronacher K, Malherbe S, Stanley K, Kriel M, Winter J, Peppard T, Barry CE, Wang J, Dodd LE, Via LE, Barry CE 3rd, Walzl G, Alland D. Bacterial Loads Measured by the Xpert MTB/RIF Assay as Markers of Culture Conversion and Bacteriological Cure in Pulmonary TB. *PLoS One*. 2016 Aug 10;11(8):e0160062. doi: 10.1371/journal.pone.0160062. eCollection 2016. PubMed PMID: 27508390; PubMed Central PMCID: PMC4980126.

218: Namkoong H, Morimoto K, Nishimura T, Tanaka H, Sugiura H, Yamada Y, Kurosaki A, Asakura T, Suzuki S, Fujiwara H, Yagi K, Ishii M, Tasaka S, Betsuyaku T,

Hoshino Y, Kurashima A, Hasegawa N. Clinical efficacy and safety of multidrug therapy including thrice weekly intravenous amikacin administration for Mycobacterium abscessus pulmonary disease in outpatient settings: a case series. BMC Infect Dis. 2016 Aug 9;16:396. doi: 10.1186/s12879-016-1689-6. PubMed PMID: 27506679; PubMed Central PMCID: PMC4977760.

219: Micheletti VC, Kritski AL, Braga JU. Clinical Features and Treatment Outcomes of Patients with Drug-Resistant and Drug-Sensitive Tuberculosis: A Historical Cohort Study in Porto Alegre, Brazil. PLoS One. 2016 Aug 9;11(8):e0160109. doi: 10.1371/journal.pone.0160109. eCollection 2016. PubMed PMID: 27505633; PubMed Central PMCID: PMC4978410.

220: Cai L, Gu J, Zheng J, Zheng M, Wang G, Xi LY, Hao F, Liu XM, Sun QN, Wang Y, Lai W, Fang H, Tu YT, Sun Q, Chen J, Gao XH, Gu Y, Teixeira HD, Zhang JZ, Okun MM. Efficacy and safety of adalimumab in Chinese patients with moderate-to-severe plaque psoriasis: results from a phase 3, randomized, placebo-controlled, double-blind study. J Eur Acad Dermatol Venereol. 2017 Jan;31(1):89-95. doi: 10.1111/jdv.13746. Epub 2016 Aug 9. PubMed PMID: 27504914; PubMed Central PMCID: PMC5215651.

221: Mesquita ED, Gil-Santana L, Ramalho D, Tonomura E, Silva EC, Oliveira MM, Andrade BB, Kritski A; Rede-TB Study group. Associations between systemic inflammation, mycobacterial loads in sputum and radiological improvement after treatment initiation in pulmonary TB patients from Brazil: a prospective cohort study. BMC Infect Dis. 2016 Aug 5;16:368. doi: 10.1186/s12879-016-1736-3. PubMed PMID: 27494953; PubMed Central PMCID: PMC4974760.

222: Honarvar MR, Eghtesadi S, Gill P, Jazayeri S, Vakili MA, Shamsardekani MR, Abbasi A. The effect of green tea extract supplementation on sputum smear conversion and weight changes in pulmonary TB patients: A randomized controlled

trial. Med J Islam Repub Iran. 2016 Jun 1;30:381. eCollection 2016.  
PubMed PMID:  
27493925; PubMed Central PMCID: PMC4972068.

223: Vogelmeier C, Paggiaro PL, Dorca J, Sliwinski P, Mallet M, Kirsten AM, Beier J, Seoane B, Segarra RM, Leselbaum A. Efficacy and safety of acclidinium/formoterol versus salmeterol/fluticasone: a phase 3 COPD study. Eur Respir J. 2016 Oct;48(4):1030-1039. doi: 10.1183/13993003.00216-2016. Epub 2016 Aug 4. PubMed PMID: 27492833.

224: Mlotshwa M, Abraham N, Beery M, Williams S, Smit S, Uys M, Reddy C, Medina-Marino A. Risk factors for tuberculosis smear non-conversion in Eden district, Western Cape, South Africa, 2007-2013: a retrospective cohort study. BMC Infect Dis. 2016 Aug 2;16:365. doi: 10.1186/s12879-016-1712-y. PubMed PMID: 27484399; PubMed Central PMCID: PMC4971671.

225: Arbex MA, Bonini EH, Kawakame Pirolla G, D'Ambrosio L, Centis R, Migliori GB. Effectiveness and safety of imipenem/clavulanate and linezolid to treat multidrug and extensively drug-resistant tuberculosis at a referral hospital in Brazil. Rev Port Pneumol (2006). 2016 Nov - Dec;22(6):337-341. doi: 10.1016/j.rppnen.2016.06.006. Epub 2016 Jul 29. PubMed PMID: 27481315.

226: Shadmehr MB, Abbasidezfouli A, Farzanegan R, Pejhan S, Daneshvar Kakhaki A, Sheikhy K, Saghebi SR, Sadeghbeigee F, Gharedaghi A, Jahanshahi N, Zangi M. The Role of Systemic Steroids in Postintubation Tracheal Stenosis: A Randomized Clinical Trial. Ann Thorac Surg. 2017 Jan;103(1):246-253. doi: 10.1016/j.athoracsur.2016.05.063. Epub 2016 Jul 29. PubMed PMID: 27476818.

227: Modongo C, Pasipanodya JG, Magazi BT, Srivastava S, Zetola NM, Williams SM, Sirugo G, Gumbo T. Artificial Intelligence and Amikacin Exposures Predictive of Outcomes in Multidrug-Resistant Tuberculosis Patients. Antimicrob Agents Chemother. 2016 Sep 23;60(10):5928-32. doi: 10.1128/AAC.00962-16. Print 2016 Oct.

PubMed PMID: 27458224; PubMed Central PMCID: PMC5038293.

228: Lee HW, Lee JK, Kim E, Yim JJ, Lee CH. The Effectiveness and Safety of Fluoroquinolone-Containing Regimen as a First-Line Treatment for Drug-Sensitive Pulmonary Tuberculosis: A Systematic Review and Meta-Analysis. PLoS One. 2016 Jul 25;11(7):e0159827. doi: 10.1371/journal.pone.0159827. eCollection 2016. Review. PubMed PMID: 27455053; PubMed Central PMCID: PMC4959712.

229: Bunkar ML, Agnihotri SP, Gupta PR, Arya S. Add-on prednisolone in the management of cervical lymph node tuberculosis. Indian J Tuberc. 2016 Apr;63(2):96-9. doi: 10.1016/j.ijtb.2015.05.002. Epub 2016 Jun 4. PubMed PMID: 27451818.

230: Salindri AD, Kipiani M, Kempker RR, Gandhi NR, Darchia L, Tukvadze N, Blumberg HM, Magee MJ. Diabetes Reduces the Rate of Sputum Culture Conversion in Patients With Newly Diagnosed Multidrug-Resistant Tuberculosis. Open Forum Infect Dis. 2016 Jun 16;3(3):ofw126. doi: 10.1093/ofid/ofw126. eCollection 2016 Sep. PubMed PMID: 27419188; PubMed Central PMCID: PMC4942763.

231: Gualano G, Capone S, Matteelli A, Palmieri F. New Antituberculosis Drugs: From Clinical Trial to Programmatic Use. Infect Dis Rep. 2016 Jun 24;8(2):6569. doi: 10.4081/idr.2016.6569. eCollection 2016 Jun 24. Review. PubMed PMID: 27403268; PubMed Central PMCID: PMC4927937.

232: Radovic M, Ristic L, Ciric Z, Dinic-Radovic V, Stankovic I, Pejcic T, Rancic M, Bogdanovic D. Changes in respiratory function impairment following the treatment of severe pulmonary tuberculosis - limitations for the underlying COPD detection. Int J Chron Obstruct Pulmon Dis. 2016 Jun 16;11:1307-16. doi: 10.2147/COPD.S106875. eCollection 2016. PubMed PMID: 27366058; PubMed Central PMCID: PMC4914072.

233: Howard AA, Hirsch-Moverman Y, Frederix K, Daftary A, Saito S, Gross T, Wu Y, Maama LB. The START Study to evaluate the effectiveness of a combination intervention package to enhance antiretroviral therapy uptake and retention during TB treatment among TB/HIV patients in Lesotho: rationale and design of a mixed-methods, cluster-randomized trial. *Glob Health Action*. 2016 Jun 27;9:31543. doi: 10.3402/gha.v9.31543. eCollection 2016. PubMed PMID: 27357074; PubMed Central PMCID: PMC4926099.

234: Grobler L, Nagpal S, Sudarsanam TD, Sinclair D. Nutritional supplements for people being treated for active tuberculosis. *Cochrane Database Syst Rev*. 2016 Jun 29;(6):CD006086. doi: 10.1002/14651858.CD006086.pub4. Review. PubMed PMID: 27355911; PubMed Central PMCID: PMC4981643.

235: Aseffa A, Chukwu JN, Vahedi M, Aguwa EN, Bedru A, Mebrahtu T, Ezechi OC, Yimer G, Yamuah LK, Medhin G, Connolly C, Rida W, Aderaye G, Zumla AI, Onyebujoh PC; 4FDC Study Group. Efficacy and Safety of 'Fixed Dose' versus 'Loose' Drug Regimens for Treatment of Pulmonary Tuberculosis in Two High TB-Burden African Countries: A Randomized Controlled Trial. *PLoS One*. 2016 Jun 20;11(6):e0157434. doi: 10.1371/journal.pone.0157434. eCollection 2016. PubMed PMID: 27322164; PubMed Central PMCID: PMC4913909.

236: Xu L, Cui G, Jia H, Zhu Y, Ding Y, Chen J, Lu C, Ye P, Gao H, Li L, Ma W, Lyu J, Diao H. Decreased IL-17 during treatment of sputum smear-positive pulmonary tuberculosis due to increased regulatory T cells and IL-10. *J Transl Med*. 2016 Jun 16;14(1):179. doi: 10.1186/s12967-016-0909-6. PubMed PMID: 27311307; PubMed Central PMCID: PMC4911683.

237: Koethe JR, von Reyn CF. Protein-calorie malnutrition, macronutrient supplements, and tuberculosis. *Int J Tuberc Lung Dis*. 2016 Jul;20(7):857-63. doi: 10.5588/ijtld.15.0936. Review. PubMed PMID: 27287634.

238: Simonovska L, Ilievska-Popovska B. Comparison of Results from Inpatient and Outpatient Treatment of Tuberculosis in Republic of Macedonia. Open Access Maced J Med Sci. 2015 Jun 15;3(2):337-40. doi: 10.3889/oamjms.2015.050. Epub 2015 Apr 30. PubMed PMID: 27275247; PubMed Central PMCID: PMC4877879.

239: Bidaki R, Zarepur E, Akrami M, Mohammad M. Functional Neurological Symptom Disorder: Mismanagement, Misdiagnosis, Chronic Cough Following Sexual Abuse: A Rare Case Report. Iran J Child Neurol. 2016 Spring;10(2):90-2. PubMed PMID: 27247590; PubMed Central PMCID: PMC4885161.

240: MÃ©chaÃ F, Figoni J, Leblanc C, Gousseff M, Vignier N, Bouchaud O. Active pulmonary tuberculosis: Role for amikacin in early treatment. Med Mal Infect. 2016 Sep;46(6):318-21. doi: 10.1016/j.medmal.2016.04.010. Epub 2016 May 24. PubMed PMID: 27235009.

241: Hejazi ME, Modarresi-Ghazani F, Hamishehkar H, Mesgari-Abbasi M, Dousti S, Entezari-Maleki T. The Effect of Treatment of Vitamin D Deficiency on the Level of P-Selectin and hs-CRP in Patients With Thromboembolism: A Pilot Randomized Clinical Trial. J Clin Pharmacol. 2017 Jan;57(1):40-47. doi: 10.1002/jcph.774. Epub 2016 Jun 28. PubMed PMID: 27225617.

242: Tamura A. TUBERCULOSIS AND LUNG CANCER. Kekkaku. 2016 Jan;91(1):17-25. PubMed PMID: 27192776.

243: Gallardo CR, Rigau Comas D, Valderrama RodrÃguez A, RoquÃ© i Figuls M, Parker LA, CaylÃ J, Bonfill Cosp X. Fixed-dose combinations of drugs versus single-drug formulations for treating pulmonary tuberculosis. Cochrane Database Syst Rev. 2016 May 17;(5):CD009913. doi: 10.1002/14651858.CD009913.pub2. Review. PubMed PMID: 27186634; PubMed Central PMCID: PMC4916937.

244: Koh WJ, Jeong BH, Jeon K, Kim SY, Park KU, Park HY, Huh HJ, Ki CS, Lee NY, Lee SH, Kim CK, Daley CL, Shin SJ, Kim H, Kwon OJ. Oral Macrolide Therapy Following Short-term Combination Antibiotic Treatment of Mycobacterium massiliense Lung Disease. *Chest*. 2016 Dec;150(6):1211-1221. doi: 10.1016/j.chest.2016.05.003. Epub 2016 May 7. PubMed PMID: 27167209.

245: Conde MB, Mello FC, Duarte RS, Cavalcante SC, Rolla V, Dalcolmo M, Loredo C, Durovni B, Armstrong DT, Efron A, Barnes GL, Marzinke MA, Savic RM, Dooley KE, Cohn S, Moulton LH, Chaisson RE, Dorman SE. A Phase 2 Randomized Trial of a Rifapentine plus Moxifloxacin-Based Regimen for Treatment of Pulmonary Tuberculosis. *PLoS One*. 2016 May 9;11(5):e0154778. doi: 10.1371/journal.pone.0154778. eCollection 2016. PubMed PMID: 27159505; PubMed Central PMCID: PMC4861335.

246: Sgaragli G, Frosini M, Saponara S, Corelli F. Human Tuberculosis. III. Current and Prospective Approaches in Anti-Tubercular Therapy. *Curr Med Chem*. 2016;23(21):2245-74. Review. PubMed PMID: 27142291.

247: Kwon YS, Koh WJ. Diagnosis and Treatment of Nontuberculous Mycobacterial Lung Disease. *J Korean Med Sci*. 2016 May;31(5):649-59. doi: 10.3346/jkms.2016.31.5.649. Epub 2016 Mar 22. Review. PubMed PMID: 27134484; PubMed Central PMCID: PMC4835588.

248: Charan J, Reljic T, Kumar A. Bedaquiline versus placebo for management of multiple drug-resistant tuberculosis: A systematic review. *Indian J Pharmacol*. 2016 Mar-Apr;48(2):186-91. doi: 10.4103/0253-7613.178839. Review. PubMed PMID: 27127322; PubMed Central PMCID: PMC4825437.

249: Barogui YT, Klis SA, Johnson RC, Phillips RO, van der Veer E, van Diemen C, van der Werf TS, Stienstra Y. Genetic Susceptibility and Predictors of Paradoxical Reactions in Buruli Ulcer. *PLoS Negl Trop Dis*. 2016 Apr 20;10(4):e0004594. doi: 10.1371/journal.pntd.0004594. eCollection 2016 Apr. PubMed PMID: 27097163; PubMed Central PMCID: PMC4838240.

250: Kulkarni RA, Deshpande AR. Anti-inflammatory and antioxidant effect of ginger in tuberculosis. *J Complement Integr Med.* 2016 Jun 1;13(2):201-6. doi: 10.1515/jcim-2015-0032. PubMed PMID: 27089418.

251: Tiberi S, Sotgiu G, D'Ambrosio L, Centis R, Abdo Arbex M, Alarcon Arrascue E, Alffenaar JW, Caminero JA, Gaga M, Gualano G, Skrahina A, Solovic I, Sulis G, Tadolini M, Alarcon Guizado V, De Lorenzo S, Roby Arias AJ, Scardigli A, Akkerman OW, Aleksa A, Artsukevich J, Auchynka V, Bonini EH, Chong MarÃ¡n FA, Collahuazo LÃ¡pez L, de Vries G, Dore S, Kunst H, Matteelli A, Moschos C, Palmieri F, Papavasileiou A, Payen MC, Piana A, Spanevello A, Vargas Vasquez D, Viggiani P, White V, Zumla A, Migliori GB. Comparison of effectiveness and safety of imipenem/clavulanate- versus meropenem/clavulanate-containing regimens in the treatment of MDR-Ã andÃ XDR-TB. *Eur Respir J.* 2016 Jun;47(6):1758-66. doi: 10.1183/13993003.00214-2016. Epub 2016 Apr 13. PubMed PMID: 27076583.

252: Qin F, Barry PM, Pascopella L. Factors associated with extended treatment among tuberculosis patients at risk of relapse in California. *Int J Tuberc Lung Dis.* 2016 Mar;20(3):363-9. doi: 10.5588/ijtld.15.0469. PubMed PMID: 27046718.

253: Musselwhite LW, Andrade BB, Ellenberg SS, Tierney A, Belaunzaran-Zamudio PF, Rupert A, Lederman MM, Sanne I, Sierra Madero JG, Sereti I. Vitamin D, D-dimer, Interferon  $\hat{I}^3$ , and sCD14 Levels are Independently Associated with Immune Reconstitution Inflammatory Syndrome: A Prospective, International Study. *EBioMedicine.* 2016 Jan 14;4:115-23. doi: 10.1016/j.ebiom.2016.01.016. eCollection 2016 Feb. PubMed PMID: 26981576; PubMed Central PMCID: PMC4776072.

254: Swaminathan A, du Cros P, Seddon JA, Quinnell S, Bobokhojaev OI, Dusmatova Z, Achar J. Treating children for drug-resistant tuberculosis in Tajikistan with

Group 5 medications. *Int J Tuberc Lung Dis.* 2016 Apr;20(4):474-8.  
doi:  
10.5588/ijtld.15.0666. PubMed PMID: 26970156.

255: Tiberi S, Payen MC, Sotgiu G, D'Ambrosio L, Alarcon Guizado V, Alffenaar JW, Abdo Arbex M, Caminero JA, Centis R, De Lorenzo S, Gaga M, Gualano G, Roby Arias AJ, Scardigli A, Skrahina A, Solovic I, Sulis G, Tadolini M, Akkerman OW, Alarcon Arrascue E, Aleska A, Avchinko V, Bonini EH, Chong MarÃ-n FA, Collahuazo LÃ³pez L, de Vries G, Dore S, Kunst H, Matteelli A, Moschos C, Palmieri F, Papavasileiou A, Spanevello A, Vargas Vasquez D, Viggiani P, White V, Zumla A, Migliori GB. Effectiveness and safety of meropenem/clavulanate-containing regimens in the treatment of MDR- and XDR-TB. *Eur Respir J.* 2016 Apr;47(4):1235-43. doi: 10.1183/13993003.02146-2015. Epub 2016 Mar 10. PubMed PMID: 26965290.

256: Shariff NM, Safian N. Diabetes mellitus and its influence on sputum smear positivity at the 2nd month of treatment among pulmonary tuberculosis patients in Kuala Lumpur, Malaysia: A case control study. *Int J Mycobacteriol.* 2015 Dec;4(4):323-9. doi: 10.1016/j.ijmyco.2015.09.003. Epub 2015 Oct 1. PubMed PMID: 26964816.

257: Calverley PM, Postma DS, Anzueto AR, Make BJ, Eriksson G, Peterson S, Jenkins CR. Early response to inhaled bronchodilators and corticosteroids as a predictor of 12-month treatment responder status and COPD exacerbations. *Int J Chron Obstruct Pulmon Dis.* 2016 Feb 25;11:381-90. doi: 10.2147/COPD.S93303. eCollection 2016. PubMed PMID: 26952309; PubMed Central PMCID: PMC4772946.

258: Sun Q, Zhang Q, Gu J, Sun WW, Wang P, Bai C, Xiao HP, Sha W. Prevalence, risk factors, management, and treatment outcomes of first-line antituberculous drug-induced liver injury: a prospective cohort study. *Pharmacoepidemiol Drug Saf.* 2016 Aug;25(8):908-17. doi: 10.1002/pds.3988. Epub 2016 Mar 2. PubMed PMID:

26935778.

259: Mukerji S, Shahpuri B, Clayton-Smith B, Smith N, Armstrong P, Hardy M, Marchant G, Marsh E. Intravenous magnesium sulphate as an adjuvant therapy in acute exacerbations of chronic obstructive pulmonary disease: a single centre, randomised, double-blinded, parallel group, placebo-controlled trial: a pilot study. *N Z Med J*. 2015 Nov 20;128(1425):34-42. PubMed PMID: 26905985.

260: Ruan Q, Liu Q, Sun F, Shao L, Jin J, Yu S, Ai J, Zhang B, Zhang W. Moxifloxacin and gatifloxacin for initial therapy of tuberculosis: a meta-analysis of randomized clinical trials. *Emerg Microbes Infect*. 2016 Feb 24;5:e12. doi: 10.1038/emi.2016.12. PubMed PMID: 26905025; PubMed Central PMCID: PMC4777926.

261: Colombel JF, Sands BE, Rutgeerts P, Sandborn W, Danese S, D'Haens G, Panaccione R, Loftus EV Jr, Sankoh S, Fox I, Parikh A, Milch C, Abhyankar B, Feagan BG. The safety of vedolizumab for ulcerative colitis and Crohn's disease. *Gut*. 2017 May;66(5):839-851. doi: 10.1136/gutjnl-2015-311079. Epub 2016 Feb 18. PubMed PMID: 26893500; PubMed Central PMCID: PMC5531223.

262: Kang YA, Shim TS, Koh WJ, Lee SH, Lee CH, Choi JC, Lee JH, Jang SH, Yoo KH, Jung KH, Kim KU, Choi SB, Ryu YJ, Kim KC, Um S, Kwon YS, Kim YH, Choi WI, Jeon K, Hwang YI, Kim SJ, Lee HK, Heo E, Yim JJ. Choice between Levofloxacin and Moxifloxacin and Multidrug-Resistant Tuberculosis Treatment Outcomes. *Ann Am Thorac Soc*. 2016 Mar;13(3):364-70. doi: 10.1513/AnnalsATS.201510-690BC. PubMed PMID: 26871879.

263: Phillips PP, Mendel CM, Burger DA, Crook AM, Nunn AJ, Dawson R, Diacon AH, Gillespie SH. Limited role of culture conversion for decision-making in individual patient care and for advancing novel regimens to confirmatory clinical

trials. BMC Med. 2016 Feb 4;14:19. doi: 10.1186/s12916-016-0565-y.  
Erratum in:  
BMC Med. 2016;14:36. Crook, Angela [corrected to Crook, Angela M].  
PubMed PMID:  
26847437; PubMed Central PMCID: PMC4743210.

264: Okumura M, Sasaki Y, Yoshiyama T, Matsuda S, Osawa T, Morimoto K, Yanai H, Kurasima A, Ogata H, Gotoh H. [CLINICAL EFFECTS OF TREATMENT FOR MYCOBACTERIUM TUBERCULOSIS INFECTION IN PATIENTS AT A SPECIALIZED HOSPITAL IN 2011]. Kekkaku. 2015 Oct;90(10):665-70. Japanese. PubMed PMID: 26821395.

265: Kadota T, Matsui H, Hirose T, Suzuki J, Saito M, Akaba T, Kobayashi K, Akashi S, Kawashima M, Tamura A, Nagai H, Akagawa S, Kobayashi N, Ohta K. Analysis of drug treatment outcome in clarithromycin-resistant Mycobacterium avium complex lung disease. BMC Infect Dis. 2016 Jan 27;16:31. doi: 10.1186/s12879-016-1384-7. PubMed PMID: 26818764; PubMed Central PMCID: PMC4730784.

266: Chen KY, Chuang KJ, Liu HC, Lee KY, Feng PH, Su CL, Lin CL, Lee CN, Chuang HC. Particulate matter is associated with sputum culture conversion in patients with culture-positive tuberculosis. Ther Clin Risk Manag. 2016 Jan 6;12:41-6. doi: 10.2147/TCRM.S92927. eCollection 2016. PubMed PMID: 26792994; PubMed Central PMCID: PMC4708199.

267: Biraro IA, Kimuda S, Egesa M, Cose S, Webb EL, Joloba M, Smith SG, Elliott AM, Dockrell HM, Katamba A. The Use of Interferon Gamma Inducible Protein 10 as a Potential Biomarker in the Diagnosis of Latent Tuberculosis Infection in Uganda. PLoS One. 2016 Jan 15;11(1):e0146098. doi: 10.1371/journal.pone.0146098. eCollection 2016. PubMed PMID: 26771653; PubMed Central PMCID: PMC4714877.

268: Pastells C, Pascual N, Sanchez-Baeza F, Marco MP. Immunochemical Determination of Pyocyanin and 1-Hydroxyphenazine as Potential Biomarkers of

Pseudomonas aeruginosa Infections. Anal Chem. 2016 Feb 2;88(3):1631-8. doi: 10.1021/acs.analchem.5b03490. Epub 2016 Jan 20. PubMed PMID: 26738983.

269: Carriñán-Torres O, Cazorla-Saravia P, Torres Sales JW, Yhuri Carreazo N, De La Cruz Armijo FE. [Characteristics of the diagnosis and treatment of pulmonary tuberculosis in patients with and without diabetes mellitus type 2]. Rev Peru Med Exp Salud Publica. 2015 Oct;32(4):680-6. Spanish. PubMed PMID: 26732915.

270: Azarkar Z, Sharifzadeh G, Ebrahimzadeh A, Olumi S. Time to Sputum Smear Conversion in Smear-Positive Pulmonary Tuberculosis Patients and Factors for Delayed Conversion. Iran J Med Sci. 2016 Jan;41(1):44-7. PubMed PMID: 26722144; PubMed Central PMCID: PMC4691269.

271: Yuen CM, Kurbatova EV, Tupasi T, Caoili JC, Van Der Walt M, Kvasnovsky C, Yagui M, Bayona J, Contreras C, Leimane V, Ershova J, Via LE, Kim H, Akksilp S, Kazenny BY, Volchenkov GV, Jou R, Kliiman K, Demikhova OV, Vasilyeva IA, Dalton T, Cegielski JP. Association between Regimen Composition and Treatment Response in Patients with Multidrug-Resistant Tuberculosis: A Prospective Cohort Study. PLoS Med. 2015 Dec 29;12(12):e1001932. doi: 10.1371/journal.pmed.1001932. eCollection 2015 Dec. PubMed PMID: 26714320; PubMed Central PMCID: PMC4700973.

272: Karoli R, Fatima J, Gupta SS, Shukla V, Moidurrehman, Manhar M. Vitamin D Deficiency in Medical Patients at a Teaching Hospital in North India. J Assoc Physicians India. 2015 Jun;63(6):35-9. PubMed PMID: 26710398.

273: Gadallah MA, Mokhtar A, Rady M, El-Moghazy E, Fawzy M, Kandil SK. Prognostic factors of treatment among patients with multidrug-resistant tuberculosis in Egypt. J Formos Med Assoc. 2016 Nov;115(11):997-1003. doi: 10.1016/j.jfma.2015.10.002. Epub 2015 Dec 13. PubMed PMID: 26696497.

274: Kim J, Kwak N, Lee HY, Kim TS, Kim CK, Han SK, Yim JJ. Effect of drug resistance on negative conversion of sputum culture in patients with pulmonary tuberculosis. *Int J Infect Dis.* 2016 Jan;42:64-68. doi: 10.1016/j.ijid.2015.11.018. Epub 2015 Dec 10. PubMed PMID: 26692454.

275: Li D, Wang T, Shen S, Cheng S, Yu J, Zhang Y, Zhang C, Tang H. Effects of Fluroquinolones in Newly Diagnosed, Sputum-Positive Tuberculosis Therapy: A Systematic Review and Network Meta-Analysis. *PLoS One.* 2015 Dec 15;10(12):e0145066. doi: 10.1371/journal.pone.0145066. eCollection 2015. Review. PubMed PMID: 26669635; PubMed Central PMCID: PMC4682926.

276: Rieu R, Chang C, Collin SM, Fazekas J, Dassanaik S, Abbara A, Davidson RN. Time to detection in liquid culture of sputum in pulmonary MDR-TB does not predict culture conversion for early discharge. *J Antimicrob Chemother.* 2016 Mar;71(3):803-6. doi: 10.1093/jac/dkv407. Epub 2015 Dec 11. PubMed PMID: 26661394.

277: Masuda M, Sato T, Sakamaki K, Kudo M, Kaneko T, Ishigatsubo Y. The effectiveness of sputum pH analysis in the prediction of response to therapy in patients with pulmonary tuberculosis. *PeerJ.* 2015 Nov 26;3:e1448. doi: 10.7717/peerj.1448. eCollection 2015. PubMed PMID: 26644982; PubMed Central PMCID: PMC4671190.

278: Si ZL, Kang LL, Shen XB, Zhou YZ. Adjuvant Efficacy of Nutrition Support During Pulmonary Tuberculosis Treating Course: Systematic Review and Meta-analysis. *Chin Med J (Engl).* 2015 Dec 5;128(23):3219-30. doi: 10.4103/0366-6999.170255. Review. PubMed PMID: 26612299; PubMed Central PMCID: PMC4794866.

279: Zhu Y, Jia H, Chen J, Cui G, Gao H, Wei Y, Lu C, Wang L, Uede T, Diao H. Decreased Osteopontin Expression as a Reliable Prognostic Indicator of Improvement in Pulmonary Tuberculosis: Impact of the Level of Interferon-gamma-Inducible Protein 10. *Cell Physiol Biochem.* 2015;37(5):1983-96.

doi: 10.1159/000438559. Epub 2015 Nov 20. PubMed PMID: 26584297.

280: Kanda R, Nagao T, Tho NV, Ogawa E, Murakami Y, Osawa M, Saika Y, Doi K, Nakano Y. Factors Affecting Time to Sputum Culture Conversion in Adults with Pulmonary Tuberculosis: A Historical Cohort Study without Censored Cases. PLoS One. 2015 Nov 11;10(11):e0142607. doi: 10.1371/journal.pone.0142607. eCollection 2015. PubMed PMID: 26558764; PubMed Central PMCID: PMC4641703.

281: Miyazaki Y, Azuma A, Inase N, Taniguchi H, Ogura T, Inoue E, Takeuchi M, Yoshizawa Y, Sugiyama Y, Kudoh S; IPF trial group in Japan. Cyclosporine A combined with low-dose corticosteroid treatment in patients with idiopathic pulmonary fibrosis. Respir Investig. 2015 Nov;53(6):288-95. doi: 10.1016/j.resinv.2015.05.002. Epub 2015 Jul 14. PubMed PMID: 26521106.

282: Min J, Park J, Lee YJ, Kim SJ, Park JS, Cho YJ, Yoon HI, Lee CT, Lee JH. Determinants of recurrence after successful treatment of Mycobacterium avium complex lung disease. Int J Tuberc Lung Dis. 2015 Oct;19(10):1239-45. doi: 10.5588/ijtld.14.0139. PubMed PMID: 26459540.

283: Kim YW, Seong MW, Kim TS, Yoo CG, Kim YW, Han SK, Yim JJ. Evaluation of Xpert(®) MTB/RIF assay: diagnosis and treatment outcomes in rifampicin-resistant tuberculosis. Int J Tuberc Lung Dis. 2015 Oct;19(10):1216-21. doi: 10.5588/ijtld.15.0183. PubMed PMID: 26459536.

284: Wallis RS, Peppard T. Early Biomarkers and Regulatory Innovation in Multidrug-Resistant Tuberculosis. Clin Infect Dis. 2015 Oct 15;61Suppl 3:S160-3. doi: 10.1093/cid/civ612. PubMed PMID: 26409278.

285: Mahadeo R, Gounder S, Graham SM. Changing from single-drug to fixed-dose combinations: experience from Fiji. Public Health Action. 2014 Sep 21;4(3):169-73. doi: 10.5588/pha.14.0024. PubMed PMID: 26400805; PubMed Central PMCID: PMC4533822.

286: Prasad P, Gounder S, Varman S, Viney K. Sputum smear conversion and treatment outcomes for tuberculosis patients with and without diabetes in Fiji. *Public Health Action*. 2014 Sep 21;4(3):159-63. doi: 10.5588/pha.14.0023. PubMed PMID: 26400803; PubMed Central PMCID: PMC4533811.

287: Tukvadze N, Sanikidze E, Kipiani M, Hebbar G, Easley KA, Shenvi N, Kempker RR, Frediani JK, Mirtskhulava V, Alvarez JA, Lomtadze N, Vashakidze L, Hao L, Del Rio C, Tangpricha V, Blumberg HM, Ziegler TR. High-dose vitamin D3 in adults with pulmonary tuberculosis: a double-blind randomized controlled trial. *Am J Clin Nutr*. 2015 Nov;102(5):1059-69. doi: 10.3945/ajcn.115.113886. Epub 2015 Sep 23. PubMed PMID: 26399865; PubMed Central PMCID: PMC4625591.

288: Jones-López EC, White LF, Kirenga B, Mumbowa F, Ssebidandi M, Moine S, Mbabazi O, Mboowa G, Ayakaka I, Kim S, Thornton CS, Okwera A, Joloba M, Fennelly KP. Cough Aerosol Cultures of Mycobacterium tuberculosis: Insights on TST / IGRA Discordance and Transmission Dynamics. *PLoS One*. 2015 Sep 22;10(9):e0138358. doi: 10.1371/journal.pone.0138358. eCollection 2015. PubMed PMID: 26394149; PubMed Central PMCID: PMC4578948.

289: Mily A, Rekha RS, Kamal SM, Arifuzzaman AS, Rahim Z, Khan L, Haq MA, Zaman K, Bergman P, Brighenti S, Gudmundsson GH, Agerberth B, Raqib R. Significant Effects of Oral Phenylbutyrate and Vitamin D3 Adjunctive Therapy in Pulmonary Tuberculosis: A Randomized Controlled Trial. *PLoS One*. 2015 Sep 22;10(9):e0138340. doi: 10.1371/journal.pone.0138340. eCollection 2015. PubMed PMID: 26394045; PubMed Central PMCID: PMC4578887.

290: Sawadogo B, Tint KS, Tshimanga M, Kuonza L, Ouedraogo L. Risk factors for tuberculosis treatment failure among pulmonary tuberculosis patients in four health regions of Burkina Faso, 2009: case control study. *Pan Afr Med J*. 2015 Jun 24;21:152. doi: 10.11604/pamj.2015.21.152.4827. eCollection 2015. PubMed PMID:

26327989; PubMed Central PMCID: PMC4546781.

291: Mahishale V, Patil B, Lolly M, Eti A, Khan S. Prevalence of Smoking and Its Impact on Treatment Outcomes in Newly Diagnosed Pulmonary Tuberculosis Patients: A Hospital-Based Prospective Study. Chonnam Med J. 2015 Aug;51(2):86-90. doi: 10.4068/cmj.2015.51.2.86. Epub 2015 Aug 17. PubMed PMID: 26306303; PubMed Central PMCID: PMC4543154.

292: Shi G, Zhang L. Effects on type 2 diabetes complicated with pulmonary tuberculosis: regiment of insulin, isoniazid, rifampicin, pyrazinamide and ethambutol versus the regiment plus Qi-boosting and Yin-nourishing decoction of Traditional Chinese Medicine. J Tradit Chin Med. 2015 Jun;35(3):260-5. PubMed PMID: 26237828.

293: Nebenzahl-Guimaraes H, Verhagen LM, Borgdorff MW, van Soolingen D. Transmission and Progression to Disease of Mycobacterium tuberculosis Phylogenetic Lineages in The Netherlands. J Clin Microbiol. 2015 Oct;53(10):3264-71. doi: 10.1128/JCM.01370-15. Epub 2015 Jul 29. PubMed PMID: 26224845; PubMed Central PMCID: PMC4572527.

294: Junaid K, Rehman A, Saeed T, Jolliffe DA, Wood K, Martineau AR. Genotype-independent association between profound vitamin D deficiency and delayed sputum smear conversion in pulmonary tuberculosis. BMC Infect Dis. 2015 Jul 21;15:275. doi: 10.1186/s12879-015-1018-5. PubMed PMID: 26193879; PubMed Central PMCID: PMC4508807.

295: Lin ZW, Gu J, Xu ST, Ge D, Wang Q. Video-Assisted Thoracoscopic Surgery for Intralobar Pulmonary Sequestration: Wedge Resection Is Feasible in Limited Peripheral Lesions. Thorac Cardiovasc Surg. 2016 Aug;64(5):456-60. doi: 10.1055/s-0035-1556820. Epub 2015 Jul 15. PubMed PMID: 26177227.

296: Shen H, Min R, Tan Q, Xie W, Wang H, Pan H, Zhang L, Xu H, Zhang X, Dai J.

The beneficial effects of adjunctive recombinant human interleukin-2 for multidrug resistant tuberculosis. Arch Med Sci. 2015 Jun 19;11(3):584-90. doi: 10.5114/aoms.2015.52362. PubMed PMID: 26170852; PubMed Central PMCID: PMC4495154.

297: Jung M, Uhl B, Kristiansen G, Dietrich D. Bisulfite Conversion of DNA from Tissues, Cell Lines, Buffy Coat, FFPE Tissues, Microdissected Cells, Swabs, Sputum, Aspirates, Lavages, Effusions, Plasma, Serum, and Urine. Methods Mol Biol. 2017;1589:139-159. doi: 10.1007/7651\_2015\_260. PubMed PMID: 26138988.

298: Field SK. Bedaquiline for the treatment of multidrug-resistant tuberculosis: great promise or disappointment? Ther Adv Chronic Dis. 2015 Jul;6(4):170-84. doi: 10.1177/2040622315582325. Review. PubMed PMID: 26137207; PubMed Central PMCID: PMC4480545.

299: Feng G, Wang D, Chen LI, Xie G, Zhang YU, Wang J, DU XB. Malignant conversion of a solitary squamous cell papilloma in the trachea treated by radiotherapy: A case report. Oncol Lett. 2015 May;9(5):2013-2016. Epub 2015 Mar 20. PubMed PMID: 26137004; PubMed Central PMCID: PMC4467276.

300: Ernawati, Gumilar E, Kuntoro, Soeroso J, Dekker G. Expectant management of preterm preeclampsia in Indonesia and the role of steroids. J Matern Fetal Neonatal Med. 2016;29(11):1736-40. doi: 10.3109/14767058.2015.1059815. Epub 2015 Jul 27. PubMed PMID: 26135754.

301: Rohini K, Bhat S, Srikumar PS, Mahesh Kumar A. Serum PCT and its Relation to Body Weight Gain in Pulmonary Tuberculosis. Indian J Clin Biochem. 2015 Jul;30(3):329-33. doi: 10.1007/s12291-014-0432-6. Epub 2014 Apr 18. PubMed PMID: 26089621; PubMed Central PMCID: PMC4469052.

302: Lee SH, Seo KA, Lee YM, Lee HK, Kim JH, Shin C, Ghim JR, Shin JG, Kim DH.

Low Serum Concentrations of Moxifloxacin, Prothionamide, and Cycloserine on Sputum Conversion in Multi-Drug Resistant TB. *Yonsei Med J.* 2015 Jul;56(4):961-7. doi: 10.3349/ymj.2015.56.4.961. PubMed PMID: 26069117; PubMed Central PMCID: PMC4479863.

303: Griffith DE, Adjemian J, Brown-Elliott BA, Philley JV, Prevots DR, Gaston C, Olivier KN, Wallace RJ Jr. Semiquantitative Culture Analysis during Therapy for *Mycobacterium avium* Complex Lung Disease. *Am J Respir Crit Care Med.* 2015 Sep 15;192(6):754-60. doi: 10.1164/rccm.201503-0444OC. PubMed PMID: 26068042; PubMed Central PMCID: PMC4595680.

304: Wallis RS. Sputum culture conversion in new TB regimens. *Lancet Respir Med.* 2015 Jun;3(6):e18-9. doi: 10.1016/S2213-2600(15)00182-4. PubMed PMID: 26065975.

305: Dawson R, Narunsky K, Carman D, Gupte N, Whitelaw A, Efron A, Barnes GL, Hoffman J, Chaisson RE, McIlleron H, Dorman SE. Two-stage activity-safety study of daily rifapentine during intensive phase treatment of pulmonary tuberculosis. *Int J Tuberc Lung Dis.* 2015 Jul;19(7):780-6. doi: 10.5588/ijtld.14.0868. PubMed PMID: 26056101.

306: Mzinza DT, Sloan DJ, Jambo KC, Shani D, Kamdolozi M, Wilkinson KA, Wilkinson RJ, Davies GR, Heyderman RS, Mwandumba HC. Kinetics of *Mycobacterium tuberculosis*-specific IFN- $\gamma$  responses and sputum bacillary clearance in HIV-infected adults during treatment of pulmonary tuberculosis. *Tuberculosis (Edinb).* 2015 Jul;95(4):463-9. doi: 10.1016/j.tube.2015.05.009. Epub 2015 May 28. PubMed PMID: 26051653; PubMed Central PMCID: PMC4503815.

307: Palmero D, González Montaner P, Cufre M, García A, Vescovo M, Poggi S. First series of patients with XDR and pre-XDR TB treated with regimens that included meropenem-clavulanate in Argentina. *Arch Bronconeumol.* 2015 Oct;51(10):e49-52.

doi: 10.1016/j.arbres.2015.03.012. Epub 2015 May 27. English, Spanish. PubMed  
PMID: 26026689.

308: Ram rez-Lapausa M, Pascual Pareja JF, Carrillo G mez R, Mart nez-Prieto M, Gonz lez-Ruano P rez P, Noguerado Asensio A. Retrospective study of tolerability and efficacy of linezolid in patients with multidrug-resistant tuberculosis (1998-2014). *Enferm Infecc Microbiol Clin*. 2016 Feb;34(2):85-90. doi: 10.1016/j.eimc.2015.04.003. Epub 2015 May 23. PubMed PMID: 26015067.

309: Mthiyane T, Rustomjee R, Pym A, Connolly C, Onyebujoh P, Theron G, Dheda K. Impact of tuberculosis treatment and antiretroviral therapy on serial RD-1-specific quantitative T-cell readouts (QuantiFERON-TB Gold In-Tube), and relationship to treatment-related outcomes and bacterial burden. *Int J Infect Dis*. 2015 Jul;36:46-53. doi: 10.1016/j.ijid.2015.05.006. Epub 2015 May 21. PubMed PMID: 26003404.

310: Mohr E, Cox V, Wilkinson L, Moyo S, Hughes J, Daniels J, Muller O, Cox H. Programmatic treatment outcomes in HIV-infected and uninfected drug-resistant TB patients in Khayelitsha, South Africa. *Trans R Soc Trop Med Hyg*. 2015 Jul;109(7):425-32. doi: 10.1093/trstmh/trv037. Epub 2015 May 15. PubMed PMID: 25979526.

311: Amogne W, Aderaye G, Habtewold A, Yimer G, Makonnen E, Worku A, Sonnerborg A, Aklillu E, Lindquist L. Efficacy and Safety of Antiretroviral Therapy Initiated One Week after Tuberculosis Therapy in Patients with CD4 Counts < 200 Cells/ L: TB-HAART Study, a Randomized Clinical Trial. *PLoS One*. 2015 May 12;10(5):e0122587. doi: 10.1371/journal.pone.0122587. eCollection 2015. PubMed PMID: 25966339; PubMed Central PMCID: PMC4429073.

312: Dobler CC, Korver S, Batbayar O, Oyuntsetseg S, Tsolmon B, Wright C, Solongo

B, Marais BJ. Success of community-based directly observed anti-tuberculosis treatment in Mongolia. *Int J Tuberc Lung Dis*. 2015 Jun;19(6):657-62. doi: 10.5588/ijtld.14.0927. PubMed PMID: 25946355.

313: Pietersen E, Peter J, Streicher E, Sirgel F, Rockwood N, Mastrapa B, Te Riele J, Davids M, van Helden P, Warren R, Dheda K. High frequency of resistance, lack of clinical benefit, and poor outcomes in capreomycin treated South African patients with extensively drug-resistant tuberculosis. *PLoS One*. 2015 Apr 24;10(4):e0123655. doi: 10.1371/journal.pone.0123655. eCollection 2015. PubMed PMID: 25909847; PubMed Central PMCID: PMC4409172.

314: Liang S, Zhang J, Hu L, Chen J, Wu J, Huang Y, Zeng Y, Zhu Y, Li Z, Wen Y, Liang W, Zhuo J, He H. USA's expanded overseas tuberculosis screening program: a retrospective study in China. *BMC Public Health*. 2015 Mar 7;15:231. doi: 10.1186/s12889-015-1558-z. PubMed PMID: 25886508; PubMed Central PMCID: PMC4364631.

315: Djouma FN, Noubom M, Ateudjieu J, Donfack H. Delay in sputum smear conversion and outcomes of smear-positive tuberculosis patients: a retrospective cohort study in Bafoussam, Cameroon. *BMC Infect Dis*. 2015 Mar 21;15:139. doi: 10.1186/s12879-015-0876-1. PubMed PMID: 25884844; PubMed Central PMCID: PMC4381415.

316: Cates J, Trieu L, Proops D, Ahuja SD. Contact Investigations Around *Mycobacterium tuberculosis* Patients Without Positive Respiratory Culture. *J Public Health Manag Pract*. 2016 May-Jun;22(3):275-82. doi: 10.1097/PHH.0000000000000261. PubMed PMID: 25867495.

317: Daley P, Jagannathan V, John KR, Sarojini J, Latha A, Vieth R, Suzana S, Jeyaseelan L, Christopher DJ, Smieja M, Mathai D. Adjunctive vitamin D for treatment of active tuberculosis in India: a randomised, double-blind,

placebo-controlled trial. *Lancet Infect Dis*. 2015 May;15(5):528-34.  
doi:  
10.1016/S1473-3099(15)70053-8. Epub 2015 Apr 8. PubMed PMID:  
25863562.

318: Wang M, Guan X, Chi Y, Robinson N, Liu JP. Chinese herbal medicine as adjuvant treatment to chemotherapy for multidrug-resistant tuberculosis (MDR-TB): A systematic review of randomised clinical trials. *Tuberculosis (Edinb)*. 2015 Jul;95(4):364-72. doi: 10.1016/j.tube.2015.03.003. Epub 2015 Mar 18. Review. PubMed PMID: 25861717.

319: Kibleur Y, Veziris N. French Nationwide Cohort Temporary Utilization Authorization Survey of GranuPAS (Â®) in MDR-TB patients. *Chemotherapy*. 2014;60(3):174-9. doi: 10.1159/000371869. Epub 2015 Mar 23. PubMed PMID: 25823752.

320: Adekambi T, Ibegbu CC, Cagle S, Kalokhe AS, Wang YF, Hu Y, Day CL, Ray SM, Rengarajan J. Biomarkers on patient T cells diagnose active tuberculosis and monitor treatment response. *J Clin Invest*. 2015 May;125(5):1827-38. doi: 10.1172/JCI77990. Epub 2015 Mar 30. Erratum in: *J Clin Invest*. 2015 Sep;125(9):3723. PubMed PMID: 25822019; PubMed Central PMCID: PMC4598074.

321: Ndusilo ND, Heysell SK, Mpagama SG, Gratz J, Segesela FH, Pazia SJ, Wang XQ, Houpt ER, Kibiki GS. Improvement in plasma drug activity during the early treatment interval among Tanzanian patients with multidrug-resistant tuberculosis. *PLoS One*. 2015 Mar 27;10(3):e0122769. doi: 10.1371/journal.pone.0122769. eCollection 2015. PubMed PMID: 25816161; PubMed Central PMCID: PMC4376785.

322: Shahraki AH, Heidarieh P, Bostanabad SZ, Khosravi AD, Hashemzadeh M, Khandan S, Biranvand M, Schraufnagel DE, Mirsaeidi M. "Multidrug-resistant tuberculosis" may be nontuberculous mycobacteria. *Eur J Intern Med*. 2015 May;26(4):279-84. doi: 10.1016/j.ejim.2015.03.001. Epub 2015 Mar 14. PubMed PMID: 25784643; PubMed

Central PMCID: PMC4414892.

323: Wang Q, Zhang C, Guo J, Huang J, Xi X, Zhang L, Cui X. Super-compact treatment with a high dose of moxifloxacin in patients with drug-resistant tuberculosis and its resistance mechanisms. *Exp Ther Med*. 2015 Apr;9(4):1314-1318. Epub 2015 Jan 29. PubMed PMID: 25780428; PubMed Central PMCID: PMC4353789.

324: Kim W, Lee KS, Kim HS, Koh WJ, Jeong BH, Chung MJ, Jang HW. CT and microbiologic follow-up in primary multidrug-resistant pulmonary tuberculosis. *Acta Radiol*. 2016 Feb;57(2):197-204. doi: 10.1177/0284185115575196. Epub 2015 Mar 9. PubMed PMID: 25759483.

325: Frediani JK, Sanikidze E, Kipiani M, Tukvadze N, Hebbar G, Ramakrishnan U, Jones DP, Easley KA, Shenvi N, Kempker RR, Tangpricha V, Blumberg HM, Ziegler TR. Macronutrient intake and body composition changes during anti-tuberculosis therapy in adults. *Clin Nutr*. 2016 Feb;35(1):205-12. doi: 10.1016/j.clnu.2015.02.007. Epub 2015 Feb 26. PubMed PMID: 25753551; PubMed Central PMCID: PMC4550569.

326: Selvaraj P, Harishankar M, Afsal K. Vitamin D: Immuno-modulation and tuberculosis treatment. *Can J Physiol Pharmacol*. 2015 May;93(5):377-84. doi: 10.1139/cjpp-2014-0386. Epub 2015 Jan 19. Review. PubMed PMID: 25744368.

327: Wallis RS. Corticosteroid effects on sputum culture in pulmonary tuberculosis: a meta-regression analysis. *Open Forum Infect Dis*. 2014 Jun 3;1(1):ofu020. doi: 10.1093/ofid/ofu020. eCollection 2014 Mar. PubMed PMID: 25734093; PubMed Central PMCID: PMC4324181.

328: Farazi A, Shafaat O, Sofian M, Kahbazi M. Arginine adjunctive therapy in active tuberculosis. *Tuberc Res Treat*. 2015;2015:205016. doi: 10.1155/2015/205016. Epub 2015 Feb 3. PubMed PMID: 25734013; PubMed Central

PMCID: PMC4334935.

329: Wallis RS. Sputum culture conversion as a tuberculosis biomarker: a glass half empty or half full? *Lancet Respir Med*. 2015 Mar;3(3):174-5. doi: 10.1016/S2213-2600(15)00058-2. Epub 2015 Feb 26. PubMed PMID: 25726087.

330: Kurbatova EV, Cegielski JP, Lienhardt C, Akksilp R, Bayona J, Becerra MC, Caoili J, Contreras C, Dalton T, Danilovits M, Demikhova OV, Ershova J, Gammino VM, Gelmanova I, Heilig CM, Jou R, Kazenny B, Keshavjee S, Kim HJ, Kliiman K, Kvasnovsky C, Leimane V, Mitnick CD, Quelapio I, Riekstina V, Smith SE, Tupasi T, van der Walt M, Vasilyeva IA, Via LE, Viiklepp P, Volchenkov G, Walker AT, Wolfgang M, Yagui M, Zignol M. Sputum culture conversion as a prognostic marker for end-of-treatment outcome in patients with multidrug-resistant tuberculosis: a secondary analysis of data from two observational cohort studies. *Lancet Respir Med*. 2015 Mar;3(3):201-9. doi: 10.1016/S2213-2600(15)00036-3. Epub 2015 Feb 26. PubMed PMID: 25726085; PubMed Central PMCID: PMC4401426.

331: Mroz RM, Lisowski P, Tycinska A, Bierla J, Trzeciak PZ, Minarowski L, Milewski R, Lisowska A, Boros P, Sobkowicz B, Duszewska AM, Chyczewska E, Musial WJ, MacNee W. Anti-inflammatory effects of atorvastatin treatment in chronic obstructive pulmonary disease. A controlled pilot study. *J Physiol Pharmacol*. 2015 Feb;66(1):111-28. PubMed PMID: 25716971.

332: Kerstjens HA, Casale TB, Bleecker ER, Meltzer EO, Pizzichini E, Schmidt O, Engel M, Bour L, Verkleij CB, Moroni-Zentgraf P, Bateman ED. Tiotropium or salmeterol as add-on therapy to inhaled corticosteroids for patients with moderate symptomatic asthma: two replicate, double-blind, placebo-controlled, parallel-group, active-comparator, randomised trials. *Lancet Respir Med*. 2015 May;3(5):367-76. doi: 10.1016/S2213-2600(15)00031-4. Epub 2015 Feb 12. PubMed PMID: 25682232.

333: Szumowski JD, Lynch JB. Profile of delamanid for the treatment of multidrug-resistant tuberculosis. *Drug Des Devel Ther.* 2015 Jan 29;9:677-82. doi: 10.2147/DDDT.S60923. eCollection 2015. Review. PubMed PMID: 25678771; PubMed Central PMCID: PMC4319680.

334: Behnaz F, Mohammadzadeh M, Mohammadzade G. Five-year assessment of time of sputum smears conversion and outcome and risk factors of tuberculosis patients in central iran. *Tuberc Res Treat.* 2015;2015:609083. doi: 10.1155/2015/609083. Epub 2015 Jan 14. PubMed PMID: 25653874; PubMed Central PMCID: PMC4310312.

335: Diacon AH, Dawson R, von Groote-Bidlingmaier F, Symons G, Venter A, Donald PR, van Niekerk C, Everitt D, Hutchings J, Burger DA, Schall R, Mendel CM. Bactericidal activity of pyrazinamide and clofazimine alone and in combinations with pretomanid and bedaquiline. *Am J Respir Crit Care Med.* 2015 Apr 15;191(8):943-53. doi: 10.1164/rccm.201410-1801OC. PubMed PMID: 25622149.

336: Tan S, Ding X, Tan Y, Cai X, Li Y. [The therapeutic effect of regimens containing isoniazid and rifampicin for pulmonary tuberculosis with single isoniazid or rifampicin resistance]. *Zhonghua Jie He He Hu Xi Za Zhi.* 2014 Dec;37(12):915-8. Chinese. PubMed PMID: 25609129.

337: Tang S, Yao L, Hao X, Liu Y, Zeng L, Liu G, Li M, Li F, Wu M, Zhu Y, Sun H, Gu J, Wang X, Zhang Z. Clofazimine for the treatment of multidrug-resistant tuberculosis: prospective, multicenter, randomized controlled study in China. *Clin Infect Dis.* 2015 May 1;60(9):1361-7. doi: 10.1093/cid/civ027. Epub 2015 Jan 20. PubMed PMID: 25605283.

338: Mah A, Kharrat H, Ahmed R, Gao Z, Der E, Hansen E, Long R, Kunimoto D, Cooper R. Serum drug concentrations of INH and RMP predict 2-month sputum culture

results in tuberculosis patients. *Int J Tuberc Lung Dis.* 2015 Feb;19(2):210-5.  
doi: 10.5588/ijtld.14.0405. PubMed PMID: 25574921.

339: Volkmann T, Moonan PK, Miramontes R, Oeltmann JE. Tuberculosis and excess alcohol use in the United States, 1997-2012. *Int J Tuberc Lung Dis.* 2015 Jan;19(1):111-9. doi: 10.5588/ijtld.14.0516. PubMed PMID: 25519800; PubMed Central PMCID: PMC4798229.

340: Brode SK, Varadi R, McNamee J, Malek N, Stewart S, Jamieson FB, Avendano M. Multidrug-resistant tuberculosis: Treatment and outcomes of 93 patients. *Can Respir J.* 2015 Mar-Apr;22(2):97-102. Epub 2014 Dec 10. PubMed PMID: 25493698; PubMed Central PMCID: PMC4390019.

341: Khandelwal D, Gupta N, Mukherjee A, Lodha R, Singh V, Grewal HM, Bhatnagar S, Singh S, Kabra SK; Delhi Pediatric TB Study Group. Vitamin D levels in Indian children with intrathoracic tuberculosis. *Indian J Med Res.* 2014 Oct;140(4):531-7. PubMed PMID: 25488448; PubMed Central PMCID: PMC4277140.

342: Jajarm HH, Falaki F, Sanatkhani M, Ahmadzadeh M, Ahrari F, Shafae H. A comparative study of toluidine blue-mediated photodynamic therapy versus topical corticosteroids in the treatment of erosive-atrophic oral lichen planus: a randomized clinical controlled trial. *Lasers Med Sci.* 2015 Jul;30(5):1475-80. doi: 10.1007/s10103-014-1694-1. Epub 2014 Dec 9. PubMed PMID: 25487185.

343: Haridas V, Pean P, Jasenosky LD, Madec Y, Laureillard D, Sok T, Sath S, Borand L, Marcy O, Chan S, Tsitsikov E, Delfraissy JF, Blanc FX, Goldfeld AE; CAPRI-T (ANRS 12164) Study Team. TB-IRIS, T-cell activation, and remodeling of the T-cell compartment in highly immunosuppressed HIV-infected patients with TB. *AIDS.* 2015 Jan 28;29(3):263-73. doi: 10.1097/QAD.0000000000000546. PubMed PMID: 25486415; PubMed Central PMCID: PMC4649949.

344: Vasudevan K, Jayakumar N, Gnanasekaran D. Smear Conversion, Treatment Outcomes and the Time of Default in Registered Tuberculosis Patients on RNTCP DOTS in Puducherry, Southern India. *J Clin Diagn Res.* 2014 Oct;8(10):JC05-8. doi: 10.7860/JCDR/2014/8421.4984. Epub 2014 Oct 20. PubMed PMID: 25478371; PubMed Central PMCID: PMC4253189.

345: Tung YJ, Bittaye SO, Tsai JR, Lin CY, Huang CH, Chen TC, Lin WR, Chang K, Lai CC, Lu PL, Chen YH. Risk factors for microbiologic failure among Taiwanese adults with *Mycobacterium abscessus* complex pulmonary disease. *J Microbiol Immunol Infect.* 2015 Aug;48(4):437-45. doi: 10.1016/j.jmii.2014.08.005. Epub 2014 Oct 22. PubMed PMID: 25440976.

346: Venkat VL, Shneider BL, Magee JC, Turmelle Y, Arnon R, Bezerra JA, Hertel PM, Karpen SJ, Kerkar N, Loomes KM, Molleston J, Murray KF, Ng VL, Raghunathan T, Rosenthal P, Schwartz K, Sherker AH, Sokol RJ, Teckman J, Wang K, Whittington PF, Heubi JE; Childhood Liver Disease Research and Education Network. Total serum bilirubin predicts fat-soluble vitamin deficiency better than serum bile acids in infants with biliary atresia. *J Pediatr Gastroenterol Nutr.* 2014 Dec;59(6):702-7. doi: 10.1097/MPG.0000000000000547. PubMed PMID: 25419594; PubMed Central PMCID: PMC4243585.

347: Blair HA, Scott LJ. Delamanid: a review of its use in patients with multidrug-resistant tuberculosis. *Drugs.* 2015 Jan;75(1):91-100. doi: 10.1007/s40265-014-0331-4. Review. PubMed PMID: 25404020.

348: Jeong BH, Jeon K, Park HY, Kim SY, Lee KS, Huh HJ, Ki CS, Lee NY, Shin SJ, Daley CL, Koh WJ. Intermittent antibiotic therapy for nodular bronchiectatic *Mycobacterium avium* complex lung disease. *Am J Respir Crit Care Med.* 2015 Jan 1;191(1):96-103. doi: 10.1164/rccm.201408-1545OC. PubMed PMID: 25393520.

349: Critchley JA, Orton LC, Pearson F. Adjunctive steroid therapy for managing pulmonary tuberculosis. Cochrane Database Syst Rev. 2014 Nov 12;(11):CD011370. doi: 10.1002/14651858.CD011370. Review. PubMed PMID: 25387839.

350: Kim JH, Song WJ, Jun JE, Ryu DH, Lee JE, Jeong HJ, Jeong SH, Kang HK, Kim JS, Lee H, Chon HR, Jeon K, Kim D, Kim J, Koh WJ. Mycobacterium abscessus Lung Disease in a Patient with Kartagener Syndrome. Tuberc Respir Dis (Seoul). 2014 Sep;77(3):136-40. doi: 10.4046/trd.2014.77.3.136. Epub 2014 Sep 30. PubMed PMID: 25309609; PubMed Central PMCID: PMC4192312.

351: Kim SY, Koh WJ, Kim YH, Jeong BH, Park HY, Jeon K, Kim JS, Cho SN, Shin SJ. Importance of reciprocal balance of T cell immunity in Mycobacterium abscessus complex lung disease. PLoS One. 2014 Oct 8;9(10):e109941. doi: 10.1371/journal.pone.0109941. eCollection 2014. PubMed PMID: 25295870; PubMed Central PMCID: PMC4190320.

352: Morino E, Yanagawa Y, Takasaki J, Shimbo T, Sugiyama H, Kobayashi N. [New criteria enable shorter hospitalization of patients with continuously smear-positive pulmonary tuberculosis]. Kekkaku. 2014 Aug;89(8):697-702. Japanese. PubMed PMID: 25283010.

353: Andrade BB, Singh A, Narendran G, Schechter ME, Nayak K, Subramanian S, Anbalagan S, Jensen SM, Porter BO, Antonelli LR, Wilkinson KA, Wilkinson RJ, Meintjes G, van der Plas H, Follmann D, Barber DL, Swaminathan S, Sher A, Sereti I. Mycobacterial antigen driven activation of CD14++CD16- monocytes is a predictor of tuberculosis-associated immune reconstitution inflammatory syndrome. PLoS Pathog. 2014 Oct 2;10(10):e1004433. doi: 10.1371/journal.ppat.1004433. eCollection 2014 Oct. PubMed PMID: 25275318; PubMed Central PMCID: PMC4183698.

354: Arnedo-Pena A, Juan-Cerdá J, Romeu-García MA, García-Ferrer D,

Holguán-Gómez R, Iborra-Millet J, Pardo-Serrano F. Vitamin D status and incidence of tuberculosis infection conversion in contacts of pulmonary tuberculosis patients: a prospective cohort study. *Epidemiol Infect.* 2015 Jun;143(8):1731-41. doi: 10.1017/S0950268814002386. Epub 2014 Oct 2. PubMed PMID: 25274036.

355: Ito Y, Hirai T, Fujita K, Kubo T, Maekawa K, Ichiyama S, Togashi K, Mishima M. The influence of environmental exposure on the response to antimicrobial treatment in pulmonary Mycobacterial avium complex disease. *BMC Infect Dis.* 2014 Sep 29;14:522. doi: 10.1186/1471-2334-14-522. PubMed PMID: 25266993; PubMed Central PMCID: PMC4261885.

356: Ahsan MJ, Ansari MY, Yasmin S, Jadav SS, Kumar P, Garg SK, Aseri A, Khalilullah H. Tuberculosis: current treatment, diagnostics, and newer antitubercular agents in clinical trials. *Infect Disord Drug Targets.* 2015;15(1):32-41. Review. PubMed PMID: 25246035.

357: Tierney DB, Franke MF, Becerra MC, Alcántara Viriño FA, Bonilla CA, Sánchez E, Guerra D, Muñoz M, Llaro K, Palacios E, Mestanza L, Hurtado RM, Furin JJ, Shin S, Mitnick CD. Time to culture conversion and regimen composition in multidrug-resistant tuberculosis treatment. *PLoS One.* 2014 Sep 19;9(9):e108035. doi: 10.1371/journal.pone.0108035. eCollection 2014. PubMed PMID: 25238411; PubMed Central PMCID: PMC4169600.

358: Hire R, Kale AS, Dakhale GN, Gaikwad N. A prospective, observational study of adverse reactions to drug regimen for multi-drug resistant pulmonary tuberculosis in central India. *Mediterr J Hematol Infect Dis.* 2014 Sep 1;6(1):e2014061. doi: 10.4084/MJHID.2014.061. eCollection 2014. PubMed PMID: 25237474; PubMed Central PMCID: PMC4165500.

359: Tang S, Yao L, Hao X, Zhang X, Liu G, Liu X, Wu M, Zen L, Sun H, Liu Y, Gu

J, Lin F, Wang X, Zhang Z. Efficacy, safety and tolerability of linezolid for the treatment of XDR-TB: a study in China. *Eur Respir J*. 2015 Jan;45(1):161-70. doi: 10.1183/09031936.00035114. Epub 2014 Sep 18. PubMed PMID: 25234807.

360: Aung KJ, Van Deun A, Declercq E, Sarker MR, Das PK, Hossain MA, Rieder HL. Successful '9-month Bangladesh regimen' for multidrug-resistant tuberculosis among over 500 consecutive patients. *Int J Tuberc Lung Dis*. 2014 Oct;18(10):1180-7. doi: 10.5588/ijtld.14.0100. PubMed PMID: 25216831.

361: Nunn AJ, Rusen ID, Van Deun A, Torrea G, Phillips PP, Chiang CY, Squire SB, Madan J, Meredith SK. Evaluation of a standardized treatment regimen of anti-tuberculosis drugs for patients with multi-drug-resistant tuberculosis (STREAM): study protocol for a randomized controlled trial. *Trials*. 2014 Sep 9;15:353. doi: 10.1186/1745-6215-15-353. PubMed PMID: 25199531; PubMed Central PMCID: PMC4164715.

362: How SH, Kuan YC, Ng TH, Razali MR, Fauzi AR. Monitoring treatment response in sputum smear positive pulmonary tuberculosis patients: comparison of weight gain, sputum conversion and chest radiograph. *Malays J Pathol*. 2014 Aug;36(2):91-6. PubMed PMID: 25194531.

363: Pandie S, Engel ME, Kerbelker ZS, Mayosi BM. Mycobacterium w Immunotherapy for Treating Pulmonary Tuberculosis - a Systematic Review. *Curr Pharm Des*. 2014;20(39):6207-14. Review. PubMed PMID: 25190062.

364: Grisaru-Soen G, Savyon M, Sadot E, Schechner V, Sivan Y, Schwartz D, Tarabeia J, Amitai Z, Yoabov I, Carmeli Y. Congenital tuberculosis and management of exposure in neonatal and pediatric intensive care units. *Int J Tuberc Lung Dis*. 2014 Sep;18(9):1062-5. doi: 10.5588/ijtld.14.0160. PubMed PMID: 25189553.

365: Dharmadhikari AS, Mphahlele M, Venter K, Stoltz A, Mathebula R, Masotla T,

van der Walt M, Pagano M, Jensen P, Nardell E. Rapid impact of effective treatment on transmission of multidrug-resistant tuberculosis. *Int J Tuberc Lung Dis*. 2014 Sep;18(9):1019-25. doi: 10.5588/ijtld.13.0834. PubMed PMID: 25189547; PubMed Central PMCID: PMC4692272.

366: Mayosi BM, Ntsekhe M, Bosch J, Pandie S, Jung H, Gumedze F, Pogue J, Thabane L, Smieja M, Francis V, Joldersma L, Thomas KM, Thomas B, Awotedu AA, Magula NP, Naidoo DP, Damasceno A, Chitsa Banda A, Brown B, Manga P, Kirenga B, Mondo C, Mntla P, Tsitsi JM, Peters F, Essop MR, Russell JB, Hakim J, Matenga J, Barasa AF, Sani MU, Olunuga T, Ogah O, Ansa V, Aje A, Danbauchi S, Ojji D, Yusuf S; IMPI Trial Investigators. Prednisolone and *Mycobacterium indicus pranii* in tuberculous pericarditis. *N Engl J Med*. 2014 Sep 18;371(12):1121-30. doi: 10.1056/NEJMoal407380. Epub 2014 Sep 1. PubMed PMID: 25178809; PubMed Central PMCID: PMC4912834.

367: Anyim MC, Oshi DC, Chukwu JN, Aguwa EN, Johnson IN, Nwafor C, Meka AO, Ogbudebe C, Madichie NO, Ekeke N, Olanisebe SB. Sputum conversion at the end of 8 weeks among category 1 tuberculosis patients: How reliable are the peripheral laboratory results? *Int J Mycobacteriol*. 2014 Sep;3(3):178-83. doi: 10.1016/j.ijmyco.2014.06.005. Epub 2014 Jul 12. PubMed PMID: 26786486.

368: Olaru ID, Heyckendorf J, Grossmann S, Lange C. Time to culture positivity and sputum smear microscopy during tuberculosis therapy. *PLoS One*. 2014 Aug 29;9(8):e106075. doi: 10.1371/journal.pone.0106075. eCollection 2014. PubMed PMID: 25171337; PubMed Central PMCID: PMC4149502.

369: Diacon AH, Pym A, Grobusch MP, de los Rios JM, Gotuzzo E, Vasilyeva I, Leimane V, Andries K, Bakare N, De Marez T, Haxaire-Theeuwes M, Lounis N, Meyvisch P, De Paepe E, van Heeswijk RP, Dannemann B; TMC207-C208 Study Group. Multidrug-resistant tuberculosis and culture conversion with bedaquiline. *N Engl*

J Med. 2014 Aug 21;371(8):723-32. doi: 10.1056/NEJMoA1313865. PubMed  
PMID:  
25140958.

370: Lee HY, Chae KO, Lee CH, Choi SM, Lee J, Park YS, Lee SM, Yoo  
CG, Kim YW,  
Han SK, Yim JJ. Culture conversion rate at 2 months of treatment  
according to  
diagnostic methods among patients with culture-positive pulmonary  
tuberculosis.  
PLoS One. 2014 Aug 8;9(8):e103768. doi:  
10.1371/journal.pone.0103768. eCollection  
2014. PubMed PMID: 25105410; PubMed Central PMCID: PMC4126681.

371: Enomoto Y, Hagiwara E, Komatsu S, Nishihira R, Baba T, Kitamura  
H, Sekine A,  
Nakazawa A, Ogura T. Pilot quasi-randomized controlled study of  
herbal medicine  
Hochuekkito as an adjunct to conventional treatment for progressed  
pulmonary  
Mycobacterium avium complex disease. PLoS One. 2014 Aug  
5;9(8):e104411. doi:  
10.1371/journal.pone.0104411. eCollection 2014. PubMed PMID:  
25093868; PubMed  
Central PMCID: PMC4122490.

372: Gumbo T, Pasipanodya JG, Wash P, Burger A, McIlleron H.  
Redefining  
multidrug-resistant tuberculosis based on clinical response to  
combination  
therapy. Antimicrob Agents Chemother. 2014 Oct;58(10):6111-5. doi:  
10.1128/AAC.03549-14. Epub 2014 Aug 4. PubMed PMID: 25092691; PubMed  
Central  
PMCID: PMC4187940.

373: Kipiani M, Mirtskhulava V, Tukvadze N, Magee M, Blumberg HM,  
Kempker RR.  
Significant clinical impact of a rapid molecular diagnostic test  
(Genotype  
MTBDRplus assay) to detect multidrug-resistant tuberculosis. Clin  
Infect Dis.  
2014 Dec 1;59(11):1559-66. doi: 10.1093/cid/ciu631. Epub 2014 Aug 4.  
PubMed PMID:  
25091301; PubMed Central PMCID: PMC4357804.

374: Andrews B, Muchemwa L, Kelly P, Lakhi S, Heimbürger DC, Bernard  
GR.  
Simplified severe sepsis protocol: a randomized controlled trial of  
modified  
early goal-directed therapy in Zambia. Crit Care Med. 2014  
Nov;42(11):2315-24.

doi: 10.1097/CCM.0000000000000541. PubMed PMID: 25072757; PubMed Central PMCID: PMC4199893.

375: Charles M, Vilbrun SC, Koenig SP, Hashiguchi LM, Mabou MM, Ocheretina O, Pape JW. Treatment outcomes for patients with multidrug-resistant tuberculosis in post-earthquake Port-au-Prince, Haiti. *Am J Trop Med Hyg.* 2014 Oct;91(4):715-21. doi: 10.4269/ajtmh.14-0161. Epub 2014 Jul 28. PubMed PMID: 25071001; PubMed Central PMCID: PMC4183393.

376: Nijenbandring de Boer R, Cobelens FG, Kritski AL. Response from authors to letter from Eduardo Hernández-Garduño (TUBE 2013\_75) Tuberculosis monoresistance and culture conversion in smokers Nijenbandring de Boer R, et al., "Delayed culture conversion due to cigarette smoking in active pulmonary tuberculosis patients, *Tuberculosis* (2014) January". *Tuberculosis (Edinb).* 2014 Sep;94(5):532. doi: 10.1016/j.tube.2014.06.003. Epub 2014 Jun 28. PubMed PMID: 25066945.

377: Riou C, Gray CM, Lugongolo M, Gwala T, Kiravu A, Deniso P, Stewart-Isherwood L, Omar SV, Grobusch MP, Coetzee G, Conradie F, Ismail N, Kaplan G, Fallows D. A subset of circulating blood mycobacteria-specific CD4 T cells can predict the time to *Mycobacterium tuberculosis* sputum culture conversion. *PLoS One.* 2014 Jul 21;9(7):e102178. doi: 10.1371/journal.pone.0102178. eCollection 2014. PubMed PMID: 25048802; PubMed Central PMCID: PMC4105550.

378: Mendham AE, Duffield R, Marino F, Coutts AJ. Small-sided games training reduces CRP, IL-6 and leptin in sedentary, middle-aged men. *Eur J Appl Physiol.* 2014 Nov;114(11):2289-97. doi: 10.1007/s00421-014-2953-3. Epub 2014 Jul 22. PubMed PMID: 25048075.

379: Moraes ML, Ramalho DM, Delogo KN, Miranda PF, Mesquita ED, Oliveira HM, Ruffino-Netto A, Almeida PC, Hauser-Davis RA, Campos RC, Kritski AL, Oliveira MM.

Association between serum selenium level and conversion of bacteriological tests during antituberculosis treatment. *J Bras Pneumol*. 2014 May-Jun;40(3):269-78. English, Portuguese. PubMed PMID: 25029650; PubMed Central PMCID: PMC4109199.

380: Velayutham BV, Allaudeen IS, Sivaramakrishnan GN, Perumal V, Nair D, Chinnaiyan P, Paramasivam PK, Dhanaraj B, Santhanakrishnan RK, Navaneethapandian GP, Marimuthu MK, Kumar V, Kandasamy C, Dharuman K, Elangovan T, Narasimhan M, Rathinam S, Vadivelu G, Rathinam P, Chockalingam C, Jayabal L, Swaminathan S, Shaheed JM. Sputum culture conversion with moxifloxacin-containing regimens in the treatment of patients with newly diagnosed sputum-positive pulmonary tuberculosis in South India. *Clin Infect Dis*. 2014 Nov 15;59(10):e142-9. doi: 10.1093/cid/ciu550. Epub 2014 Jul 14. PubMed PMID: 25028463.

381: Sundy JS, Schumacher HR, Kivitz A, Weinstein SP, Wu R, King-Davis S, Evans RR. Riloncept for gout flare prevention in patients receiving uric acid-lowering therapy: results of RESURGE, a phase III, international safety study. *J Rheumatol*. 2014 Aug;41(8):1703-11. doi: 10.3899/jrheum.131226. Epub 2014 Jul 15. PubMed PMID: 25028379.

382: Mooventhan A, Khode V, Nivethitha L. Effect of yogic breathing techniques in new sputum positive pulmonary tuberculosis. *Int J Prev Med*. 2014 Jun;5(6):787-90. PubMed PMID: 25013700; PubMed Central PMCID: PMC4085933.

383: Hernández-Garduño E. Tuberculosis monoresistance and culture conversion in smokers. *Tuberculosis (Edinb)*. 2014 Sep;94(5):531. doi: 10.1016/j.tube.2014.06.008. Epub 2014 Jun 27. PubMed PMID: 25012140.

384: Kigozi NG, Chikobvu P, Heunis JC, van der Merwe S. A Retrospective Analysis of Two-Month Sputum Smear Non-Conversion in New Sputum Smear Positive Tuberculosis Patients in the Free State Province, South Africa. *J Public Health*

Afr. 2014 Jul 9;5(2):324. doi: 10.4081/jphia.2014.324. eCollection 2014 Jun 29.

PubMed PMID: 28299125; PubMed Central PMCID: PMC5345412.

385: Moraes ML, Ramalho DM, Delogo KN, Miranda PF, Mesquita ED, de Melo Guedes de Oliveira HM, Netto AR, Dos Anjos MJ, Kritski AL, de Oliveira MM. Association of serum levels of iron, copper, and zinc, and inflammatory markers with

bacteriological sputum conversion during tuberculosis treatment. Biol Trace Elem

Res. 2014 Aug;160(2):176-84. doi: 10.1007/s12011-014-0046-0. Epub 2014 Jun 24.

PubMed PMID: 24958018.

386: Fanai S, Viney K, Tarivonda L, Roseveare C, Tagaro M, Marais BJ. Profile of tuberculosis patients with delayed sputum smear conversion in the Pacific island

of Vanuatu. Public Health Action. 2014 Jun 21;4(Suppl 1):S19-24. doi:

10.5588/pha.13.0075. PubMed PMID: 26477281; PubMed Central PMCID: PMC4547598.

387: Muzzi A, Seminari E, Feletti T, Scudeller L, Marone P, Tinelli C, Minoli L,

Marena C, Mangiarotti P, Strosselli M. Post-exposure rate of tuberculosis

infection among health care workers measured with tuberculin skin test conversion

after unprotected exposure to patients with pulmonary tuberculosis: 6-year

experience in an Italian teaching hospital. BMC Infect Dis. 2014 Jun 12;14:324.

doi: 10.1186/1471-2334-14-324. PubMed PMID: 24919953; PubMed Central PMCID:

PMC4065580.

388: Bar-On O, Mussaffi H, Mei-Zahav M, Prais D, Steuer G, Stafler P, Hananya S,

Blau H. Increasing nontuberculous mycobacteria infection in cystic fibrosis. J

Cyst Fibros. 2015 Jan;14(1):53-62. doi: 10.1016/j.jcf.2014.05.008. Epub 2014 Jun

7. PubMed PMID: 24917112.

389: Putri FA, Burhan E, Nawas A, Soepandi PZ, Sutoyo DK, Agustin H, Isbaniah F,

Dowdy DW. Body mass index predictive of sputum culture conversion among MDR-TB

patients in Indonesia. *Int J Tuberc Lung Dis.* 2014 May;18(5):564-70. doi: 10.5588/ijtld.13.0602. PubMed PMID: 24903794.

390: Yoshiyama T, Morimoto K, Okumura M, Sasaki Y, Ogata H, Shiraishi Y, Kudou S. Long term outcome of multidrug-resistant TB patients in Fukujiji Hospital in Japan. *Trans R Soc Trop Med Hyg.* 2014 Sep;108(9):589-90. doi: 10.1093/trstmh/tru080. Epub 2014 Jun 5. PubMed PMID: 24902580.

391: Tian K, Kang Y, Deng L, Liu H, Li H, Wang Z, Zhao G. [Effects of different anesthesia depth on stress response in elderly patients undergoing elective laparoscopic surgery for colorectal cancer]. *Nan Fang Yi Ke Da Xue Xue Bao.* 2014 May;34(5):694-8. Chinese. PubMed PMID: 24849439.

392: Ukwaja KN, Oshi DC, Oshi SN, Alobu I. Profile and treatment outcome of smear-positive TB patients who failed to smear convert after 2 months of treatment in Nigeria. *Trans R Soc Trop Med Hyg.* 2014 Jul;108(7):431-8. doi: 10.1093/trstmh/tru070. Epub 2014 May 20. PubMed PMID: 24846911.

393: Gumbo T, Chigutsa E, Pasipanodya J, Visser M, van Helden PD, Sirgel FA, McIlleron H. The pyrazinamide susceptibility breakpoint above which combination therapy fails. *J Antimicrob Chemother.* 2014 Sep;69(9):2420-5. doi: 10.1093/jac/dku136. Epub 2014 May 12. PubMed PMID: 24821594; PubMed Central PMCID: PMC4130380.

394: Mfinanga SG, Kirenga BJ, Chanda DM, Mutayoba B, Mthiyane T, Yimer G, Ezechi O, Connolly C, Kapotwe V, Muwonge C, Massaga J, Sinkala E, Kohi W, Lyantumba L, Nyakoojo G, Luwaga H, Doulla B, Mzyece J, Kapata N, Vahedi M, Mwaba P, Egwaga S, Adatu F, Pym A, Joloba M, Rustomjee R, Zumla A, Onyebujoh P. Early versus delayed initiation of highly active antiretroviral therapy for HIV-positive adults with newly diagnosed pulmonary tuberculosis (TB-HAART): a prospective, international, randomised, placebo-controlled trial. *Lancet Infect Dis.* 2014 Jul;14(7):563-71.

doi: 10.1016/S1473-3099(14)70733-9. Epub 2014 May 5. Erratum in:  
Lancet Infect  
Dis. 2014 Jul;14(7):548. PubMed PMID: 24810491.

395: Jain K, Desai M, Solanki R, Dikshit RK. Treatment outcome of  
standardized  
regimen in patients with multidrug resistant tuberculosis. J  
Pharmacol  
Pharmacother. 2014 Apr;5(2):145-9. doi: 10.4103/0976-500X.130062.  
PubMed PMID:  
24799815; PubMed Central PMCID: PMC4008910.

396: Kalita J, Misra UK, Prasad S, Bhoi SK. Safety and efficacy of  
levofloxacin  
versus rifampicin in tuberculous meningitis: an open-label  
randomized controlled  
trial. J Antimicrob Chemother. 2014 Aug;69(8):2246-51. doi:  
10.1093/jac/dku103.  
Epub 2014 Apr 20. PubMed PMID: 24752957.

397: Magee MJ, Kempker RR, Kipiani M, Tukvadze N, Howards PP,  
Narayan KM,  
Blumberg HM. Diabetes mellitus, smoking status, and rate of sputum  
culture  
conversion in patients with multidrug-resistant tuberculosis: a  
cohort study from  
the country of Georgia. PLoS One. 2014 Apr 15;9(4):e94890. doi:  
10.1371/journal.pone.0094890. eCollection 2014. PubMed PMID:  
24736471; PubMed  
Central PMCID: PMC3988137.

398: Ong CW, Elkington PT, Friedland JS. Tuberculosis, pulmonary  
cavitation, and  
matrix metalloproteinases. Am J Respir Crit Care Med. 2014 Jul  
1;190(1):9-18.  
doi: 10.1164/rccm.201311-2106PP. PubMed PMID: 24713029; PubMed  
Central PMCID:  
PMC4226026.

399: Ibrahim LM, Oleribe OO, Nguku P, Tongwong GC, Mato LG, Longkyer  
MI, Ogiri S,  
Nsubuga P. Evaluation of quality of TB control services by private  
health care  
providers in Plateau state, Nigeria; 2012. Pan Afr Med J. 2014 Jan  
31;17:77. doi:  
10.11604/pamj.2014.17.77.3412. eCollection 2014. PubMed PMID:  
24711883; PubMed  
Central PMCID: PMC3972903.

400: Chand KS, Manchanda RK, Mittal R, Batra S, Banavaliker JN, De I. Homeopathic treatment in addition to standard care in multi drug resistant pulmonary tuberculosis: a randomized, double blind, placebo controlled clinical trial. Homeopathy. 2014 Apr;103(2):97-107. doi: 10.1016/j.homp.2013.12.003. Erratum in: Homeopathy. 2015 Jul;104(3):163. PubMed PMID: 24685414.

401: Hasan Z, Salahuddin N, Rao N, Aqeel M, Mahmood F, Ali F, Ashraf M, Rahman F, Mahmood S, Islam M, Dildar B, Anwer T, Oiighor F, Sharif N, Ullah AR. Change in serum CXCL10 levels during anti-tuberculosis treatment depends on vitamin D status [Short Communication]. Int J Tuberc Lung Dis. 2014 Apr;18(4):466-9. doi: 10.5588/ijtld.13.0460. PubMed PMID: 24670704.

402: Heunis JC, Kigozi NG, van der Merwe S, Chikobvu P, Beyers N. Sex-related trends in non-conversion of new smear-positive tuberculosis patients in the Free State, South Africa. Public Health Action. 2014 Mar 21;4(1):66-71. doi: 10.5588/pha.13.0108. PubMed PMID: 26423765; PubMed Central PMCID: PMC4479093.

403: Nagu TJ, Spiegelman D, Hertzmark E, Aboud S, Makani J, Matee MI, Fawzi W, Mugusi F. Anemia at the initiation of tuberculosis therapy is associated with delayed sputum conversion among pulmonary tuberculosis patients in Dar-es-Salaam, Tanzania. PLoS One. 2014 Mar 18;9(3):e91229. doi: 10.1371/journal.pone.0091229. eCollection 2014. PubMed PMID: 24642636; PubMed Central PMCID: PMC3958362.

404: Pefura-Yone EW, Kengne AP, Kuaban C. Non-conversion of sputum culture among patients with smear positive pulmonary tuberculosis in Cameroon: a prospective cohort study. BMC Infect Dis. 2014 Mar 11;14:138. doi: 10.1186/1471-2334-14-138. PubMed PMID: 24618155; PubMed Central PMCID: PMC3984706.

405: Lakshmanan M, Xavier AS. Bedaquiline - The first ATP synthase inhibitor

against multi drug resistant tuberculosis. *J Young Pharm.* 2013 Dec;5(4):112-5.  
doi: 10.1016/j.jyp.2013.12.002. Epub 2013 Dec 30. Review. PubMed  
PMID: 24563587;  
PubMed Central PMCID: PMC3930122.

406: Stoffel C, Lorenz R, Arce M, Rico M, Fernández L, Imaz MS. [Treatment of pulmonary tuberculosis in a low-prevalence urban area. Compliance and sputum conversion]. *Medicina (B Aires)*. 2014;74(1):9-18. Spanish. PubMed  
PMID: 24561834.

407: Nakamura A, Hagiwara E, Hamai J, Taguri M, Terauchi Y. Impact of underlying diabetes and presence of lung cavities on treatment outcomes in patients with pulmonary tuberculosis. *Diabet Med.* 2014 Jun;31(6):707-13. doi: 10.1111/dme.12414. Epub 2014 Mar 13. PubMed PMID: 24547904.

408: Skrahin A, Ahmed RK, Ferrara G, Rane L, Poiret T, Isaikina Y, Skrahina A, Zumla A, Maeurer MJ. Autologous mesenchymal stromal cell infusion as adjunct treatment in patients with multidrug and extensively drug-resistant tuberculosis: an open-label phase 1 safety trial. *Lancet Respir Med.* 2014 Feb;2(2):108-22. doi: 10.1016/S2213-2600(13)70234-0. Epub 2014 Jan 9. PubMed PMID: 24503266.

409: Viswanathan V, Vigneswari A, Selvan K, Satyavani K, Rajeswari R, Kapur A. Effect of diabetes on treatment outcome of smear-positive pulmonary tuberculosis--a report from South India. *J Diabetes Complications.* 2014 Mar-Apr;28(2):162-5. doi: 10.1016/j.jdiacomp.2013.12.003. Epub 2013 Dec 24. PubMed PMID: 24461545.

410: Zheng Y, Li XG, Wang QZ, Ma AG, Bygbjerg IC, Sun YY, Li Y, Zheng MC, Wang X. Enhancement of vitamin A combined vitamin D supplementation on immune response to Bacille Calmette-Guérin vaccine revaccinated in Chinese infants. *Asian Pac J Trop Med.* 2014 Feb;7(2):130-5. doi: 10.1016/S1995-7645(14)60008-0. PubMed PMID: 24461526.

411: Pefura-Yone EW, Kuaban C, Assamba-Mpom SA, Moifo B, Kengne AP. Derivation, validation and comparative performance of a simplified chest X-ray score for assessing the severity and outcome of pulmonary tuberculosis. Clin Respir J. 2015 Apr;9(2):157-64. doi: 10.1111/crj.12112. Epub 2014 Feb 21. PubMed PMID: 24460763.

412: Wallace RJ Jr, Brown-Elliott BA, McNulty S, Philley JV, Killingley J, Wilson RW, York DS, Shepherd S, Griffith DE. Macrolide/Azalide therapy for nodular/bronchiectatic mycobacterium avium complex lung disease. Chest. 2014 Aug;146(2):276-282. doi: 10.1378/chest.13-2538. PubMed PMID: 24457542; PubMed Central PMCID: PMC4694082.

413: Marx RE. The deception and fallacies of sponsored randomized prospective double-blinded clinical trials: the bisphosphonate research example. Int J Oral Maxillofac Implants. 2014 Jan-Feb;29(1):e37-44. doi: 10.11607/jomi.te40. PubMed PMID: 24451886.

414: Chaudhry LA, Al-Shamri AS, Ba Essa EM, Robert AA, Al-Solaiman S, Al-Nwasser AH. The rates of sputum conversion among new smear positive open pulmonary tuberculosis patients treated under directly observed treatment, short course strategy. Saudi Med J. 2014 Jan;35(1):39-43. PubMed PMID: 24445888.

415: Pietersen E, Ignatius E, Streicher EM, Mastrapa B, Padanilam X, Pooran A, Badri M, Lesosky M, van Helden P, Sirgel FA, Warren R, Dheda K. Long-term outcomes of patients with extensively drug-resistant tuberculosis in South Africa: a cohort study. Lancet. 2014 Apr 5;383(9924):1230-9. doi: 10.1016/S0140-6736(13)62675-6. Epub 2014 Jan 17. PubMed PMID: 24439237.

416: Duan HF, Chu NH, Wang QF, Wang J, Huang HR, Liang Q. [Mycobacterium abscessus group lung disease: case reports and review of the literature]. Zhonghua Jie He He Hu Xi Za Zhi. 2013 Sep;36(9):671-4. Review. Chinese. PubMed PMID: 24423821.

417: Bonnet M, Baudin E, Jani IV, Nunes E, Verhoustraten F, Calmy A, Bastos R, Bhatt NB, Michon C. Incidence of paradoxical tuberculosis-associated immune reconstitution inflammatory syndrome and impact on patient outcome. PLoS One. 2013 Dec 18;8(12):e84585. doi: 10.1371/journal.pone.0084585. eCollection 2013. Erratum in: PLoS One. 2014;9(1). doi:10.1371/annotation/15d01128-2495-4b95-8fe8-8702190fdb0e. PubMed PMID: 24367678; PubMed Central PMCID: PMC3867516.

418: Kim SY, Koh WJ, Park HY, Jeon K, Kwon OJ, Cho SN, Shin SJ. Changes in serum immunomolecules during antibiotic therapy for Mycobacterium avium complex lung disease. Clin Exp Immunol. 2014 Apr;176(1):93-101. doi: 10.1111/cei.12253. PubMed PMID: 24354934; PubMed Central PMCID: PMC3958158.

419: Roongruangpitayakul C, Chuchottaworn C. Outcomes of MDR/XDR-TB patients treated with linezolid: experience in Thailand. J Med Assoc Thai. 2013 Oct;96(10):1273-82. PubMed PMID: 24350407.

420: Takeuchi M, Kurata M, Hayashi S. [Nutritional assessment upon admission for predicting delay in negative bacillary conversion among patients treated for pulmonary tuberculosis]. Kekkaku. 2013 Oct;88(10):697-702. Japanese. PubMed PMID: 24341174.

421: Nijenbandring de Boer R, Oliveira e Souza Filho JB, Cobelens F, Ramalho Dde P, Campino Miranda PF, Logo Kd, Oliveira H, Mesquita E, Oliveira MM, Kritski A. Delayed culture conversion due to cigarette smoking in active pulmonary tuberculosis patients. Tuberculosis (Edinb). 2014 Jan;94(1):87-91. doi: 10.1016/j.tube.2013.10.005. Epub 2013 Oct 31. PubMed PMID: 24321739.

422: Miwa S, Shirai M, Toyoshima M, Shirai T, Yasuda K, Yokomura K, Yamada T, Masuda M, Inui N, Chida K, Suda T, Hayakawa H. Efficacy of clarithromycin and

ethambutol for Mycobacterium avium complex pulmonary disease. A preliminary study. *Ann Am Thorac Soc*. 2014 Jan;11(1):23-9. doi: 10.1513/AnnalsATS.201308-266OC. PubMed PMID: 24298907.

423: Singla R, Bharty SK, Gupta UA, Khayyam KU, Vohra V, Singla N, Myneedu VP, Behera D. Sputum smear positivity at two months in previously untreated pulmonary tuberculosis patients. *Int J Mycobacteriol*. 2013 Dec;2(4):199-205. doi: 10.1016/j.ijmyco.2013.08.002. Epub 2013 Sep 14. PubMed PMID: 26786122.

424: Rueda ZV, Lpez L, Vlez LA, Marn D, Giraldo MR, Pulido H, Orozco LC, Montes F, Arbelez MP. High incidence of tuberculosis, low sensitivity of current diagnostic scheme and prolonged culture positivity in four colombian prisons. A cohort study. *PLoS One*. 2013 Nov 21;8(11):e80592. doi: 10.1371/journal.pone.0080592. eCollection 2013. PubMed PMID: 24278293; PubMed Central PMCID: PMC3836852.

425: Mpagama SG, Ndusilo N, Stroup S, Kumburu H, Peloquin CA, Gratz J, Houpt ER, Kibiki GS, Heysell SK. Plasma drug activity in patients on treatment for multidrug-resistant tuberculosis. *Antimicrob Agents Chemother*. 2014;58(2):782-8. doi: 10.1128/AAC.01549-13. Epub 2013 Nov 18. PubMed PMID: 24247125; PubMed Central PMCID: PMC3910816.

426: Shah I, Meshram L. High dose versus low dose steroids in children with tuberculous meningitis. *J Clin Neurosci*. 2014 May;21(5):761-4. doi: 10.1016/j.jocn.2013.07.021. Epub 2013 Nov 11. PubMed PMID: 24231560.

427: Luetkemeyer AF, Kendall MA, Nyirenda M, Wu X, Ive P, Benson CA, Andersen JW, Swindells S, Sanne IM, Havlir DV, Kumwenda J; Adult AIDS Clinical Trials Group A5221 Study Team. Tuberculosis immune reconstitution inflammatory syndrome in A5221 STRIDE: timing, severity, and implications for HIV-TB programs. *J Acquir Immune Defic Syndr*. 2014 Apr 1;65(4):423-8. doi: 10.1097/QAI.0000000000000030. PubMed PMID: 24226057; PubMed Central PMCID: PMC3943693.

428: Bouchikh M, Achir A, Caidi M, El Aziz S, Benosman A. [Role of pulmonary resections in management of multidrug-resistant tuberculosis. A monocentric series of 29 patients]. Rev Pneumol Clin. 2013 Dec;69(6):326-30. doi: 10.1016/j.pneumo.2013.09.002. Epub 2013 Nov 6. French. PubMed PMID: 24210152.

429: Ungurs MJ, Sinden NJ, Stockley RA. Progranulin is a substrate for neutrophil-elastase and proteinase-3 in the airway and its concentration correlates with mediators of airway inflammation in COPD. Am J Physiol Lung Cell Mol Physiol. 2014 Jan 1;306(1):L80-7. doi: 10.1152/ajplung.00221.2013. Epub 2013 Nov 1. PubMed PMID: 24186875.

430: Mukherjee A, Saini S, Kabra SK, Gupta N, Singh V, Singh S, Bhatnagar S, Saini D, Grewal HM, Lodha R; Delhi TB Study group. Effect of micronutrient deficiency on QuantiFERON-TB Gold In-Tube test and tuberculin skin test in diagnosis of childhood intrathoracic tuberculosis. Eur J Clin Nutr. 2014 Jan;68(1):38-42. doi: 10.1038/ejcn.2013.216. Epub 2013 Oct 30. PubMed PMID: 24169461.

431: Centers for Disease Control and Prevention. Provisional CDC guidelines for the use and safety monitoring of bedaquiline fumarate (Sirturo) for the treatment of multidrug-resistant tuberculosis. MMWR Recomm Rep. 2013 Oct 25;62(RR-09):1-12. Erratum in: MMWR Recomm Rep. 2013 Nov 15;62(45):906. PubMed PMID: 24157696.

432: Tadokera R, Meintjes GA, Wilkinson KA, Skolimowska KH, Walker N, Friedland JS, Maartens G, Elkington PT, Wilkinson RJ. Matrix metalloproteinases and tissue damage in HIV-tuberculosis immune reconstitution inflammatory syndrome. Eur J Immunol. 2014 Jan;44(1):127-36. doi: 10.1002/eji.201343593. Epub 2013 Oct 30. PubMed PMID: 24136296; PubMed Central PMCID: PMC3992843.

433: Mi F, Tan S, Liang L, Harries AD, Hinderaker SG, Lin Y, Yue W, Chen X, Liang B, Gong F, Du J. Diabetes mellitus and tuberculosis: pattern of tuberculosis, two-month smear conversion and treatment outcomes in Guangzhou, China. Trop Med Int Health. 2013 Nov;18(11):1379-85. doi: 10.1111/tmi.12198. Epub 2013 Sep 23. PubMed PMID: 24112411.

434: Dooley KE, Nuermberger EL, Diacon AH. Pipeline of drugs for related diseases: tuberculosis. Curr Opin HIV AIDS. 2013 Nov;8(6):579-85. doi: 10.1097/COH.0000000000000009. Review. PubMed PMID: 24100880; PubMed Central PMCID: PMC5206795.

435: Vashishtha R, Mohan K, Singh B, Devarapu SK, Sreenivas V, Ranjan S, Gupta D, Sinha S, Sharma SK. Efficacy and safety of thrice weekly DOTS in tuberculosis patients with and without HIV co-infection: an observational study. BMC Infect Dis. 2013 Oct 7;13:468. doi: 10.1186/1471-2334-13-468. PubMed PMID: 24099345; PubMed Central PMCID: PMC3852441.

436: Dobler CC, Luu Q, Marks GB. What patient factors predict physicians' decision not to treat latent tuberculosis infection in tuberculosis contacts? PLoS One. 2013 Sep 30;8(9):e76552. doi: 10.1371/journal.pone.0076552. eCollection 2013. PubMed PMID: 24098794; PubMed Central PMCID: PMC3786986.

437: Kenangalem E, Waramori G, Pontororing GJ, Sandjaja, Tjitra E, Maguire G, Kelly PM, Anstey NM, Ralph AP. Tuberculosis outcomes in Papua, Indonesia: the relationship with different body mass index characteristics between papuan and non-Papuan ethnic groups. PLoS One. 2013 Sep 27;8(9):e76077. doi: 10.1371/journal.pone.0076077. eCollection 2013. PubMed PMID: 24086690; PubMed Central PMCID: PMC3785441.

438: Kayigamba FR, Bakker MI, Mugisha V, De Naeyer L, Gasana M, Cobelens F, van

der Loeff MS. Adherence to tuberculosis treatment, sputum smear conversion and mortality: a retrospective cohort study in 48 Rwandan clinics. PLoS One. 2013 Sep 16;8(9):e73501. doi: 10.1371/journal.pone.0073501. eCollection 2013. PubMed PMID: 24066053; PubMed Central PMCID: PMC3774710.

439: Tripathy SK, Kumar P, Sagili KD, Enarson DA. Effectiveness of a community-based observation of anti-tuberculosis treatment in Bangalore City, India, 2010-2011. Public Health Action. 2013 Sep 21;3(3):230-4. doi: 10.5588/pha.13.0043. PubMed PMID: 26393035; PubMed Central PMCID: PMC4463128.

440: Brust JC, Berman AR, Zalta B, Haramati LB, Ning Y, Heo M, van der Merwe TL, Bamber S, Moll AP, Friedland GH, Shah NS, Gandhi NR. Chest radiograph findings and time to culture conversion in patients with multidrug-resistant tuberculosis and HIV in Tugela Ferry, South Africa. PLoS One. 2013 Sep 6;8(9):e73975. doi: 10.1371/journal.pone.0073975. eCollection 2013. PubMed PMID: 24040132; PubMed Central PMCID: PMC3765317.

441: Seung KJ, Becerra MC, Atwood SS, Alc ntara F, Bonilla CA, Mitnick CD. Salvage therapy for multidrug-resistant tuberculosis. Clin Microbiol Infect. 2014 May;20(5):441-6. doi: 10.1111/1469-0691.12335. Epub 2013 Aug 30. PubMed PMID: 23991934.

442: Yang SH, Zhan P, Mao HH, Shi XD, Wang LL. Perfusing chemotherapy by percutaneous lung puncture "holing" for pulmonary tuberculoma-a ten-year single center experience. J Thorac Dis. 2013 Aug;5(4):466-71. doi: 10.3978/j.issn.2072-1439.2013.07.03. PubMed PMID: 23991304; PubMed Central PMCID: PMC3755674.

443: Ralph AP, Waramori G, Pontororing GJ, Kenangalem E, Wiguna A, Tjitra E, Sandjaja, Lolong DB, Yeo TW, Chatfield MD, Soemanto RK, Bastian I, Lumb R, Maguire GP, Eisman J, Price RN, Morris PS, Kelly PM, Anstey NM. L-arginine and

vitamin D adjunctive therapies in pulmonary tuberculosis: a randomised, double-blind, placebo-controlled trial. PLoS One. 2013 Aug 14;8(8):e70032. doi: 10.1371/journal.pone.0070032. eCollection 2013. PubMed PMID: 23967066; PubMed Central PMCID: PMC3743888.

444: Schiff M, Weinblatt ME, Valente R, van der Heijde D, Citera G, Elegbe A, Maldonado M, Fleischmann R. Head-to-head comparison of subcutaneous abatacept versus adalimumab for rheumatoid arthritis: two-year efficacy and safety findings from AMPLE trial. Ann Rheum Dis. 2014 Jan;73(1):86-94. doi: 10.1136/annrheumdis-2013-203843. Epub 2013 Aug 20. PubMed PMID: 23962455; PubMed Central PMCID: PMC3888617.

445: Unsematham S, Kateruttanakul P. Factors predicting sputum smear conversion and treatment outcomes in new smear-positive pulmonary tuberculosis. J Med Assoc Thai. 2013 Jun;96(6):644-9. PubMed PMID: 23951819.

446: Chang B, Han SG, Kim W, Ko Y, Song J, Hong G, Eom JS, Lee JH, Jhun BW, Koh WJ. Normalization of Elevated CA 19-9 Level after Treatment in a Patient with the Nodular Bronchiectatic Form of Mycobacterium abscessus Lung Disease. Tuberc Respir Dis (Seoul). 2013 Jul;75(1):25-7. doi: 10.4046/trd.2013.75.1.25. Epub 2013 Jul 31. PubMed PMID: 23946755; PubMed Central PMCID: PMC3741470.

447: Koh WJ, Lee SH, Kang YA, Lee CH, Choi JC, Lee JH, Jang SH, Yoo KH, Jung KH, Kim KU, Choi SB, Ryu YJ, Chan Kim K, Um S, Kwon YS, Kim YH, Choi WI, Jeon K, Hwang YI, Kim SJ, Lee YS, Heo EY, Lee J, Ki YW, Shim TS, Yim JJ. Comparison of levofloxacin versus moxifloxacin for multidrug-resistant tuberculosis. Am J Respir Crit Care Med. 2013 Oct 1;188(7):858-64. doi: 10.1164/rccm.201303-0604OC. PubMed PMID: 23927582.

448: Flora MS, Amin MN, Karim MR, Afroz S, Islam S, Alam A, Hossain M. Risk factors of multi-drug-resistant tuberculosis in Bangladeshi population: a case

control study. Bangladesh Med Res Counc Bull. 2013 Apr;39(1):34-41.  
PubMed PMID:  
23923410.

449: Kobayashi H, Koyanagi K, Kato O, Oe T. [Outbreak of extensively drug-resistant pulmonary tuberculosis in a hemodialysis facility]. Kekkaku. 2013 May;88(5):477-84. Japanese. PubMed PMID: 23882728.

450: da Silva TP, Giacoia-Gripp CB, Schmaltz CA, Sant Anna FM, Rolla V, Morgado MG. T Cell Activation and Cytokine Profile of Tuberculosis and HIV-Positive Individuals during Antituberculous Treatment and Efavirenz-Based Regimens. PLoS One. 2013 Jun 19;8(6):e66095. doi: 10.1371/journal.pone.0066095. Print 2013.  
PubMed PMID: 23840403; PubMed Central PMCID: PMC3686825.

451: Wejse C, Furtado A, Camara C, L  neborg-Nielsen M, Sodemann M, Gerstoft J, Katzenstein TL. Impact of tuberculosis treatment on CD4 cell count, HIV RNA, and p24 antigen in patients with HIV and tuberculosis. Int J Infect Dis. 2013 Oct;17(10):e907-12. doi: 10.1016/j.ijid.2013.05.003. Epub 2013 Jun 28. PubMed PMID: 23816410.

452: Faurholt-Jepsen D. The double burden. Dan Med J. 2013 Jul;60(7):B4673.  
PubMed PMID: 23809978.

453: Chang KC, Yew WW, Tam CM, Leung CC. WHO group 5 drugs and difficult multidrug-resistant tuberculosis: a systematic review with cohort analysis and meta-analysis. Antimicrob Agents Chemother. 2013 Sep;57(9):4097-104. doi: 10.1128/AAC.00120-13. Epub 2013 Jun 17. Review. PubMed PMID: 23774431; PubMed Central PMCID: PMC3754286.

454: Sandborn WJ, Feagan BG, Marano C, Zhang H, Strauss R, Johanns J, Adedokun OJ, Guzzo C, Colombel JF, Reinisch W, Gibson PR, Collins J, J  rnerot G, Rutgeerts P; PURSUIT-Maintenance Study Group. Subcutaneous golimumab maintains clinical response in patients with moderate-to-severe ulcerative colitis.

Gastroenterology. 2014 Jan;146(1):96-109.e1. doi:  
10.1053/j.gastro.2013.06.010.  
Epub 2013 Jun 14. PubMed PMID: 23770005.

455: Duangrithi D, Thanachartwet V, Desakorn V, Jitruckthai P,  
Phojanamongkolkij  
K, Rienthong S, Chuchottaworn C, Pitisuttithum P. Impact of diabetes  
mellitus on  
clinical parameters and treatment outcomes of newly diagnosed  
pulmonary  
tuberculosis patients in Thailand. Int J Clin Pract. 2013  
Nov;67(11):1199-209.  
doi: 10.1111/ijcp.12215. Epub 2013 Jun 10. PubMed PMID: 23750554;  
PubMed Central  
PMCID: PMC4232236.

456: Xie B, Yang Y, He W, Xie D, Jiang G. Pulmonary resection in the  
treatment of  
43 patients with well-localized, cavitary pulmonary multidrug-  
resistant  
tuberculosis in Shanghai. Interact Cardiovasc Thorac Surg. 2013  
Sep;17(3):455-9.  
doi: 10.1093/icvts/ivt251. Epub 2013 Jun 7. PubMed PMID: 23748869;  
PubMed Central  
PMCID: PMC3745155.

457: Ziganshina LE, Titarenko AF, Davies GR. Fluoroquinolones for  
treating  
tuberculosis (presumed drug-sensitive). Cochrane Database Syst Rev.  
2013 Jun  
6;(6):CD004795. doi: 10.1002/14651858.CD004795.pub4. Review. PubMed  
PMID:  
23744519.

458: Click ES, Winston CA, Oeltmann JE, Moonan PK, Mac Kenzie WR.  
Association  
between Mycobacterium tuberculosis lineage and time to sputum  
culture conversion.  
Int J Tuberc Lung Dis. 2013 Jul;17(7):878-84. doi:  
10.5588/ijtld.12.0732. PubMed  
PMID: 23743308.

459: Ralph AP, Yeo TW, Salome CM, Waramori G, Pontororing GJ,  
Kenangalem E,  
Sandjaja, Tjitra E, Lumb R, Maguire GP, Price RN, Chatfield MD,  
Kelly PM, Anstey  
NM. Impaired pulmonary nitric oxide bioavailability in pulmonary  
tuberculosis:  
association with disease severity and delayed mycobacterial  
clearance with

treatment. *J Infect Dis.* 2013 Aug 15;208(4):616-26. doi:  
10.1093/infdis/jit248.  
Epub 2013 Jun 3. PubMed PMID: 23737604; PubMed Central PMCID:  
PMC3719909.

460: Carroll MW, Jeon D, Mountz JM, Lee JD, Jeong YJ, Zia N, Lee M,  
Lee J, Via  
LE, Lee S, Eum SY, Lee SJ, Goldfeder LC, Cai Y, Jin B, Kim Y, Oh T,  
Chen RY, Dodd  
LE, Gu W, Dartois V, Park SK, Kim CT, Barry CE 3rd, Cho SN. Efficacy  
and safety  
of metronidazole for pulmonary multidrug-resistant tuberculosis.  
*Antimicrob  
Agents Chemother.* 2013 Aug;57(8):3903-9. doi: 10.1128/AAC.00753-13.  
Epub 2013 Jun  
3. PubMed PMID: 23733467; PubMed Central PMCID: PMC3719751.

461: Narendran G, Andrade BB, Porter BO, Chandrasekhar C, Venkatesan  
P, Menon PA,  
Subramanian S, Anbalagan S, Bhavani KP, Sekar S, Padmapriyadarshini  
C, Kumar S,  
Ravichandran N, Raja K, Bhanu K, Mahilmaran A, Sekar L, Sher A,  
Sereti I,  
Swaminathan S. Paradoxical tuberculosis immune reconstitution  
inflammatory  
syndrome (TB-IRIS) in HIV patients with culture confirmed pulmonary  
tuberculosis  
in India and the potential role of IL-6 in prediction. *PLoS One.*  
2013 May  
17;8(5):e63541. doi: 10.1371/journal.pone.0063541. Print 2013.  
PubMed PMID:  
23691062; PubMed Central PMCID: PMC3656926.

462: Burhan E, Ruesen C, Ruslami R, Ginanjar A, Mangunegoro H,  
Ascobat P,  
Donders R, van Crevel R, Aarnoutse R. Isoniazid, rifampin, and  
pyrazinamide  
plasma concentrations in relation to treatment response in  
Indonesian pulmonary  
tuberculosis patients. *Antimicrob Agents Chemother.* 2013  
Aug;57(8):3614-9. doi:  
10.1128/AAC.02468-12. Epub 2013 May 20. PubMed PMID: 23689725;  
PubMed Central  
PMCID: PMC3719785.

463: Masuyama H, Igari H. [Reconsideration of the admission and  
discharge  
criteria of tuberculosis patients in Japan]. *Kekkaku.* 2013  
Mar;88(3):373-85.  
Japanese. PubMed PMID: 23672177.

464: Ogawa K, Sano C. [Strategies for Mycobacterium avium complex infection control in Japan: how do they improve the present situation?]. Kekkaku. 2013 Mar;88(3):355-71. Japanese. PubMed PMID: 23672176.

465: Shean K, Streicher E, Pieterse E, Symons G, van Zyl Smit R, Theron G, Lehloenyana R, Padanilam X, Wilcox P, Victor TC, van Helden P, Grobusch MP, Warren R, Badri M, Dheda K. Drug-associated adverse events and their relationship with outcomes in patients receiving treatment for extensively drug-resistant tuberculosis in South Africa. PLoS One. 2013 May 7;8(5):e63057. doi: 10.1371/journal.pone.0063057. Print 2013. Erratum in: PLoS One. 2013;8(5). doi:10.1371/annotation/644591a8-8ae6-450e-974e-1cd1f08f52c7. Groubusch, Martin [corrected to Grobusch, Martin P]. PubMed PMID: 23667572; PubMed Central PMCID: PMC3646906.

466: Chang KC, Yew WW, Cheung SW, Leung CC, Tam CM, Chau CH, Wen PK, Chan RC. Can intermittent dosing optimize prolonged linezolid treatment of difficult multidrug-resistant tuberculosis? Antimicrob Agents Chemother. 2013 Jul;57(7):3445-9. doi: 10.1128/AAC.00388-13. Epub 2013 May 6. PubMed PMID: 23650165; PubMed Central PMCID: PMC3697330.

467: Faurholt-Jepsen D, Range N, PrayGod G, Jeremiah K, Faurholt-Jepsen M, Aabye MG, Changalucha J, Christensen DL, Grewal HM, Martinussen T, Krarup H, Witte DR, Andersen AB, Friis H. Diabetes is a strong predictor of mortality during tuberculosis treatment: a prospective cohort study among tuberculosis patients from Mwanza, Tanzania. Trop Med Int Health. 2013 Jul;18(7):822-9. doi: 10.1111/tmi.12120. Epub 2013 May 6. PubMed PMID: 23648145.

468: O'Donnell MR, Padayatchi N, Kvasnovsky C, Werner L, Master I, Horsburgh CR Jr. Treatment outcomes for extensively drug-resistant tuberculosis and HIV co-infection. Emerg Infect Dis. 2013 Mar;19(3):416-24. doi: 10.3201/eid1903.120998. PubMed PMID: 23622055; PubMed Central PMCID: PMC3647656.

469: Ugarte-Gil CA, Elkington P, Gilman RH, Coronel J, Tezera LB, Bernabe-Ortiz A, Gotuzzo E, Friedland JS, Moore DA. Induced sputum MMP-1, -3 & -8 concentrations during treatment of tuberculosis. PLoS One. 2013 Apr 22;8(4):e61333. doi: 10.1371/journal.pone.0061333. Print 2013. PubMed PMID: 23613834; PubMed Central PMCID: PMC3632571.

470: Jiang RH, Xu HB, Li L. Comparative roles of moxifloxacin and levofloxacin in the treatment of pulmonary multidrug-resistant tuberculosis: a retrospective study. Int J Antimicrob Agents. 2013 Jul;42(1):36-41. doi: 10.1016/j.ijantimicag.2013.02.019. Epub 2013 Apr 11. PubMed PMID: 23582696.

471: Mandal PK, Mandal A, Bhattacharyya SK. Comparing the Daily Versus the Intermittent Regimens of the Anti-Tubercular Chemotherapy in the Initial Intensive Phase in Non-HIV, Sputum Positive, Pulmonary Tuberculosis Patients. J Clin Diagn Res. 2013 Feb;7(2):292-5. doi: 10.7860/JCDR/2013/5122.2750. Epub 2012 Dec 24. PubMed PMID: 23542708; PubMed Central PMCID: PMC3592295.

472: Jayakody W, Harries AD, Malhotra S, de Alwis S, Samaraweera S, Pallewatta N. Characteristics and outcomes of tuberculosis patients who fail to smear convert at two months in Sri Lanka. Public Health Action. 2013 Mar 21;3(1):26-30. doi: 10.5588/pha.12.0090. PubMed PMID: 26392992; PubMed Central PMCID: PMC4463095.

473: Koh WJ, Hong G, Kim SY, Jeong BH, Park HY, Jeon K, Kwon OJ, Lee SH, Kim CK, Shin SJ. Treatment of refractory Mycobacterium avium complex lung disease with a moxifloxacin-containing regimen. Antimicrob Agents Chemother. 2013 May;57(5):2281-5. doi: 10.1128/AAC.02281-12. Epub 2013 Mar 11. PubMed PMID: 23478956; PubMed Central PMCID: PMC3632919.

474: Huang F, Gu J, Zhu P, Bao C, Xu J, Xu H, Wu H, Wang G, Shi Q, Andhivarothai N, Anderson J, Pangan AL. Efficacy and safety of adalimumab in Chinese adults with active ankylosing spondylitis: results of a randomised, controlled trial.

Ann Rheum Dis. 2014 Mar;73(3):587-94. doi: 10.1136/annrheumdis-2012-202533. Epub  
2013 Mar 8. PubMed PMID: 23475983.

475: Escalante P, McKean-Cowdin R, Ramaswamy SV, Williams-Bouyer N, Teeter LD, Jones BE, Graviss EA. Can mycobacterial katG genetic changes in isoniazid-resistant tuberculosis influence human disease features? Int J Tuberc Lung Dis. 2013 May;17(5):644-51. doi: 10.5588/ijtld.12.0380. Epub 2013 Mar 1. PubMed PMID: 23453008.

476: Wang Q, Ma A, Bygbjerg IC, Han X, Liu Y, Zhao S, Cai J. Rationale and design of a randomized controlled trial of the effect of retinol and vitamin D supplementation on treatment in active pulmonary tuberculosis patients with diabetes. BMC Infect Dis. 2013 Feb 26;13:104. doi: 10.1186/1471-2334-13-104. PubMed PMID: 23442225; PubMed Central PMCID: PMC3599006.

477: Parikh R, Nataraj G, Kanade S, Khatri V, Mehta P. Time to sputum conversion in smear positive pulmonary TB patients on category I DOTS and factors delaying it. J Assoc Physicians India. 2012 Aug;60:22-6. PubMed PMID: 23405517.

478: Tiwari S, Kumar A, Kapoor SK. Relationship between sputum smear grading and smear conversion rate and treatment outcome in the patients of pulmonary tuberculosis undergoing dots--a prospective cohort study. Indian J Tuberc. 2012 Jul;59(3):135-40. PubMed PMID: 23362709.

479: Mayosi BM, Ntsekhe M, Bosch J, Pogue J, Gumedze F, Badri M, Jung H, Pandie S, Smieja M, Thabane L, Francis V, Thomas KM, Thomas B, Awotedu AA, Magula NP, Naidoo DP, Damasceno A, Banda AC, Mutyaba A, Brown B, Ntuli P, Mntla P, Ntyintyane L, Ramjee R, Manga P, Kirenga B, Mondo C, Russell JB, Tsitsi JM, Peters F, Essop MR, Barasa AF, Mijinyawa MS, Sani MU, Olunuga T, Ogah O, Adebisi A, Aje A, Ansa V, Ojji D, Danbauchi S, Hakim J, Matenga J, Yusuf S. Rationale and

design of the Investigation of the Management of Pericarditis (IMPI) trial: a 2 Å-  
2 factorial randomized double-blind multicenter trial of adjunctive prednisolone and Mycobacterium w immunotherapy in tuberculous pericarditis. Am Heart J. 2013 Feb;165(2):109-15.e3. doi: 10.1016/j.ahj.2012.08.006. Epub 2012 Dec 13. PubMed PMID: 23351812.

480: Salahuddin N, Ali F, Hasan Z, Rao N, Ageel M, Mahmood F. Vitamin D accelerates clinical recovery from tuberculosis: results of the SUCCINCT Study [Supplementary Cholecalciferol in recovery from tuberculosis]. A randomized, placebo-controlled, clinical trial of vitamin D supplementation in patients with pulmonary tuberculosis'. BMC Infect Dis. 2013 Jan 19;13:22. doi: 10.1186/1471-2334-13-22. PubMed PMID: 23331510; PubMed Central PMCID: PMC3556334.

481: Hafkin J, Modongo C, Newcomb C, Lowenthal E, MacGregor RR, Steenhoff AP, Friedman H, Bisson GP. Impact of the human immunodeficiency virus on early multidrug-resistant tuberculosis treatment outcomes in Botswana. Int J Tuberc Lung Dis. 2013 Mar;17(3):348-53. doi: 10.5588/ijtld.12.0100. Epub 2013 Jan 14. PubMed PMID: 23321297; PubMed Central PMCID: PMC4393740.

482: Maciel EL, Brioschi AP, Peres RL, Guidoni LM, Ribeiro FK, Hadad DJ, Vinhas SA, Zandonade E, Palaci M, Dietze R, Johnson JL. Smoking and 2-month culture conversion during anti-tuberculosis treatment. Int J Tuberc Lung Dis. 2013 Feb;17(2):225-8. doi: 10.5588/ijtld.12.0426. PubMed PMID: 23317958; PubMed Central PMCID: PMC4497564.

483: BabalÄ±k A, CalÄ±Ä±r H, BakÄ±rcÄ± N, Arda H, KÄ±zÄ±ltaÄ± Åž, OruÅ§ K, Å±etintaÄ± G. The outcome of tuberculosis cases with persistent smear positivity at the end of extended initial phase. Tuberk Toraks. 2012;60(4):344-9. PubMed PMID: 23289464.

484: Chien JY, Chen YT, Shu CC, Lee JJ, Wang JY, Yu CJ, Yang PC. Outcome

correlation of smear-positivity for acid-fast bacilli at the fifth month of treatment in non-multidrug-resistant TB. Chest. 2013 Jun;143(6):1725-1732. doi: 10.1378/chest.12-2051. PubMed PMID: 23288018.

485: Kim S, Lee J, Lee J. Changes in chest CT findings of pulmonary tuberculosis after linezolid treatment. Springerplus. 2013 Nov 18;2:615. doi: 10.1186/2193-1801-2-615. eCollection 2013. PubMed PMID: 25674418; PubMed Central PMCID: PMC4320169.

486: Horita N, Miyazawa N, Yoshiyama T, Kojima R, Omori N, Inoue M, Kaneko T, Ishigatsubo Y. The presence of pretreatment cavitations and the bacterial load on smears predict tuberculosis infectivity negative conversion judged on sputum smear or culture. Intern Med. 2012;51(24):3367-72. Epub 2012 Dec 15. PubMed PMID: 23257521.

487: Jimenez-Corona ME, Cruz-Hervert LP, Garcia-Garcia L, Ferreyra-Reyes L, Delgado-Sanchez G, Bobadilla-Del-Valle M, Canizales-Quintero S, Ferreira-Guerrero E, Baez-Saldaña R, Tollez-Vázquez N, Montero-Campos R, Mongua-Rodriguez N, Martnez-Gamboa RA, Sifuentes-Osornio J, Ponce-de-León A. Association of diabetes and tuberculosis: impact on treatment and post-treatment outcomes. Thorax. 2013 Mar;68(3):214-20. doi: 10.1136/thoraxjnl-2012-201756. Epub 2012 Dec 18. PubMed PMID: 23250998; PubMed Central PMCID: PMC3585483.

488: Kimball AB, Kerdel F, Adams D, Mrowietz U, Gelfand JM, Gniadecki R, Prens EP, Schlessinger J, Zouboulis CC, van der Zee HH, Rosenfeld M, Mulani P, Gu Y, Paulson S, Okun M, Jemec GB. Adalimumab for the treatment of moderate to severe Hidradenitis suppurativa: a parallel randomized trial. Ann Intern Med. 2012 Dec 18;157(12):846-55. doi: 10.7326/0003-4819-157-12-201212180-00004. PubMed PMID: 23247938.

489: Weiss CH, Glassroth J. Pulmonary disease caused by nontuberculous

mycobacteria. *Expert Rev Respir Med*. 2012 Dec;6(6):597-612; quiz 613. doi: 10.1586/ers.12.58. Review. Erratum in: *Expert Rev Respir Med*. 2013 Apr;7(2):195-6. PubMed PMID: 23234447.

490: Hanrahan CF, Dorman SE, Erasmus L, Koornhof H, Coetzee G, Golub JE. The impact of expanded testing for multidrug resistant tuberculosis using genotype [correction of geontype] MTBDRplus in South Africa: an observational cohort study. *PLoS One*. 2012;7(11):e49898. doi: 10.1371/journal.pone.0049898. Epub 2012 Nov 30. Erratum in: *PLoS One*. 2013;8(6). doi: 10.1371/annotation/47420ec0-db00-4994-a0de-86b5e5d713f4. PubMed PMID: 23226229; PubMed Central PMCID: PMC3511489.

491: Janssen S, Padanilam X, Louw R, Mahanyele R, Coetzee G, HÅnscheid T, Leenstra T, Grobusch MP. How many sputum culture results do we need to monitor multidrug-resistant-tuberculosis (MDR-TB) patients during treatment? *J Clin Microbiol*. 2013 Feb;51(2):644-6. doi: 10.1128/JCM.02837-12. Epub 2012 Dec 5. PubMed PMID: 23224098; PubMed Central PMCID: PMC3553933.

492: Franke MF, Appleton SC, Mitnick CD, Furin JJ, Bayona J, Chalco K, Shin S, Murray M, Becerra MC. Aggressive regimens for multidrug-resistant tuberculosis reduce recurrence. *Clin Infect Dis*. 2013 Mar;56(6):770-6. doi: 10.1093/cid/cis1008. Epub 2012 Dec 7. PubMed PMID: 23223591; PubMed Central PMCID: PMC3582355.

493: Denkinger CM, Pai M, Patel M, Menzies D. Gamma interferon release assay for monitoring of treatment response for active tuberculosis: an explosion in the spaghetti factory. *J Clin Microbiol*. 2013 Feb;51(2):607-10. doi: 10.1128/JCM.02278-12. Epub 2012 Nov 21. PubMed PMID: 23175268; PubMed Central PMCID: PMC3553895.

494: Baumann R, Kaempfer S, Chegou NN, Nene NF, Veenstra H, Spallek R, Bolliger CT, Lukey PT, van Helden PD, Singh M, Walzl G. Serodiagnostic markers for the

prediction of the outcome of intensive phase tuberculosis therapy.  
Tuberculosis  
(Edinb). 2013 Mar;93(2):239-45. doi: 10.1016/j.tube.2012.09.003.  
Epub 2012 Nov 2.  
PubMed PMID: 23127778.

495: Lee J, Lee BJ, Yoon HI, Lee CT, Lee JH. Influence of previous tuberculosis treatment history on acid-fast bacilli smear and culture conversion. Int J Tuberc Lung Dis. 2012 Oct;16(10):1344-8. doi: 10.5588/ijtld.12.0113. PubMed PMID: 23107634.

496: Kurbatova EV, Gammino VM, Bayona J, Becerra MC, Danilovitz M, Falzon D, Gelmanova I, Keshavjee S, Leimane V, Mitnick CD, Quelapio MI, Riekstina V, Taylor A, Viiklepp P, Zignol M, Cegielski JP. Predictors of sputum culture conversion among patients treated for multidrug-resistant tuberculosis. Int J Tuberc Lung Dis. 2012 Oct;16(10):1335-43. doi: 10.5588/ijtld.11.0811. PubMed PMID: 23107633.

497: Ruslami R, Ganiem AR, Dian S, Apriani L, Achmad TH, van der Ven AJ, Borm G, Aarnoutse RE, van Crevel R. Intensified regimen containing rifampicin and moxifloxacin for tuberculous meningitis: an open-label, randomised controlled phase 2 trial. Lancet Infect Dis. 2013 Jan;13(1):27-35. doi: 10.1016/S1473-3099(12)70264-5. Epub 2012 Oct 25. PubMed PMID: 23103177.

498: Sanwalka N, Khadilkar A, Chiplonkar S, Khatod K, Phadke N, Khadilkar V. Vitamin D receptor gene polymorphisms and bone mass indices in post-menarchal Indian adolescent girls. J Bone Miner Metab. 2013 Jan;31(1):108-15. doi: 10.1007/s00774-012-0390-0. Epub 2012 Oct 19. PubMed PMID: 23081732.

499: Lee M, Lee J, Carroll MW, Choi H, Min S, Song T, Via LE, Goldfeder LC, Kang E, Jin B, Park H, Kwak H, Kim H, Jeon HS, Jeong I, Joh JS, Chen RY, Olivier KN, Shaw PA, Follmann D, Song SD, Lee JK, Lee D, Kim CT, Dartois V, Park SK, Cho SN, Barry CE 3rd. Linezolid for treatment of chronic extensively drug-resistant

tuberculosis. *N Engl J Med*. 2012 Oct 18;367(16):1508-18. doi: 10.1056/NEJMoal201964. PubMed PMID: 23075177; PubMed Central PMCID: PMC3814175.

500: Marx FM, Dunbar R, Enarson DA, Beyers N. The rate of sputum smear-positive tuberculosis after treatment default in a high-burden setting: a retrospective cohort study. *PLoS One*. 2012;7(9):e45724. doi: 10.1371/journal.pone.0045724. Epub 2012 Sep 25. Erratum in: *PLoS One*. 2013;8(8). doi: 10.1371/annotation/ea5f2a13-4394-41af-84c8-3e6af4a07770. PubMed PMID: 23049846; PubMed Central PMCID: PMC3458061.

501: Singh UB, Rana T, Kaushik A, Porwal C, Makkar N. Day zero quantitative mRNA analysis as a prognostic marker in pulmonary tuberculosis category II patients on treatment. *Clin Microbiol Infect*. 2012 Nov;18(11):E473-81. doi: 10.1111/j.1469-0691.2012.04004.x. Epub 2012 Sep 25. PubMed PMID: 23005345.

502: Rathored J, Sharma SK, Singh B, Banavaliker JN, Sreenivas V, Srivastava AK, Mohan A, Sachan A, Harinarayan CV, Goswami R. Risk and outcome of multidrug-resistant tuberculosis: vitamin D receptor polymorphisms and serum 25(OH)D. *Int J Tuberc Lung Dis*. 2012 Nov;16(11):1522-8. doi: 10.5588/ijtld.12.0122. Epub 2012 Sep 14. PubMed PMID: 22990231.

503: Coussens AK, Wilkinson RJ, Hanifa Y, Nikolayevskyy V, Elkington PT, Islam K, Timms PM, Venton TR, Bothamley GH, Packe GE, Darmalingam M, Davidson RN, Milburn HJ, Baker LV, Barker RD, Mein CA, Bhaw-Rosun L, Nuamah R, Young DB, Drobniewski FA, Griffiths CJ, Martineau AR. Vitamin D accelerates resolution of inflammatory responses during tuberculosis treatment. *Proc Natl Acad Sci U S A*. 2012 Sep 18;109(38):15449-54. Epub 2012 Sep 4. PubMed PMID: 22949664; PubMed Central PMCID: PMC3458393.

504: Naidoo K, Yende-Zuma N, Padayatchi N, Naidoo K, Jithoo N, Nair G, Bamber S, Gengiah S, El-Sadr WM, Friedland G, Abdool Karim S. The immune reconstitution inflammatory syndrome after antiretroviral therapy initiation in patients with

tuberculosis: findings from the SAPIt trial. *Ann Intern Med.* 2012 Sep 4;157(5):313-24. doi: 10.7326/0003-4819-157-5-201209040-00004. PubMed PMID: 22944873; PubMed Central PMCID: PMC3534856.

505: Kerstjens HA, Engel M, Dahl R, Paggiaro P, Beck E, Vandewalker M, Sigmund R, Seibold W, Moroni-Zentgraf P, Bateman ED. Tiotropium in asthma poorly controlled with standard combination therapy. *N Engl J Med.* 2012 Sep 27;367(13):1198-207. Epub 2012 Sep 2. PubMed PMID: 22938706.

506: Harada T, Akiyama Y, Kurashima A, Nagai H, Tsuyuguchi K, Fujii T, Yano S, Shigeto E, Kuraoka T, Kajiki A, Kobashi Y, Kokubu F, Sato A, Yoshida S, Iwamoto T, Saito H. Clinical and microbiological differences between *Mycobacterium abscessus* and *Mycobacterium massiliense* lung diseases. *J Clin Microbiol.* 2012 Nov;50(11):3556-61. doi: 10.1128/JCM.01175-12. Epub 2012 Aug 22. Erratum in: *J Clin Microbiol.* 2013 Feb;51(2):736. *J Clin Microbiol.* 2013 Mar;51(3):1061. PubMed PMID: 22915613; PubMed Central PMCID: PMC3486228.

507: Shneider BL, Magee JC, Bezerra JA, Haber B, Karpen SJ, Raghunathan T, Rosenthal P, Schwarz K, Suchy FJ, Kerkar N, Turmelle Y, Whittington PF, Robuck PR, Sokol RJ; Childhood Liver Disease Research Education Network (ChILDREN). Efficacy of fat-soluble vitamin supplementation in infants with biliary atresia. *Pediatrics.* 2012 Sep;130(3):e607-14. Epub 2012 Aug 13. PubMed PMID: 22891232; PubMed Central PMCID: PMC3428752.

508: Yang HZ, Wang K, Jin HZ, Gao TW, Xiao SX, Xu JH, Wang BX, Zhang FR, Li CY, Liu XM, Tu CX, Ji SZ, Shen Y, Zhu XJ. Infliximab monotherapy for Chinese patients with moderate to severe plaque psoriasis: a randomized, double-blind, placebo-controlled multicenter trial. *Chin Med J (Engl).* 2012 Jun;125(11):1845-51. PubMed PMID: 22884040.

509: van Vollenhoven RF, Fleischmann R, Cohen S, Lee EB, Garc a-Mejide JA,

Wagner S, Forejtova S, Zwillich SH, Gruben D, Koncz T, Wallenstein GV,  
Krishnaswami S, Bradley JD, Wilkinson B; ORAL Standard  
Investigators. Tofacitinib  
or adalimumab versus placebo in rheumatoid arthritis. *N Engl J Med.*  
2012 Aug  
9;367(6):508-19. doi: 10.1056/NEJMoa1112072. Erratum in: *N Engl J*  
*Med.* 2013 Jul  
18;369(3):293. PubMed PMID: 22873531.

510: Chang KC, Leung CC, Yew WW, Leung EC, Leung WM, Tam CM, Zhang Y.  
Pyrazinamide may improve fluoroquinolone-based treatment of  
multidrug-resistant  
tuberculosis. *Antimicrob Agents Chemother.* 2012 Nov;56(11):5465-75.  
doi:  
10.1128/AAC.01300-12. Epub 2012 Aug 6. PubMed PMID: 22869570; PubMed  
Central  
PMCID: PMC3486566.

511: Butov DA, Efremenko YV, Prihoda ND, Yurchenko LI, Sokolenko NI,  
Arjanova OV,  
Stepanenko AL, Butova TS, Zaitzeva SS, Jirathitikal V, Bourinbaiar  
AS, Kutsyna  
GA. Adjunct immune therapy of first-diagnosed TB, relapsed TB,  
treatment-failed  
TB, multidrug-resistant TB and TB/HIV. *Immunotherapy.* 2012  
Jul;4(7):687-95. doi:  
10.2217/imt.12.59. PubMed PMID: 22853755.

512: Demidik SN, Sukhanov DS. [Cycloferon in the complex therapy of  
patients with  
widespread forms of pulmonary tuberculosis]. *Eksp Klin Farmakol.*  
2012;75(5):17-20. Russian. PubMed PMID: 22834123.

513: Kumar SR, Gopalan N, Patrawalla P, Menon P, Mayer K,  
Swaminathan S. Immune  
reconstitution inflammatory syndrome in HIV-infected patients with  
and without  
prior tuberculosis. *Int J STD AIDS.* 2012 Jun;23(6):419-23. doi:  
10.1258/ijisa.2009.009439. PubMed PMID: 22807536; PubMed Central  
PMCID:  
PMC5592838.

514: Kayigamba FR, Bakker MI, Mugisha V, Gasana M, Schim van der  
Loeff MF. Sputum  
completion and conversion rates after intensive phase of  
tuberculosis treatment:  
an assessment of the Rwandan control program. *BMC Res Notes.* 2012  
Jul 16;5:357.

doi: 10.1186/1756-0500-5-357. PubMed PMID: 22800438; PubMed Central  
PMCID:  
PMC3413528.

515: Chakrabarti S, Saha I, Das DK, Prasad Sarkar A, Roy R, Hossain  
A.  
Comparative study of the profiles of tribal and non-tribal  
tuberculosis patients  
in a tuberculosis unit of West Bengal, India. Int J Tuberc Lung Dis.  
2012  
Sep;16(9):1205-9. doi: 10.5588/ijtld.11.0501. Epub 2012 Jul 12.  
PubMed PMID:  
22793518.

516: Hsia EC, Cush JJ, Matteson EL, Beutler A, Doyle MK, Hsu B, Xu  
S, Rahman MU.  
Comprehensive tuberculosis screening program in patients with  
inflammatory  
arthritides treated with golimumab, a human anti-tumor necrosis  
factor antibody,  
in Phase III clinical trials. Arthritis Care Res (Hoboken). 2013  
Feb;65(2):309-13. doi: 10.1002/acr.21788. PubMed PMID: 22782640.

517: Nagaraja C, Shashibhushan BL, Asif M, Manjunath PH, Sagar C.  
Pattern of  
drug-resistance and treatment outcome in multidrug-resistant  
pulmonary  
tuberculosis. Indian J Chest Dis Allied Sci. 2012 Jan-Mar;54(1):23-  
6. PubMed  
PMID: 22779119.

518: Ganmaa D, Giovannucci E, Bloom BR, Fawzi W, Burr W, Batbaatar  
D, Sumberzul  
N, Holick MF, Willett WC. Vitamin D, tuberculin skin test  
conversion, and latent  
tuberculosis in Mongolian school-age children: a randomized, double-  
blind,  
placebo-controlled feasibility trial. Am J Clin Nutr. 2012  
Aug;96(2):391-6. doi:  
10.3945/ajcn.112.034967. Epub 2012 Jul 3. PubMed PMID: 22760564;  
PubMed Central  
PMCID: PMC3396446.

519: Van Deun A, Maug AK, Hossain A, Gumusboga M, de Jong BC.  
Fluorescein  
diacetate vital staining allows earlier diagnosis of rifampicin-  
resistant  
tuberculosis. Int J Tuberc Lung Dis. 2012 Sep;16(9):1174-9. doi:  
10.5588/ijtld.11.0166. Epub 2012 Jun 28. PubMed PMID: 22747903.

520: Feng JY, Huang SF, Ting WY, Chen YC, Lin YY, Huang RM, Lin CH, Hwang JJ, Lee JJ, Yu MC, Yu KW, Lee YC, Su WJ. Gender differences in treatment outcomes of tuberculosis patients in Taiwan: a prospective observational study. Clin Microbiol Infect. 2012 Sep;18(9):E331-7. doi: 10.1111/j.1469-0691.2012.03931.x. Epub 2012 Jun 27. PubMed PMID: 22734962.

521: Meintjes G, Skolimowska KH, Wilkinson KA, Matthews K, Tadokera R, Conesa-Botella A, Seldon R, Rangaka MX, Rebe K, Pepper DJ, Morroni C, Colebunders R, Maartens G, Wilkinson RJ. Corticosteroid-modulated immune activation in the tuberculosis immune reconstitution inflammatory syndrome. Am J Respir Crit Care Med. 2012 Aug 15;186(4):369-77. doi: 10.1164/rccm.201201-0094OC. Epub 2012 Jun 14. PubMed PMID: 22700860; PubMed Central PMCID: PMC3443811.

522: Gler MT, Skripconoka V, Sanchez-Garavito E, Xiao H, Cabrera-Rivero JL, Vargas-Vasquez DE, Gao M, Awad M, Park SK, Shim TS, Suh GY, Danilovits M, Ogata H, Kurve A, Chang J, Suzuki K, Tupasi T, Koh WJ, Seaworth B, Geiter LJ, Wells CD. Delamanid for multidrug-resistant pulmonary tuberculosis. N Engl J Med. 2012 Jun 7;366(23):2151-60. doi: 10.1056/NEJMoal112433. PubMed PMID: 22670901.

523: Bhatt G, Vyas S, Trivedil K. An epidemiological study of multi drug resistant tuberculosis cases registered under Revised National Tuberculosis Control Programme of Ahmedabad City. Indian J Tuberc. 2012 Jan;59(1):18-27. PubMed PMID: 22670507.

524: Kakchapati S, Gyawali BN, Jha RK, Choonpradub C. Treatment outcome of multidrug-resistant Mycobacterium tuberculosis in Nepal. Asia Pac J Public Health. 2012 Jul;24(4):631-40. doi: 10.1177/1010539511408067. Epub 2012 May 31. PubMed PMID: 22652251.

525: Chaudhry LA, Essa EB, Al-Solaiman S, Al-Sindi K. Prevalence of diabetes

type-2 & pulmonary tuberculosis among Filipino and treatment outcomes: A surveillance study in the Eastern Saudi Arabia. *Int J Mycobacteriol.* 2012 Jun;1(2):106-9. doi: 10.1016/j.ijmyco.2012.03.002. Epub 2012 May 4. PubMed PMID: 26787066.

526: Chaudhry LA, Zamzami M, Aldin S, Pazdirek J. Clinical consequences of non-compliance with directly observed therapy short course (DOTS): Story of a recurrent defaulter. *Int J Mycobacteriol.* 2012 Jun;1(2):99-103. doi: 10.1016/j.ijmyco.2012.05.003. Epub 2012 Jun 21. PubMed PMID: 26787064.

527: Xu HB, Jiang RH, Li L, Xiao HP. Linezolid in the treatment of MDR-TB: a retrospective clinical study. *Int J Tuberc Lung Dis.* 2012;16(3):358-63. doi: 10.5588/ijtld.11.0493. PubMed PMID: 22640450.

528: Iddriss A, Padayatchi N, Reddy D, Reddi A. Pulmonary resection for extensively drug resistant tuberculosis in Kwazulu-Natal, South Africa. *Ann Thorac Surg.* 2012 Aug;94(2):381-6. doi: 10.1016/j.athoracsur.2012.03.072. Epub 2012 May 24. PubMed PMID: 22633500; PubMed Central PMCID: PMC3567439.

529: Theron G, Peter J, Lenders L, van Zyl-Smit R, Meldau R, Govender U, Dheda K. Correlation of mycobacterium tuberculosis specific and non-specific quantitative Th1 T-cell responses with bacillary load in a high burden setting. *PLoS One.* 2012;7(5):e37436. doi: 10.1371/journal.pone.0037436. Epub 2012 May 22. PubMed PMID: 22629395; PubMed Central PMCID: PMC3358317.

530: Chotirmall SH, Smith SG, Gunaratnam C, Cosgrove S, Dimitrov BD, O'Neill SJ, Harvey BJ, Greene CM, McElvaney NG. Effect of estrogen on pseudomonas mucoidy and exacerbations in cystic fibrosis. *N Engl J Med.* 2012 May 24;366(21):1978-86. doi: 10.1056/NEJMoal106126. Epub 2012 May 20. PubMed PMID: 22607135.

531: Riou C, Perez Peixoto B, Roberts L, Ronacher K, Walzl G, Manca C, Rustomjee R, Mthiyane T, Fallows D, Gray CM, Kaplan G. Effect of standard tuberculosis treatment on plasma cytokine levels in patients with active pulmonary tuberculosis. PLoS One. 2012;7(5):e36886. doi: 10.1371/journal.pone.0036886. Epub 2012 May 14. PubMed PMID: 22606304; PubMed Central PMCID: PMC3351475.

532: Manosuthi W, Mankatitham W, Lueangniyomkul A, Thongyen S, Likanonsakul S, Suwanvattana P, Thawornwan U, Suntisuklappon B, Nilkamhang S, Sungkanuparph S; TIME Study Team. Time to initiate antiretroviral therapy between 4 weeks and 12 weeks of tuberculosis treatment in HIV-infected patients: results from the TIME study. J Acquir Immune Defic Syndr. 2012 Aug 1;60(4):377-83. doi: 10.1097/QAI.0b013e31825b5e06. PubMed PMID: 22592586.

533: Sotgiu G, Centis R, D'Ambrosio L, Alffenaar JW, Anger HA, Caminero JA, Castiglia P, De Lorenzo S, Ferrara G, Koh WJ, Schechter GF, Shim TS, Singla R, Skrahina A, Spanevello A, Udwadia ZF, Villar M, Zampogna E, Zellweger JP, Zumla A, Migliori GB. Efficacy, safety and tolerability of linezolid containing regimens in treating MDR-TB and XDR-TB: systematic review and meta-analysis. Eur Respir J. 2012 Dec;40(6):1430-42. doi: 10.1183/09031936.00022912. Epub 2012 Apr 10. Review. PubMed PMID: 22496332.

534: Pasipanodya JG, Srivastava S, Gumbo T. Meta-analysis of clinical studies supports the pharmacokinetic variability hypothesis for acquired drug resistance and failure of antituberculosis therapy. Clin Infect Dis. 2012 Jul;55(2):169-77. doi: 10.1093/cid/cis353. Epub 2012 Mar 30. PubMed PMID: 22467670; PubMed Central PMCID: PMC3491771.

535: Gegia M, Kalandadze I, Kempker RR, Magee MJ, Blumberg HM. Adjunctive surgery improves treatment outcomes among patients with multidrug-resistant and extensively drug-resistant tuberculosis. Int J Infect Dis. 2012 May;16(5):e391-6.

doi: 10.1016/j.ijid.2011.12.018. Epub 2012 Mar 17. PubMed PMID: 22425494; PubMed Central PMCID: PMC3786004.

536: Didilescu C, Craiova UM. [Present and future in the use of anti-tubercular drugs]. *Pneumologia*. 2011 Oct-Dec;60(4):198-201. Romanian. PubMed PMID: 22420168.

537: Goodridge A, Cueva C, Lahiff M, Muzanye G, Johnson JL, Nahid P, Riley LW. Anti-phospholipid antibody levels as biomarker for monitoring tuberculosis treatment response. *Tuberculosis (Edinb)*. 2012 May;92(3):243-7. doi: 10.1016/j.tube.2012.02.004. Epub 2012 Mar 10. PubMed PMID: 22406155; PubMed Central PMCID: PMC4408545.

538: Efremenko YV, Arjanova OV, Prihoda ND, Yurchenko LV, Sokolenko NI, Mospan IV, Pylypchuk VS, Rowe J, Jirathitikal V, Bourinbaiar AS, Kutsyna GA. Clinical validation of sublingual formulations of Immunoxel (Dzherelo) as an adjuvant immunotherapy in treatment of TB patients. *Immunotherapy*. 2012 Mar;4(3):273-82. doi: 10.2217/imt.11.176. PubMed PMID: 22401633.

539: Diacon AH, Donald PR, Pym A, Grobusch M, Patientia RF, Mahanyele R, Bantubani N, Narasimooloo R, De Marez T, van Heeswijk R, Lounis N, Meyvisch P, Andries K, McNeeley DF. Randomized pilot trial of eight weeks of bedaquiline (TMC207) treatment for multidrug-resistant tuberculosis: long-term outcome, tolerability, and effect on emergence of drug resistance. *Antimicrob Agents Chemother*. 2012 Jun;56(6):3271-6. doi: 10.1128/AAC.06126-11. Epub 2012 Mar 5. PubMed PMID: 22391540; PubMed Central PMCID: PMC3370813.

540: Kim HS, Lee KS, Koh WJ, Jeon K, Lee EJ, Kang H, Ahn J. Serial CT findings of *Mycobacterium massiliense* pulmonary disease compared with *Mycobacterium abscessus* disease after treatment with antibiotic therapy. *Radiology*. 2012 Apr;263(1):260-70. doi: 10.1148/radiol.12111374. Epub 2012 Feb 27. PubMed PMID: 22371609.

541: Mordant P, Badia A, Le Pimpec-Barthes F, Riquet M. [Thoracic surgery in tuberculosis and non-tuberculous mycobacterial diseases]. Rev Pneumol Clin. 2012 Apr;68(2):77-83. doi: 10.1016/j.pneumo.2012.01.003. Epub 2012 Feb 22. Review. French. PubMed PMID: 22361064.

542: Kunawararak P, Pongpanich S, Chantawong S, Pokaew P, Traisathit P, Srithanaviboonchai K, Plipat T. Tuberculosis treatment with mobile-phone medication reminders in northern Thailand. Southeast Asian J Trop Med Public Health. 2011 Nov;42(6):1444-51. PubMed PMID: 22299414.

543: Gammino VM, Taylor AB, Rich ML, Bayona J, Becerra MC, Bonilla C, Gelmanova I, Hollo V, Jaramillo E, Keshavjee S, Leimane V, Mitnick CD, Quelapio MI, Riektsina V, Tupasi TE, Wells CD, Zignol M, Cegielski PJ. Bacteriologic monitoring of multidrug-resistant tuberculosis patients in five DOTS-Plus pilot projects. Int J Tuberc Lung Dis. 2011 Oct;15(10):1315-22. doi: 10.5588/ijtld.10.0221. PubMed PMID: 22283887.

544: Caetano Mota P, Carvalho A, Valente I, Braga R, Duarte R. Predictors of delayed sputum smear and culture conversion among a Portuguese population with pulmonary tuberculosis. Rev Port Pneumol. 2012 Mar-Apr;18(2):72-9. doi: 10.1016/j.rppneu.2011.12.005. Epub 2012 Jan 25. English, Portuguese. PubMed PMID: 22277838.

545: Okumura M, Yoshiyama T, Ogata H, Morimoto K, Kokuto H, Kurashima A, Kudoh S. [Factors related to the occurrence of multi- (extensively-) drug resistant tuberculosis (M/XDR-TB) in our hospital]. Kekkaku. 2011 Nov;86(11):863-8. Japanese. PubMed PMID: 22250465.

546: Visser ME, Stead MC, Walzl G, Warren R, Schomaker M, Grewal HM, Swart EC, Maartens G. Baseline predictors of sputum culture conversion in pulmonary

tuberculosis: importance of cavities, smoking, time to detection and W-Beijing genotype. PLoS One. 2012;7(1):e29588. doi: 10.1371/journal.pone.0029588. Epub 2012 Jan 4. PubMed PMID: 22238625; PubMed Central PMCID: PMC3251579.

547: Hsia EC, Schluger N, Cush JJ, Chaisson RE, Matteson EL, Xu S, Beutler A, Doyle MK, Hsu B, Rahman MU. Interferon- $\gamma$  release assay versus tuberculin skin test prior to treatment with golimumab, a human anti-tumor necrosis factor antibody, in patients with rheumatoid arthritis, psoriatic arthritis, or ankylosing spondylitis. Arthritis Rheum. 2012 Jul;64(7):2068-77. doi: 10.1002/art.34382. PubMed PMID: 22238071.

548: Ito Y, Hirai T, Maekawa K, Fujita K, Imai S, Tatsumi S, Handa T, Matsumoto H, Muro S, Niimi A, Mishima M. Predictors of 5-year mortality in pulmonary Mycobacterium avium-intracellulare complex disease. Int J Tuberc Lung Dis. 2012;16(3):408-14. doi: 10.5588/ijtld.11.0148. Epub 2012 Jan 5. PubMed PMID: 22230733.

549: Kim SH, Park C, Kwon EY, Shin NY, Kwon JC, Park SH, Choi SM, Lee DG, Choi JH, Yoo JH. Real-time nucleic acid sequence-based amplification to predict the clinical outcome of invasive aspergillosis. J Korean Med Sci. 2012 Jan;27(1):10-5. doi: 10.3346/jkms.2012.27.1.10. Epub 2011 Dec 19. PubMed PMID: 22219607; PubMed Central PMCID: PMC3247764.

550: Kobashi Y, Abe M, Mouri K, Obase Y, Kato S, Oka M. Relationship between clinical efficacy for pulmonary MAC and drug-sensitivity test for isolated MAC in a recent 6-year period. J Infect Chemother. 2012 Aug;18(4):436-43. doi: 10.1007/s10156-011-0351-x. Epub 2011 Dec 17. PubMed PMID: 22205543.

551: Xu HB, Jiang RH, Xiao HP. Clofazimine in the treatment of multidrug-resistant tuberculosis. Clin Microbiol Infect. 2012 Nov;18(11):1104-10. doi: 10.1111/j.1469-0691.2011.03716.x. Epub 2011 Dec 22. PubMed PMID: 22192631.

552: Tãrãk ME, Nguyen DB, Tran TH, Nguyen TB, Thwaites GE, Hoang TQ, Nguyen HD, Tran TH, Nguyen TC, Hoang HT, Wolbers M, Farrar JJ. Dexamethasone and long-term outcome of tuberculous meningitis in Vietnamese adults and adolescents. PLoS One. 2011;6(12):e27821. doi: 10.1371/journal.pone.0027821. Epub 2011 Dec 8. PubMed PMID: 22174748; PubMed Central PMCID: PMC3234244.

553: Arnedo-Pena A, Juan-Cerdã;n JV, Romeu-Garcia A, Garcia-Ferrer D, Holguã-n-Gã³mez R, Iborra-Millet J, Herrero-Carot C, Piãtana MJ, Bellido-Blasco J, Ferrero-Vega JA, Adsuara LS, Silvestre ES, Ferrer NM, Bartual VR. Latent tuberculosis infection, tuberculin skin test and vitamin D status in contacts of tuberculosis patients: a cross-sectional and case-control study. BMC Infect Dis. 2011 Dec 15;11:349. doi: 10.1186/1471-2334-11-349. PubMed PMID: 22171844; PubMed Central PMCID: PMC3292546.

554: Hyams J, Damaraju L, Blank M, Johanns J, Guzzo C, Winter HS, Kugathasan S, Cohen S, Markowitz J, Escher JC, Veereman-Wauters G, Crandall W, Baldassano R, Griffiths A; T72 Study Group. Induction and maintenance therapy with infliximab for children with moderate to severe ulcerative colitis. Clin Gastroenterol Hepatol. 2012 Apr;10(4):391-9.e1. doi: 10.1016/j.cgh.2011.11.026. Epub 2011 Dec 8. PubMed PMID: 22155755.

555: Tangg SJ, Zhang Q, Zheng LH, Sun H, Gu J, Hao XH, Liu YD, Yao L, Xiao HP. Efficacy and safety of linezolid in the treatment of extensively drug-resistant tuberculosis. Jpn J Infect Dis. 2011;64(6):509-12. PubMed PMID: 22116331.

556: Kunogi M, Kawabe Y, Suzuki J, Shimada M, Kaneko Y, Matsui Y, Kawashima M, Ohshima N, Ariga H, Masuda K, Matsui H, Tamura A, Nagai H, Akagawa S, Nagayama N, Toyota E, Machida K, Nakajima Y. [Evaluation of tuberculosis treatment including levofloxacin (LVFX) in cases who could not continue standard regimen]. Kekkaku.

2011 Sep;86(9):773-9. Japanese. PubMed PMID: 22111385.

557: Bucci FA Jr, Waterbury LD. Prostaglandin E2 inhibition of ketorolac 0.45%, bromfenac 0.09%, and nepafenac 0.1% in patients undergoing phacoemulsification. Adv Ther. 2011 Dec;28(12):1089-95. doi: 10.1007/s12325-011-0080-7. Epub 2011 Nov 18. PubMed PMID: 22105509.

558: Radovic M, Ristic L, Stankovic I, Pejicic T, Rancic M, Ciric Z, Dinic-Radovic V. Chronic airflow obstruction syndrome due to pulmonary tuberculosis treated with directly observed therapy--a serious changes in lung function. Med Arh. 2011;65(5):265-9. PubMed PMID: 22073848.

559: Shiobara Y, Goto H, Hoshino M, Tsukahara T, Yamaguchi N, Ito M, Nozawa A, Tsukiji J, Ishigatsubo Y, Kaneko T. [Two cases of juvenile-onset and adult-onset recurrent respiratory papillomatosis]. Nihon Kokyuki Gakkai Zasshi. 2011 Sep;49(9):667-73. Japanese. PubMed PMID: 22073613.

560: Tao Y, Kitasato Y, Kawasaki M, Oe T, Kitahara Y, Kawakami K, Takikawa S, Miyagi S, Yamanaka T, Toshihiko I, Kawabata M. [Clinical investigation of multidrug-resistant tuberculosis --investigation of inpatients in the Kyushu region between 2004 and 2009]. Kekkaku. 2011 Aug;86(8):751-5. Japanese. PubMed PMID: 22073593.

561: Seddon JA, Hesselring AC, Willemsse M, Donald PR, Schaaf HS. Culture-confirmed multidrug-resistant tuberculosis in children: clinical features, treatment, and outcome. Clin Infect Dis. 2012 Jan 15;54(2):157-66. doi: 10.1093/cid/cir772. Epub 2011 Nov 3. PubMed PMID: 22052896.

562: Singla N, Gupta D, Joshi A, Batra N, Singh J, Birbian N. Association of mannose-binding lectin gene polymorphism with tuberculosis susceptibility and sputum conversion time. Int J Immunogenet. 2012 Feb;39(1):10-4. doi:

10.1111/j.1744-313X.2011.01047.x. Epub 2011 Nov 3. PubMed PMID: 22050925.

563: Park SW, Shin JW, Kim JY, Park IW, Choi BW, Choi JC, Kim YS. The effect of diabetic control status on the clinical features of pulmonary tuberculosis. *Eur J Clin Microbiol Infect Dis*. 2012 Jul;31(7):1305-10. doi: 10.1007/s10096-011-1443-3. Epub 2011 Oct 25. PubMed PMID: 22042559.

564: Oliveira HB, Mateus SH. [Characterization of multidrug-resistant tuberculosis during pregnancy in Campinas, State of São Paulo, Brazil, from 1995 to 2007]. *Rev Soc Bras Med Trop*. 2011 Oct;44(5):627-30. Portuguese. PubMed PMID: 22031080.

565: Christopher DJ, James P, Daley P, Armstrong L, Isaac BT, Thangakunam B, Premkumar B, Zwerling A, Pai M. High annual risk of tuberculosis infection among nursing students in South India: a cohort study. *PLoS One*. 2011;6(10):e26199. doi: 10.1371/journal.pone.0026199. Epub 2011 Oct 12. PubMed PMID: 22022565; PubMed Central PMCID: PMC3192164.

566: Abdool Karim SS, Naidoo K, Grobler A, Padayatchi N, Baxter C, Gray AL, Gengiah T, Gengiah S, Naidoo A, Jithoo N, Nair G, El-Sadr WM, Friedland G, Abdool Karim Q. Integration of antiretroviral therapy with tuberculosis treatment. *N Engl J Med*. 2011 Oct 20;365(16):1492-501. doi: 10.1056/NEJMoa1014181. PubMed PMID: 22010915; PubMed Central PMCID: PMC3233684.

567: Havlir DV, Kendall MA, Ive P, Kumwenda J, Swindells S, Qasba SS, Luetkemeyer AF, Hogg E, Rooney JF, Wu X, Hosseinipour MC, Lalloo U, Veloso VG, Some FF, Kumarasamy N, Padayatchi N, Santos BR, Reid S, Hakim J, Mohapi L, Mugenyi P, Sanchez J, Lama JR, Pape JW, Sanchez A, Asmelash A, Moko E, Sawe F, Andersen J, Sanne I; AIDS Clinical Trials Group Study A5221. Timing of antiretroviral therapy for HIV-1 infection and tuberculosis. *N Engl J Med*. 2011 Oct 20;365(16):1482-91.

doi: 10.1056/NEJMoal013607. PubMed PMID: 22010914; PubMed Central  
PMCID:  
PMC3327101.

568: Blanc FX, Sok T, Laureillard D, Borand L, Rekacewicz C,  
Nerrienet E, Madec  
Y, Marcy O, Chan S, Prak N, Kim C, Lak KK, Hak C, Dim B, Sin CI, Sun  
S, Guillard  
B, Sar B, Vong S, Fernandez M, Fox L, Delfraissy JF, Goldfeld AE;  
CAMELIA (ANRS  
1295â€CIPRA KH001) Study Team. Earlier versus later start of  
antiretroviral  
therapy in HIV-infected adults with tuberculosis. N Engl J Med. 2011  
Oct  
20;365(16):1471-81. doi: 10.1056/NEJMoal013911. PubMed PMID:  
22010913; PubMed  
Central PMCID: PMC4879711.

569: Qazi F, Khan U, Khowaja S, Javaid M, Ahmed A, Salahuddin N,  
Hussain H,  
Becerra MC, Golub JE, Khan AJ. Predictors of delayed culture  
conversion in  
patients treated for multidrug-resistant tuberculosis in Pakistan.  
Int J Tuberc  
Lung Dis. 2011 Nov;15(11):1556-9, i. doi: 10.5588/ijtld.10.0679.  
PubMed PMID:  
22008773; PubMed Central PMCID: PMC6203961.

570: Kurbatova EV, Gammino VM, Bayona J, Becerra M, Danilovitz M,  
Falzon D,  
Gelmanova I, Keshavjee S, Leimane V, Mitnick CD, Quelapio MI,  
Riekstina V, Taylor  
A, Viiklepp P, Zignol M, Cegielski JP. Frequency and type of  
microbiological  
monitoring of multidrug-resistant tuberculosis treatment. Int J  
Tuberc Lung Dis.  
2011 Nov;15(11):1553-5, i. doi: 10.5588/ijtld.11.0101. PubMed PMID:  
22008772.

571: Skenders GK, Holtz TH, Riekstina V, Leimane V. Implementation  
of the  
INNO-LiPA Rif. TBâ€R line-probe assay in rapid detection of  
multidrug-resistant  
tuberculosis in Latvia. Int J Tuberc Lung Dis. 2011 Nov;15(11):1546-  
52, i. doi:  
10.5588/ijtld.11.0067. PubMed PMID: 22008771.

572: Bucci FA Jr, Waterbury LD. A randomized comparison of to-  
aqueous penetration  
of ketorolac 0.45%, bromfenac 0.09% and nepafenac 0.1% in cataract  
patients

undergoing phacoemulsification. *Curr Med Res Opin.* 2011 Dec;27(12):2235-9. doi: 10.1185/03007995.2011.626018. Epub 2011 Oct 12. PubMed PMID: 21992076.

573: Mukhopadhyay S, Sarkar AP. Comparative Analysis of RNTCP Indicators in a Rural and an Urban Tuberculosis Unit of Burdwan District in West Bengal. *Indian J Community Med.* 2011 Apr;36(2):146-9. doi: 10.4103/0970-0218.84136. PubMed PMID: 21976802; PubMed Central PMCID: PMC3180942.

574: Jung KS, Park HY, Park SY, Kim SK, Kim YK, Shim JJ, Moon HS, Lee KH, Yoo JH, Lee SD; Korean Academy of Tuberculosis and Respiratory Diseases study group; Korea Chronic Obstructive Pulmonary Disease study group. Comparison of tiotropium plus fluticasone propionate/salmeterol with tiotropium in COPD: a randomized controlled study. *Respir Med.* 2012 Mar;106(3):382-9. doi: 10.1016/j.rmed.2011.09.004. Epub 2011 Oct 4. PubMed PMID: 21975275.

575: Singla R, Caminero JA, Jaiswal A, Singla N, Gupta S, Bali RK, Behera D. Linezolid: an effective, safe and cheap drug for patients failing multidrug-resistant tuberculosis treatment in India. *Eur Respir J.* 2012 Apr;39(4):956-62. doi: 10.1183/09031936.00076811. Epub 2011 Sep 29. PubMed PMID: 21965225.

576: Vadwai V, Daver G, Udwadia Z, Sadani M, Shetty A, Rodrigues C. Clonal population of *Mycobacterium tuberculosis* strains reside within multiple lung cavities. *PLoS One.* 2011;6(9):e24770. doi: 10.1371/journal.pone.0024770. Epub 2011 Sep 14. PubMed PMID: 21935462; PubMed Central PMCID: PMC3173478.

577: Luzzati R, Confalonieri M, Cazzadori A, Della Loggia P, Cifaldi R, Fabris C, Biolo M, Borelli M, Longo C, Concia E. Prolonged hospitalisation for immigrants and high risk patients with positive smear pulmonary tuberculosis. *Monaldi Arch Chest Dis.* 2011 Jun;75(2):141-5. PubMed PMID: 21932701.

578: Lebwohl M, Leonardi C, Griffiths CE, Prinz JC, Szapary PO, Yeilding N, Guzzo C, Li S, Hsu MC, Strober B. Long-term safety experience of ustekinumab in patients with moderate-to-severe psoriasis (Part I of II): results from analyses of general safety parameters from pooled Phase 2 and 3 clinical trials. *J Am Acad Dermatol*. 2012 May;66(5):731-41. doi: 10.1016/j.jaad.2011.06.011. Epub 2011 Sep 17. PubMed PMID: 21930328.

579: Yang XY, Chen QF, Li YP, Wu SM. Mycobacterium vaccae as adjuvant therapy to anti-tuberculosis chemotherapy in never-treated tuberculosis patients: a meta-analysis. *PLoS One*. 2011;6(9):e23826. doi: 10.1371/journal.pone.0023826. Epub 2011 Sep 6. PubMed PMID: 21909406; PubMed Central PMCID: PMC3167806.

580: Chen YC, Chin CH, Liu SF, Wu CC, Tsen CC, Wang YH, Chao TY, Lie CH, Chen CJ, Wang CC, Lin MC. Prognostic values of serum IP-10 and IL-17 in patients with pulmonary tuberculosis. *Dis Markers*. 2011;31(2):101-10. doi: 10.3233/DMA-2011-0808. PubMed PMID: 21897004; PubMed Central PMCID: PMC3826581.

581: SchÅ¶n T, Idh J, Westman A, Elias D, Abate E, Diro E, Moges F, Kassu A, Ayele B, Forslund T, Getachew A, Britton S, Stendahl O, Sundqvist T. Effects of a food supplement rich in arginine in patients with smear positive pulmonary tuberculosis--a randomised trial. *Tuberculosis (Edinb)*. 2011 Sep;91(5):370-7. doi: 10.1016/j.tube.2011.06.002. Epub 2011 Aug 2. PubMed PMID: 21813328.

582: Liesker JJ, Bathoorn E, Postma DS, Vonk JM, Timens W, Kerstjens HA. Sputum inflammation predicts exacerbations after cessation of inhaled corticosteroids in COPD. *Respir Med*. 2011 Dec;105(12):1853-60. doi: 10.1016/j.rmed.2011.07.002. Epub 2011 Jul 29. PubMed PMID: 21802933.

583: Gler MT, Macalintal LE, Raymond L, Guilatco R, Quelapio MI, Tupasi TE.

Multidrug-resistant tuberculosis among previously treated patients in the Philippines. *Int J Tuberc Lung Dis.* 2011 May;15(5):652-6. doi: 10.5588/ijtld.10.0400. PubMed PMID: 21756517.

584: Ozsahin SL, Arslan S, Epozturk K, Remziye E, Dogan OT. Chest X-ray and bacteriology in the initial phase of treatment of 800 male patients with pulmonary tuberculosis. *J Bras Pneumol.* 2011 May-Jun;37(3):294-301. English, Portuguese. PubMed PMID: 21755183.

585: Koh WJ, Choi GE, Lee SH, Park YK, Lee NY, Shin SJ. First case of *Segniliparus rotundus* pneumonia in a patient with bronchiectasis. *J Clin Microbiol.* 2011 Sep;49(9):3403-5. doi: 10.1128/JCM.01023-11. Epub 2011 Jul 13. PubMed PMID: 21752969; PubMed Central PMCID: PMC3165615.

586: Baker MA, Harries AD, Jeon CY, Hart JE, Kapur A, Linnroth K, Ottmani SE, Goonesekera SD, Murray MB. The impact of diabetes on tuberculosis treatment outcomes: a systematic review. *BMC Med.* 2011 Jul 1;9:81. doi: 10.1186/1741-7015-9-81. PubMed PMID: 21722362; PubMed Central PMCID: PMC3155828.

587: Gao XF, Yang ZW, Li J. Adjunctive therapy with interferon-gamma for the treatment of pulmonary tuberculosis: a systematic review. *Int J Infect Dis.* 2011 Sep;15(9):e594-600. doi: 10.1016/j.ijid.2011.05.002. Epub 2011 Jun 28. Review. PubMed PMID: 21715206.

588: Yehia MM, Abdulla ZA. Isolation of *Histoplasma capsulatum* and *Blastomyces dermatitidis* from Iraqi Patients with Lower Respiratory Tract Infections. *J IMA.* 2011 Jul;43(2):68-73. doi: 10.5915/43-2-5929. PubMed PMID: 23610487; PubMed Central PMCID: PMC3516054.

589: Chigutsa E, Visser ME, Swart EC, Denti P, Pushpakom S, Egan D, Holford NH, Smith PJ, Maartens G, Owen A, McIlleron H. The *SLCO1B1* rs4149032 polymorphism is

highly prevalent in South Africans and is associated with reduced rifampin concentrations: dosing implications. *Antimicrob Agents Chemother.* 2011 Sep;55(9):4122-7. doi: 10.1128/AAC.01833-10. Epub 2011 Jun 27. PubMed PMID: 21709081; PubMed Central PMCID: PMC3165308.

590: Bai L, Hong Z, Gong C, Yan D, Liang Z. Surgical treatment efficacy in 172 cases of tuberculosis-destroyed lungs. *Eur J Cardiothorac Surg.* 2012 Feb;41(2):335-40. doi: 10.1016/j.ejcts.2011.05.028. Epub 2011 Dec 12. PubMed PMID: 21684172.

591: Schoeman JF, Janse van Rensburg A, Laubscher JA, Springer P. The role of aspirin in childhood tuberculous meningitis. *J Child Neurol.* 2011 Aug;26(8):956-62. doi: 10.1177/0883073811398132. Epub 2011 May 31. PubMed PMID: 21628697.

592: Joseph P, Desai VB, Mohan NS, Fredrick JS, Ramachandran R, Raman B, Wares F, Ramachandran R, Thomas A. Outcome of standardized treatment for patients with MDR-TB from Tamil Nadu, India. *Indian J Med Res.* 2011 May;133:529-34. PubMed PMID: 21623039; PubMed Central PMCID: PMC3121285.

593: Sha W, Liang L, Jiang RH, Fang Y, Yin HY, Xiao HP. [The effect of the regimen containing cefoxitin on highly drug-resistant rapidly growing nontuberculous mycobacterial pulmonary disease]. *Zhonghua Jie He He Hu Xi Za Zhi.* 2011 Apr;34(4):265-8. Chinese. PubMed PMID: 21609609.

594: Phua CK, Chee CB, Chua AP, Gan SH, Ahmed AD, Wang YT. Managing a case of extensively drug-resistant (XDR) pulmonary tuberculosis in Singapore. *Ann Acad Med Singapore.* 2011 Mar;40(3):132-5. PubMed PMID: 21603731.

595: Tãŕrãŕk ME, Yen NT, Chau TT, Mai NT, Phu NH, Mai PP, Dung NT, Chau NV, Bang ND, Tien NA, Minh NH, Hien NQ, Thai PV, Dong DT, Anh DT, Thoa NT, Hai NN, Lan NN, Lan NT, Quy HT, Dung NH, Hien TT, Chinh NT, Simmons CP, de Jong M, Wolbers M,

Farrar JJ. Timing of initiation of antiretroviral therapy in human immunodeficiency virus (HIV)--associated tuberculous meningitis. Clin Infect Dis. 2011 Jun;52(11):1374-83. doi: 10.1093/cid/cir230. PubMed PMID: 21596680; PubMed Central PMCID: PMC4340579.

596: Pratt RH, Winston CA, Kammerer JS, Armstrong LR. Tuberculosis in older adults in the United States, 1993-2008. J Am Geriatr Soc. 2011 May;59(5):851-7. doi: 10.1111/j.1532-5415.2011.03369.x. Epub 2011 Apr 21. PubMed PMID: 21517786.

597: Mac Kenzie WR, Heilig CM, Bozeman L, Johnson JL, Muzanye G, Dunbar D, Jost KC Jr, Diem L, Metchock B, Eisenach K, Dorman S, Goldberg S. Geographic differences in time to culture conversion in liquid media: Tuberculosis Trials Consortium study 28. Culture conversion is delayed in Africa. PLoS One. 2011 Apr 11;6(4):e18358. doi: 10.1371/journal.pone.0018358. PubMed PMID: 21494548; PubMed Central PMCID: PMC3073969.

598: Kota SK, Jammula S, Kota SK, Tripathy PR, Panda S, Modi KD. Effect of vitamin D supplementation in type 2 diabetes patients with pulmonary tuberculosis. Diabetes Metab Syndr. 2011 Apr-Jun;5(2):85-9. doi: 10.1016/j.dsx.2012.02.021. Epub 2012 Mar 15. PubMed PMID: 22813409.

599: RadoviÄ‡ M, RistiÄ‡ L, StankoviÄ‡ I, PetroviÄ‡ D. [Rare congenital heart disease as a cause of tuberculosis activation]. Med Pregl. 2010 Jul-Aug;63(7-8):565-9. Serbian. PubMed PMID: 21446150.

600: Selvaraj P. Vitamin D, vitamin D receptor, and cathelicidin in the treatment of tuberculosis. Vitam Horm. 2011;86:307-25. doi: 10.1016/B978-0-12-386960-9.00013-7. Review. PubMed PMID: 21419277.

601: Klareskog L, Gaubitz M, RodrÃ­guez-Valverde V, Malaise M, Dougados M, Wajdula J; Etanercept Study 301 Investigators. Assessment of long-term safety and efficacy of etanercept in a 5-year extension study in patients with rheumatoid

arthritis. Clin Exp Rheumatol. 2011 Mar-Apr;29(2):238-47. Epub 2011 Apr 19.  
PubMed PMID: 21418785.

602: Monedero I, Caminero JA. Evidence for promoting fixed-dose combination drugs in tuberculosis treatment and control: a review. Int J Tuberc Lung Dis. 2011 Apr;15(4):433-9. doi: 10.5588/ijtld.09.0439. Review. PubMed PMID: 21396199.

603: Greenwald MW, Shergy WJ, Kaine JL, Sweetser MT, Gilder K, Linnik MD. Evaluation of the safety of rituximab in combination with a tumor necrosis factor inhibitor and methotrexate in patients with active rheumatoid arthritis: results from a randomized controlled trial. Arthritis Rheum. 2011 Mar;63(3):622-32. doi: 10.1002/art.30194. PubMed PMID: 21360491.

604: Steingart KR, Jotblad S, Robsky K, Deck D, Hopewell PC, Huang D, Nahid P. Higher-dose rifampin for the treatment of pulmonary tuberculosis: a systematic review. Int J Tuberc Lung Dis. 2011 Mar;15(3):305-16. Review. PubMed PMID: 21333096.

605: Wateba MI, Diop SA, Salou M, Womitso K, Nichols S, Tidjani O. [Sputum smear conversion during intensive TB treatment phase according to HIV status, in hospitalised patients in Togo]. Med Mal Infect. 2011 Mar;41(3):140-4. doi: 10.1016/j.medmal.2010.12.011. Epub 2011 Feb 1. French. PubMed PMID: 21282024.

606: Atkins S, Lewin S, Jordaan E, Thorson A. Lay health worker-supported tuberculosis treatment adherence in South Africa: an interrupted time-series study. Int J Tuberc Lung Dis. 2011 Jan;15(1):84-9, i. PubMed PMID: 21276302.

607: Dharmadhikari AS, Nardell E. Serial acid fast bacilli smear and culture conversion rates over 26 weeks in a cohort of 93 sputum culture-â€positive tuberculosis (TB). Clin Infect Dis. 2011 Feb 15;52(4):554-6. doi:

10.1093/cid/ciq182. Erratum in: Clin Infect Dis. 2012 Nov  
15;55(10):1439. PubMed  
PMID: 21258108; PubMed Central PMCID: PMC3060903.

608: Brust JC, Lygizos M, Chaiyachati K, Scott M, van der Merwe TL,  
Moll AP, Li  
X, Loveday M, Bamber SA, Lalloo UG, Friedland GH, Shah NS, Gandhi  
NR. Culture  
conversion among HIV co-infected multidrug-resistant tuberculosis  
patients in  
Tugela Ferry, South Africa. PLoS One. 2011 Jan 6;6(1):e15841. doi:  
10.1371/journal.pone.0015841. PubMed PMID: 21253585; PubMed Central  
PMCID:  
PMC3017058.

609: Butov DA, Pashkov YN, Stepanenko AL, Choporova AI, Butova TS,  
Batdelger D,  
Jirathitikal V, Bourinbaiar AS, Zaitzeva SI. Phase IIb randomized  
trial of  
adjunct immunotherapy in patients with first-diagnosed tuberculosis,  
relapsed and  
multi-drug-resistant (MDR) TB. J Immune Based Ther Vaccines. 2011  
Jan 18;9:3.  
doi: 10.1186/1476-8518-9-3. PubMed PMID: 21244690; PubMed Central  
PMCID:  
PMC3031205.

610: Chappell GP, Xiao X, Pica-Mendez A, Varnell T, Green S, Tanaka  
WK, Laterza  
O. Quantitative measurement of cysteinyl leukotrienes and  
leukotriene Bâ,, in human  
sputum using ultra high pressure liquid chromatography-tandem mass  
spectrometry.  
J Chromatogr B Analyt Technol Biomed Life Sci. 2011 Feb 1;879(3-  
4):277-84. doi:  
10.1016/j.jchromb.2010.12.014. Epub 2010 Dec 23. PubMed PMID:  
21227760.

611: Biere SS, Maas KW, Bonavina L, Garcia JR, van Berge Henegouwen  
MI, Rosman C,  
Sosef MN, de Lange ES, Bonjer HJ, Cuesta MA, van der Peet DL.  
Traditional  
invasive vs. minimally invasive esophagectomy: a multi-center,  
randomized trial  
(TIME-trial). BMC Surg. 2011 Jan 12;11:2. doi: 10.1186/1471-2482-11-  
2. PubMed  
PMID: 21226918; PubMed Central PMCID: PMC3031195.

612: Jahnavi G, Sudha CH. Randomised controlled trial of food  
supplements in

patients with newly diagnosed tuberculosis and wasting. Singapore Med J. 2010 Dec;51(12):957-62. PubMed PMID: 21221502.

613: Rasmussen TA, SÅ,gaard OS, Camara C, Andersen PL, Wejse C. Serum procalcitonin in pulmonary tuberculosis. Int J Tuberc Lung Dis. 2011 Feb;15(2):251-6, i. PubMed PMID: 21219690.

614: Martineau AR, Timms PM, Bothamley GH, Hanifa Y, Islam K, Claxton AP, Packe GE, Moore-Gillon JC, Darmalingam M, Davidson RN, Milburn HJ, Baker LV, Barker RD, Woodward NJ, Venton TR, Barnes KE, Mullett CJ, Coussens AK, Rutterford CM, Mein CA, Davies GR, Wilkinson RJ, Nikolayevskyy V, Drobniewski FA, Eldridge SM, Griffiths CJ. High-dose vitamin D(3) during intensive-phase antimicrobial treatment of pulmonary tuberculosis: a double-blind randomised controlled trial. Lancet. 2011 Jan 15;377(9761):242-50. doi: 10.1016/S0140-6736(10)61889-2. Epub 2011 Jan 5. PubMed PMID: 21215445; PubMed Central PMCID: PMC4176755.

615: Reinisch W, Sandborn WJ, Hommes DW, D'Haens G, Hanauer S, Schreiber S, Panaccione R, Fedorak RN, Tighe MB, Huang B, Kampman W, Lazar A, Thakkar R. Adalimumab for induction of clinical remission in moderately to severely active ulcerative colitis: results of a randomised controlled trial. Gut. 2011 Jun;60(6):780-7. doi: 10.1136/gut.2010.221127. Epub 2011 Jan 5. PubMed PMID: 21209123.

616: Joseph N, Nagaraj K, Bhat J, Babu R, Kotian S, Ranganatha Y, Hocksan A, Shetty V, Zaki N, Swasthik K, Hamzah N. Treatment outcomes among new smear positive and retreatment cases of tuberculosis in Mangalore, South India - a descriptive study. Australas Med J. 2011;4(4):162-7. doi: 10.4066/AMJ.2011.585. Epub 2011 Apr 30. PubMed PMID: 23393507; PubMed Central PMCID: PMC3562894.

617: Siddiqui UA, O'Toole M, Kabir Z, Qureshi S, Gibbons N, Kane M, Keane J.

Smoking prolongs the infectivity of patients with tuberculosis. Ir Med J. 2010 Oct;103(9):278-80. PubMed PMID: 21186753.

618: Feurle GE, Moos V, Schinnerling K, Geelhaar A, Allers K, Biagi F, Bläcker H, Moter A, Loddenkemper C, Jansen A, Schneider T. The immune reconstitution inflammatory syndrome in whipple disease: a cohort study. Ann Intern Med. 2010 Dec 7;153(11):710-7. doi: 10.7326/0003-4819-153-11-201012070-00004. PubMed PMID: 21135294.

619: Kobashi Y, Abe M, Mouri K, Obase Y, Miyashita N, Oka M. Clinical usefulness of combination chemotherapy for pulmonary Mycobacterium avium complex disease. J Infect. 2010 Nov 19. [Epub ahead of print] PubMed PMID: 21094662.

620: Visser ME, Grewal HM, Swart EC, Dhansay MA, Walzl G, Swanevelder S, Lombard C, Maartens G. The effect of vitamin A and zinc supplementation on treatment outcomes in pulmonary tuberculosis: a randomized controlled trial. Am J Clin Nutr. 2011 Jan;93(1):93-100. doi: 10.3945/ajcn.110.001784. Epub 2010 Nov 10. PubMed PMID: 21068353.

621: Okumura M, Yoshiyama T, Maeda S, Kazumi Y, Azuma Y, Ueyama M, Morimoto K, Kurashima A, Ogata H, Kudoh S. [Clinical analysis of extensively-drug resistant tuberculosis (XDR-TB) in our hospital]. Kekkaku. 2010 Oct;85(10):737-42. Japanese. PubMed PMID: 21061563.

622: Lawson L, Thacher TD, Yassin MA, Onuoha NA, Usman A, Emenyonu NE, Shenkin A, Davies PD, Cuevas LE. Randomized controlled trial of zinc and vitamin A as co-adjuvants for the treatment of pulmonary tuberculosis. Trop Med Int Health. 2010 Dec;15(12):1481-90. doi: 10.1111/j.1365-3156.2010.02638.x. Epub 2010 Oct 19. PubMed PMID: 20958890.

623: Pardeshi GS. Time of default in tuberculosis patients on directly observed

treatment. *J Glob Infect Dis.* 2010 Sep;2(3):226-30. doi: 10.4103/0974-777X.68533.  
PubMed PMID: 20927282; PubMed Central PMCID: PMC2946677.

624: Maneechotesuwan K, Ekjiratrakul W, Kasetsinsombat K, Wongkajornsilp A, Barnes PJ. Statins enhance the anti-inflammatory effects of inhaled corticosteroids in asthmatic patients through increased induction of indoleamine 2, 3-dioxygenase. *J Allergy Clin Immunol.* 2010 Oct;126(4):754-762.e1. doi: 10.1016/j.jaci.2010.08.005. PubMed PMID: 20920765.

625: Pakasi TA, Karyadi E, Suratih NM, Salean M, Darmawidjaja N, Bor H, van der Velden K, Dolmans WM, van der Meer JW. Zinc and vitamin A supplementation fails to reduce sputum conversion time in severely malnourished pulmonary tuberculosis patients in Indonesia. *Nutr J.* 2010 Sep 28;9:41. doi: 10.1186/1475-2891-9-41. PubMed PMID: 20920186; PubMed Central PMCID: PMC2957385.

626: Jeremiah K, Praygod G, Faurholt-Jepsen D, Range N, Andersen AB, Grewal HM, Friis H. BCG vaccination status may predict sputum conversion in patients with pulmonary tuberculosis: a new consideration for an old vaccine? *Thorax.* 2010 Dec;65(12):1072-6. doi: 10.1136/thx.2010.134767. Epub 2010 Oct 1. PubMed PMID: 20889521.

627: Sim YS, Park HY, Jeon K, Suh GY, Kwon OJ, Koh WJ. Standardized combination antibiotic treatment of Mycobacterium avium complex lung disease. *Yonsei Med J.* 2010 Nov;51(6):888-94. doi: 10.3349/ymj.2010.51.6.888. PubMed PMID: 20879056; PubMed Central PMCID: PMC2995975.

628: Papp KA, Poulin Y, Bissonnette R, Bourcier M, Toth D, Rosoph L, Poulin-Costello M, Setterfield M, Syrotuik J. Assessment of the long-term safety and effectiveness of etanercept for the treatment of psoriasis in an adult population. *J Am Acad Dermatol.* 2012 Feb;66(2):e33-45. doi: 10.1016/j.jaad.2010.07.026. Epub 2010 Sep 17. PubMed PMID: 20850895.

629: Thomas TA, Shenoi SV, Heysell SK, Eksteen FJ, Sunkari VB, Gandhi NR, Friedland G, Shah NS. Extensively drug-resistant tuberculosis in children with human immunodeficiency virus in rural South Africa. *Int J Tuberc Lung Dis*. 2010 Oct;14(10):1244-51. PubMed PMID: 20843414; PubMed Central PMCID: PMC3030274.

630: Koh WJ, Jeon K, Lee NY, Kim BJ, Kook YH, Lee SH, Park YK, Kim CK, Shin SJ, Huitt GA, Daley CL, Kwon OJ. Clinical significance of differentiation of *Mycobacterium massiliense* from *Mycobacterium abscessus*. *Am J Respir Crit Care Med*. 2011 Feb 1;183(3):405-10. doi: 10.1164/rccm.201003-0395OC. Epub 2010 Sep 10. PubMed PMID: 20833823.

631: Meintjes G, Wilkinson RJ, Morroni C, Pepper DJ, Rebe K, Rangaka MX, Oni T, Maartens G. Randomized placebo-controlled trial of prednisone for paradoxical tuberculosis-associated immune reconstitution inflammatory syndrome. *AIDS*. 2010 Sep 24;24(15):2381-90. doi: 10.1097/QAD.0b013e32833dfc68. PubMed PMID: 20808204; PubMed Central PMCID: PMC2940061.

632: Chen YC, Chang HC, Chen CJ, Liu SF, Chin CH, Wu CC, Chao TY, Lie CH, Wang CC, Lin MC. Blood absolute T cell counts may predict 2-month treatment response in patients with pulmonary tuberculosis. *Dis Markers*. 2010;28(6):343-52. doi: 10.3233/DMA-2010-0714. PubMed PMID: 20683148; PubMed Central PMCID: PMC3833334.

633: Senkoro M, Mfinanga SG, MÅrkve O. Smear microscopy and culture conversion rates among smear positive pulmonary tuberculosis patients by HIV status in Dar es Salaam, Tanzania. *BMC Infect Dis*. 2010 Jul 16;10:210. doi: 10.1186/1471-2334-10-210. PubMed PMID: 20637077; PubMed Central PMCID: PMC2918607.

634: Fitzwater SP, Caviedes L, Gilman RH, Coronel J, LaChira D, Salazar C, Saravia JC, Reddy K, Friedland JS, Moore DA. Prolonged infectiousness of

tuberculosis patients in a directly observed therapy short-course program with standardized therapy. Clin Infect Dis. 2010 Aug 15;51(4):371-8. doi: 10.1086/655127. PubMed PMID: 20624064; PubMed Central PMCID: PMC4465448.

635: Grant PM, Komarow L, Andersen J, Sereti I, Pahwa S, Lederman MM, Eron J, Sanne I, Powderly W, Hogg E, Suckow C, Zolopa A. Risk factor analyses for immune reconstitution inflammatory syndrome in a randomized study of early vs. deferred ART during an opportunistic infection. PLoS One. 2010 Jul 1;5(7):e11416. doi: 10.1371/journal.pone.0011416. PubMed PMID: 20617176; PubMed Central PMCID: PMC2895658.

636: Yamshchikov AV, Kurbatova EV, Kumari M, Blumberg HM, Ziegler TR, Ray SM, Tangpricha V. Vitamin D status and antimicrobial peptide cathelicidin (LL-37) concentrations in patients with active pulmonary tuberculosis. Am J Clin Nutr. 2010 Sep;92(3):603-11. doi: 10.3945/ajcn.2010.29411. Epub 2010 Jul 7. PubMed PMID: 20610636; PubMed Central PMCID: PMC2921537.

637: Matteelli A, Carvalho AC, Dooley KE, Kritski A. TMC207: the first compound of a new class of potent anti-tuberculosis drugs. Future Microbiol. 2010 Jun;5(6):849-58. doi: 10.2217/fmb.10.50. Review. PubMed PMID: 20521931; PubMed Central PMCID: PMC2921705.

638: Uzundağ İ, İleri A, Dulkar G, Selçuk Ş, İnmez O, Yılmaz Aydın L, Yılmaz B. Factors that effect sputum culture conversion rate in hospitalized patients with pulmonary tuberculosis who were applied directly observation therapy and non-directly observation therapy. Tuberk Toraks. 2010;58(1):44-52. PubMed PMID: 20517728.

639: Su WJ, Feng JY, Chiu YC, Huang SF, Lee YC. Role of 2-month sputum smears in predicting culture conversion in pulmonary tuberculosis. Eur Respir J. 2011

Feb;37(2):376-83. doi: 10.1183/09031936.00007410. Epub 2010 Jun 1.  
PubMed PMID:  
20516049.

640: Don BR, Kim K, Li J, Dwyer T, Alexander F, Kaysen GA. The effect of etanercept on suppression of the systemic inflammatory response in chronic hemodialysis patients. Clin Nephrol. 2010 Jun;73(6):431-8. PubMed PMID: 20497755.

641: Chiang CY, Schaaf HS. Management of drug-resistant tuberculosis. Int J Tuberc Lung Dis. 2010 Jun;14(6):672-82. Review. PubMed PMID: 20487603.

642: Armijos RX, Weigel MM, Chacon R, Flores L, Campos A. Adjunctive micronutrient supplementation for pulmonary tuberculosis. Salud Publica Mex. 2010 May-Jun;52(3):185-9. PubMed PMID: 20485880.

643: MartÃ-n-Mola E, Sieper J, Leirisalo-Repo M, Dijkmans BA, Vlahos B, Pedersen R, Koenig AS, Freundlich B. Sustained efficacy and safety, including patient-reported outcomes, with etanercept treatment over 5 years in patients with ankylosing spondylitis. Clin Exp Rheumatol. 2010 Mar-Apr;28(2):238-45. Epub 2010 May 13. PubMed PMID: 20483046.

644: Misra UK, Kalita J, Nair PP. Role of aspirin in tuberculous meningitis: a randomized open label placebo controlled trial. J Neurol Sci. 2010 Jun 15;293(1-2):12-7. doi: 10.1016/j.jns.2010.03.025. Epub 2010 Apr 24. PubMed PMID: 20421121.

645: Hesselning AC, Walzl G, Enarson DA, Carroll NM, Duncan K, Lukey PT, Lombard C, Donald PR, Lawrence KA, Gie RP, van Helden PD, Beyers N. Baseline sputum time to detection predicts month two culture conversion and relapse in non-HIV-infected patients. Int J Tuberc Lung Dis. 2010 May;14(5):560-70. PubMed PMID: 20392348.

646: Centers for Disease Control and Prevention (CDC). Monitoring tuberculosis

programs - National Tuberculosis Indicator Project, United States, 2002-2008.  
MMWR Morb Mortal Wkly Rep. 2010 Mar 19;59(10):295-8. PubMed PMID: 20300056.

647: Shu CC, Wang JT, Lee CH, Wang JY, Lee LN, Yu CJ. Predicting results of mycobacterial culture on sputum smear reversion after anti-tuberculous treatment: a case control study. BMC Infect Dis. 2010 Mar 6;10:48. doi: 10.1186/1471-2334-10-48. PubMed PMID: 20205743; PubMed Central PMCID: PMC2845134.

648: Heller T, Lessells RJ, Wallrauch CG, Bärnighausen T, Cooke GS, Mhlongo L, Master I, Newell ML. Community-based treatment for multidrug-resistant tuberculosis in rural KwaZulu-Natal, South Africa. Int J Tuberc Lung Dis. 2010 Apr;14(4):420-6. PubMed PMID: 20202299.

649: Varkey P, Harris S, Edmonson L, McCoy K, Aksamit T, Brennan MD. An innovative model for tuberculosis control: an academic medical center-public health department partnership. Minn Med. 2010 Jan;93(1):39-41. PubMed PMID: 20191731.

650: Eum SY, Lee YJ, Min JH, Kwak HK, Hong MS, Kong JH, Hwang SH, Park SK, Leblanc JJ, Via LE, Barry CE 3rd, Cho SN. Association of antigen-stimulated release of tumor necrosis factor-alpha in whole blood with response to chemotherapy in patients with pulmonary multidrug-resistant tuberculosis. Respiration. 2010;80(4):275-84. doi: 10.1159/000283687. Epub 2010 Feb 10. PubMed PMID: 20145387; PubMed Central PMCID: PMC2955738.

651: Qureshi SA, Bashir MU, Yaqinuddin A. Utility of DNA methylation markers for diagnosing cancer. Int J Surg. 2010;8(3):194-8. doi: 10.1016/j.ijsu.2010.02.001. Epub 2010 Feb 6. Review. PubMed PMID: 20139036.

652: Kuaban C, Bame R, Mouangue L, Djella S, Yomgni C. Non conversion of sputum

smears in new smear positive pulmonary tuberculosis patients in YaoundÃ©, Cameroon. East Afr Med J. 2009 May;86(5):219-25. PubMed PMID: 20084990.

653: Huang F, Zhang FC, Bao CD, Tao Y, Gu JR, Xu JH, Zhu P, Xu HJ, Zhang ZY, Zhao DB, Wu DH. [Adalimumab plus methotrexate for the treatment of rheumatoid arthritis: a multi-center randomized, double-blind, placebo-controlled clinical study.]. Zhonghua Nei Ke Za Zhi. 2009 Nov;48(11):916-21. Chinese. PubMed PMID: 20079321.

654: Fairall L, Bachmann MO, Zwarenstein M, Bateman ED, Niessen LW, Lombard C, Majara B, English R, Bheekie A, van Rensburg D, Mayers P, Peters A, Chapman R. Cost-effectiveness of educational outreach to primary care nurses to increase tuberculosis case detection and improve respiratory care: economic evaluation alongside a randomised trial. Trop Med Int Health. 2010 Mar;15(3):277-86. doi: 10.1111/j.1365-3156.2009.02455.x. Epub 2010 Jan 11. PubMed PMID: 20070633.

655: Kwange SO, Budambula NL. Effectiveness of anti-tuberculosis treatment among patients receiving highly active antiretroviral therapy at Vihiga district hospital in 2007. Indian J Med Microbiol. 2010 Jan-Mar;28(1):21-5. doi: 10.4103/0255-0857.58723. PubMed PMID: 20061758.

656: Mardining Raras TY, Noor Chozin I. The Soluble Plasminogen Activator Receptor as a Biomarker on Monitoring the Therapy Progress of Pulmonary TB-AFB(+) Patients. Tuberc Res Treat. 2010;2010:406346. doi: 10.1155/2010/406346. Epub 2010 Oct 4. PubMed PMID: 22567258; PubMed Central PMCID: PMC3335589.

657: Via LE, Cho SN, Hwang S, Bang H, Park SK, Kang HS, Jeon D, Min SY, Oh T, Kim Y, Kim YM, Rajan V, Wong SY, Shamputa IC, Carroll M, Goldfeder L, Lee SA, Holland SM, Eum S, Lee H, Barry CE 3rd. Polymorphisms associated with resistance and

cross-resistance to aminoglycosides and capreomycin in *Mycobacterium tuberculosis* isolates from South Korean Patients with drug-resistant tuberculosis. *J Clin Microbiol.* 2010 Feb;48(2):402-11. doi: 10.1128/JCM.01476-09. Epub 2009 Dec 23. PubMed PMID: 20032248; PubMed Central PMCID: PMC2815586.

658: Moreno A, S nchez F, Nelson J, Mir s JM, Cayl  JA; Grupo de Trabajo de la UITB-TBTC (site 31). [On the way to shortening tuberculosis treatments: clinical trials of the Unitat d' Investagaci  en Tuberculosis de Barcelona supported by the Centers for Disease Control and Prevention]. *Gac Sanit.* 2010 Mar-Apr;24(2):171.e1-6. doi: 10.1016/j.gaceta.2009.08.008. Epub 2009 Dec 10. Spanish. PubMed PMID: 20005019.

659: Wang JY, Wang JT, Tsai TH, Hsu CL, Yu CJ, Hsueh PR, Lee LN, Yang PC. Adding moxifloxacin is associated with a shorter time to culture conversion in pulmonary tuberculosis. *Int J Tuberc Lung Dis.* 2010 Jan;14(1):65-71. PubMed PMID: 20003697.

660: Shao HJ, Crump JA, Ramadhani HO, Uiso LO, Ole-Nguyaine S, Moon AM, Kiwera RA, Woods CW, Shao JF, Bartlett JA, Thielman NM. Early versus delayed fixed dose combination abacavir/lamivudine/zidovudine in patients with HIV and tuberculosis in Tanzania. *AIDS Res Hum Retroviruses.* 2009 Dec;25(12):1277-85. doi: 10.1089/aid.2009.0100. PubMed PMID: 20001518; PubMed Central PMCID: PMC2858925.

661: Gull n JA, Su rez I, Lecuona M, Fern ndez R, Rubinos G, Medina A, Cabrera C, Gonz lez I. Time to culture conversion in smokers with pulmonary tuberculosis. *Monaldi Arch Chest Dis.* 2009 Sep;71(3):127-31. PubMed PMID: 19999959.

662: Horne DJ, Johnson CO, Oren E, Spitters C, Narita M. How soon should patients with smear-positive tuberculosis be released from inpatient isolation? *Infect Control Hosp Epidemiol.* 2010 Jan;31(1):78-84. doi: 10.1086/649022. PubMed PMID: 19968490; PubMed Central PMCID: PMC3046814.

663: Yu DP, Fu Y. [Surgical treatment of 133 cases of multi-drug-resistant pulmonary tuberculosis]. Zhonghua Jie He He Hu Xi Za Zhi. 2009 Jun;32(6):450-3. Chinese. PubMed PMID: 19957782.

664: Lounis N, Guillemont J, Veziris N, Koul A, Jarlier V, Andries K. [R207910 (TMC207): a new antibiotic for the treatment of tuberculosis]. Med Mal Infect. 2010 Jul;40(7):383-90. doi: 10.1016/j.medmal.2009.09.007. Epub 2009 Dec 1. Review. French. PubMed PMID: 19954909.

665: Malhotra HS, Garg RK, Singh MK, Agarwal A, Verma R. Corticosteroids (dexamethasone versus intravenous methylprednisolone) in patients with tuberculous meningitis. Ann Trop Med Parasitol. 2009 Oct;103(7):625-34. doi: 10.1179/000349809X12502035776315. PubMed PMID: 19825284.

666: Green JA, Tran CT, Farrar JJ, Nguyen MT, Nguyen PH, Dinh SX, Ho ND, Ly CV, Tran HT, Friedland JS, Thwaites GE. Dexamethasone, cerebrospinal fluid matrix metalloproteinase concentrations and clinical outcomes in tuberculous meningitis. PLoS One. 2009 Sep 30;4(9):e7277. doi: 10.1371/journal.pone.0007277. PubMed PMID: 19789647; PubMed Central PMCID: PMC2748711.

667: Huang HC, Lee LA, Fang TJ, Li HY, Lo CC, Wu JH. Transnasal butorphanol for pain relief after uvulopalatopharyngoplasty - a hospital-based, randomized study. Chang Gung Med J. 2009 Jul-Aug;32(4):390-9. PubMed PMID: 19664345.

668: Jeon K, Kwon OJ, Lee NY, Kim BJ, Kook YH, Lee SH, Park YK, Kim CK, Koh WJ. Antibiotic treatment of Mycobacterium abscessus lung disease: a retrospective analysis of 65 patients. Am J Respir Crit Care Med. 2009 Nov 1;180(9):896-902. doi: 10.1164/rccm.200905-0704OC. Epub 2009 Aug 6. PubMed PMID: 19661243.

669: Wang JY, Lee LN, Yu CJ, Chien YJ, Yang PC; Tami Group. Factors influencing time to smear conversion in patients with smear-positive pulmonary tuberculosis.

Respirology. 2009 Sep;14(7):1012-9. doi: 10.1111/j.1440-1843.2009.01598.x. Epub 2009 Jul 30. PubMed PMID: 19659516.

670: Sandborn WJ, Rutgeerts P, Feagan BG, Reinisch W, Olson A, Johanns J, Lu J, Horgan K, Rachmilewitz D, Hanauer SB, Lichtenstein GR, de Villiers WJ, Present D, Sands BE, Colombel JF. Colectomy rate comparison after treatment of ulcerative

colitis with placebo or infliximab. Gastroenterology. 2009 Oct;137(4):1250-60; quiz 1520. doi: 10.1053/j.gastro.2009.06.061. Epub 2009 Jul 28. PubMed PMID: 19596014.

671: Kang WL, Xie YG, Tan WG, Chu NH, Li L, You YH, Yang YZ, Wang XM, Yan XL, Miao ZP, Duanmu HJ. [Study on the efficacy and safety of short-term treatment including fluoroquinolones anti-tuberculosis drugs for rifampicin resistant pulmonary tuberculosis]. Zhonghua Liu Xing Bing Xue Za Zhi. 2009 Feb;30(2):179-83. Chinese. PubMed PMID: 19565883.

672: Cimen NO, Arslan Z, Saygi A, Ocak K, Babacan F, Kurutepe M. Radiometric vs. agar proportion methods for assessing ethionamide resistance and its clinical effects in multidrug-resistant tuberculosis. Int J Tuberc Lung Dis. 2009 Jul;13(7):907-13. PubMed PMID: 19555543.

673: O'Donnell MR, Padayatchi N, Master I, Osburn G, Horsburgh CR. Improved early results for patients with extensively drug-resistant tuberculosis and HIV in South Africa. Int J Tuberc Lung Dis. 2009 Jul;13(7):855-61. PubMed PMID: 19555535; PubMed Central PMCID: PMC2855970.

674: Gao XF, Li J, Yang ZW, Li YP. Rifapentine vs. rifampicin for the treatment of pulmonary tuberculosis: a systematic review. Int J Tuberc Lung Dis. 2009 Jul;13(7):810-9. Review. PubMed PMID: 19555529.

675: Johnson JL, Hadad DJ, Dietze R, Maciel EL, Sewali B, Gitta P, Okwera A, Mugerwa RD, Alcaneses MR, Quelapio MI, Tupasi TE, Horter L, Debanne SM, Eisenach KD, Boom WH. Shortening treatment in adults with noncavitary tuberculosis and 2-month culture conversion. *Am J Respir Crit Care Med*. 2009 Sep 15;180(6):558-63. doi: 10.1164/rccm.200904-0536OC. Epub 2009 Jun 19. PubMed PMID: 19542476; PubMed Central PMCID: PMC2742745.

676: Hasegawa N, Nishimura T, Ohtani S, Takeshita K, Fukunaga K, Tasaka S, Urano T, Ishii K, Miyairi M, Ishizaka A. Therapeutic effects of various initial combinations of chemotherapy including clarithromycin against *Mycobacterium avium* complex pulmonary disease. *Chest*. 2009 Dec;136(6):1569-1575. doi: 10.1378/chest.08-2567. Epub 2009 Jun 19. PubMed PMID: 19542259.

677: Turusov AA, Valiev RSh, Chesnokova RV. [Comparative study of microscopy by the Ziehl Neelsen method, routine fluorescence microscopy, and fluorescence microscopy using a lumin attachment in the diagnosis of acid-resistant mycobacteria]. *Probl Tuberk Bolezn Legk*. 2009;(4):41-5. Russian. PubMed PMID: 19514454.

678: Diacon AH, Pym A, Grobusch M, Patientia R, Rustomjee R, Page-Shipp L, Pistorius C, Krause R, Bogoshi M, Churchyard G, Venter A, Allen J, Palomino JC, De Marez T, van Heeswijk RP, Lounis N, Meyvisch P, Verbeeck J, Parys W, de Beule K, Andries K, Mc Neeley DF. The diarylquinoline TMC207 for multidrug-resistant tuberculosis. *N Engl J Med*. 2009 Jun 4;360(23):2397-405. doi: 10.1056/NEJMoa0808427. PubMed PMID: 19494215.

679: Koh WJ, Kwon OJ, Gwak H, Chung JW, Cho SN, Kim WS, Shim TS. Daily 300 mg dose of linezolid for the treatment of intractable multidrug-resistant and extensively drug-resistant tuberculosis. *J Antimicrob Chemother*. 2009 Aug;64(2):388-91. doi: 10.1093/jac/dkp171. Epub 2009 May 25. PubMed PMID: 19468028.

680: Bartacek A, Schmitt D, Panosch B, Borek M; Rimstar 4-FDC Study Group.

Comparison of a four-drug fixed-dose combination regimen with a single tablet regimen in smear-positive pulmonary tuberculosis. *Int J Tuberc Lung Dis.* 2009 Jun;13(6):760-6. PubMed PMID: 19460254.

681: Zaitzeva SI, Matveeva SL, Gerasimova TG, Pashkov YN, Butov DA, Pylypchuk VS, Frolov VM, Kutsyna GA. Treatment of cavitary and infiltrating pulmonary tuberculosis with and without the immunomodulator Dzherelo. *Clin Microbiol Infect.* 2009 Dec;15(12):1154-62. doi: 10.1111/j.1469-0691.2009.02760.x. Epub 2009 May 16. PubMed PMID: 19456829.

682: Jain NK, Agnihotri SP, Sharma KK, Gupta S, Gupta P. Extensively drug resistance (XDR) tb is not always fatal. *Indian J Tuberc.* 2009 Jan;56(1):48-50. PubMed PMID: 19402272.

683: Dooley KE, Tang T, Golub JE, Dorman SE, Cronin W. Impact of diabetes mellitus on treatment outcomes of patients with active tuberculosis. *Am J Trop Med Hyg.* 2009 Apr;80(4):634-9. PubMed PMID: 19346391; PubMed Central PMCID: PMC2750857.

684: Conde MB, Efron A, Loredó C, De Souza GR, Graça NP, Cezar MC, Ram M, Chaudhary MA, Bishai WR, Kritski AL, Chaisson RE. Moxifloxacin versus ethambutol in the initial treatment of tuberculosis: a double-blind, randomised, controlled phase II trial. *Lancet.* 2009 Apr 4;373(9670):1183-9. doi: 10.1016/S0140-6736(09)60333-0. PubMed PMID: 19345831; PubMed Central PMCID: PMC2866651.

685: Mukherjee A, Sarkar A, Saha I, Biswas B, Bhattacharyya PS. Outcomes of different subgroups of smear-positive retreatment patients under RNTCP in rural West Bengal, India. *Rural Remote Health.* 2009 Jan-Mar;9(1):926. Epub 2009 Feb 27.

PubMed PMID: 19260766.

686: Wejse C, Gomes VF, Rabna P, Gustafson P, Aaby P, Lisse IM, Andersen PL, Glerup H, Sodemann M. Vitamin D as supplementary treatment for tuberculosis: a double-blind, randomized, placebo-controlled trial. *Am J Respir Crit Care Med*. 2009 May 1;179(9):843-50. doi: 10.1164/rccm.200804-5670C. Epub 2009 Jan 29. PubMed PMID: 19179490.

687: Kobashi Y, Oka M. [Long-term observation of pulmonary *Mycobacterium avium* complex disease treated with chemotherapy-- following the guidelines for treatment]. *Kekkaku*. 2008 Dec;83(12):779-84. Japanese. PubMed PMID: 19172823.

688: Li L, Zheng SH, Chu NH, Xie YG, Yang YZ, Li Q, Wang XM, Yan XL, Tan WG, Miao ZP, Duanmu HJ. [Effects of two treatment regimens for drug-resistant tuberculosis in tuberculosis control project areas: a comparative study]. *Zhonghua Yi Xue Za Zhi*. 2008 Dec 30;88(48):3387-91. Chinese. PubMed PMID: 19159566.

689: Menter A, Reich K, Gottlieb AB, Bala M, Li S, Hsu MC, Guzzo C, Diels J, Gelfand JM. Adverse drug events in infliximab-treated patients compared with the general and psoriasis populations. *J Drugs Dermatol*. 2008 Dec;7(12):1137-46. PubMed PMID: 19137767.

690: Martineau AR, Nanzer AM, Satkunam KR, Packe GE, Rainbow SJ, Maunsell ZJ, Timms PM, Venton TR, Eldridge SM, Davidson RN, Wilkinson RJ, Griffiths CJ. Influence of a single oral dose of vitamin D(2) on serum 25-hydroxyvitamin D concentrations in tuberculosis patients. *Int J Tuberc Lung Dis*. 2009 Jan;13(1):119-25. PubMed PMID: 19105889.

691: Kawada H, Yamazato M, Shinozawa Y, Suzuki K, Otani S, Ouchi M, Miyairi M. [Achievement of sputum culture negative conversion by minocycline in a case with extensively drug-resistant pulmonary tuberculosis]. *Kekkaku*. 2008 Nov;83(11):725-8. Japanese. PubMed PMID: 19086436.

692: Ramirez J, Mason C, Ali J, Lopez FA. Mycobacterium avium complex pulmonary disease: management options in HIV-negative patients. J La State Med Soc. 2008 Sep-Oct;160(5):248-54; quiz 254, 293. PubMed PMID: 19048978.

693: Matsunaga K, Nagata N, Iwata Y, Kumazoe H, Komori M, Wakamatsu K, Kajiki A, Kitahara Y. [Treatment outcome of patients with pulmonary tuberculosis before and after the induction of directly observed therapy (DOT)]. Kekkaku. 2008 Oct;83(10):667-72. Japanese. PubMed PMID: 19048942.

694: Hu Y, Jiang WL, Wang WB, Xu B. [A-cohort study on the standard short-course chemotherapy program for drug resistant tuberculosis in the rural counties in Eastern China]. Zhonghua Liu Xing Bing Xue Za Zhi. 2008 Jun;29(6):540-4. Chinese. PubMed PMID: 19040032.

695: Parrish SC, Myers J, Lazarus A. Nontuberculous mycobacterial pulmonary infections in Non-HIV patients. Postgrad Med. 2008 Nov;120(4):78-86. doi: 10.3810/pgm.2008.11.1942. Review. PubMed PMID: 19020369.

696: Shah NS, Pratt R, Armstrong L, Robison V, Castro KG, Cegielski JP. Extensively drug-resistant tuberculosis in the United States, 1993-2007. JAMA. 2008 Nov 12;300(18):2153-60. doi: 10.1001/jama.300.18.2153. PubMed PMID: 19001626.

697: Kobashi Y, Mouri K, Yagi S, Obase Y, Miyashita N, Oka M. Transitional changes in T-cell responses to Mycobacterium tuberculosis-specific antigens during treatment. J Infect. 2009 Mar;58(3):197-204. doi: 10.1016/j.jinf.2008.08.009. Epub 2008 Oct 10. PubMed PMID: 18848730.

698: Pajankar S, Khandekar R, Al Amri MA, Al Lawati MR. Factors influencing sputum smear conversion at one and two months of tuberculosis treatment. Oman Med

J. 2008 Oct;23(4):263-8. PubMed PMID: 22334839; PubMed Central PMCID: PMC3273921.

699: Shiraishi Y, Katsuragi N, Kita H, Toishi M, Onda T. Experience with pulmonary resection for extensively drug-resistant tuberculosis. *Interact Cardiovasc Thorac Surg.* 2008 Dec;7(6):1075-8. doi: 10.1510/icvts.2008.185124. Epub 2008 Sep 23. PubMed PMID: 18812334.

700: Krapp F, VÃ©liz JC, Cornejo E, Gotuzzo E, Seas C. Bodyweight gain to predict treatment outcome in patients with pulmonary tuberculosis in Peru. *Int J Tuberc Lung Dis.* 2008 Oct;12(10):1153-9. PubMed PMID: 18812045.

701: Temple B, Ayakaka I, Ogwang S, Nabanjja H, Kayes S, Nakubulwa S, Worodria W, Levin J, Joloba M, Okwera A, Eisenach KD, Mc Nerney R, Elliott AM, Smith PG, Mugerwa RD, Ellner JJ, Jones-LÃ³pez EC. Rate and amplification of drug resistance among previously-treated patients with tuberculosis in Kampala, Uganda. *Clin Infect Dis.* 2008 Nov 1;47(9):1126-34. doi: 10.1086/592252. PubMed PMID: 18808360; PubMed Central PMCID: PMC2883442.

702: Fujino T, Fusegawa H, Nishiumi M, Okubo Y, Kakizaki T, Maejima K, Sugimori H. [Epidemiological study on factors affecting the hospitalization period of patients with active tuberculosis]. *Kekkaku.* 2008 Aug;83(8):567-72. Japanese. PubMed PMID: 18800648.

703: Zachariae C, MÃrk NJ, Reunala T, Lorentzen H, Falk E, Karvonen SL, Johannesson A, ClarÃ©us B, Skov L, MÃrk G, Walker S, Qvitzau S. The combination of etanercept and methotrexate increases the effectiveness of treatment in active psoriasis despite inadequate effect of methotrexate therapy. *Acta Derm Venereol.* 2008;88(5):495-501. doi: 10.2340/00015555-0511. PubMed PMID: 18779890.

704: Casanova-Cardiel LJ, Flores-Barrientos OI, Schabib-Hany M, Miranda-Ruiz R,

Castañón-González JA. [Cosyntropin test in severe active tuberculosis]. Cir Cir. 2008 Jul-Aug;76(4):305-9. Spanish. PubMed PMID: 18778540.

705: Maññej S, Belhaoui N, Bourguiba M, Mahouachi R, Chtourou A, Taktak S, Fennira H, Slim L, Kheder AB, Drira I. [Pulmonary tuberculosis and diabetes. A retrospective study of 60 patients in Tunisia]. Presse Med. 2009 Jan;38(1):20-4. doi: 10.1016/j.lpm.2008.05.011. Epub 2008 Sep 3. French. PubMed PMID: 18771896.

706: Park SK, Kim JH, Kang H, Cho JS, Smego RA Jr. Pulmonary resection combined with isoniazid- and rifampin-based drug therapy for patients with multidrug-resistant and extensively drug-resistant tuberculosis. Int J Infect Dis. 2009 Mar;13(2):170-5. doi: 10.1016/j.ijid.2008.06.001. Epub 2008 Sep 2. PubMed PMID: 18768342.

707: Gorás-Pereiras A, Fernández-Villar A, Chouciño-Garrido N, Otero-Baamonde M, Vázquez-Gallardo R. [Factors predicting new tuberculosis infections and tuberculin conversions in a contact tracing system]. Enferm Clin. 2008 Jul-Aug;18(4):183-9. Spanish. PubMed PMID: 18724914.

708: van der Heijde D, Schiff MH, Sieper J, Kivitz AJ, Wong RL, Kupper H, Dijkmans BA, Mease PJ, Davis JC Jr; ATLAS Study Group. Adalimumab effectiveness for the treatment of ankylosing spondylitis is maintained for up to 2 years: long-term results from the ATLAS trial. Ann Rheum Dis. 2009 Jun;68(6):922-9. doi: 10.1136/ard.2007.087270. Epub 2008 Aug 13. PubMed PMID: 18701556; PubMed Central PMCID: PMC2674550.

709: Fu Y, Chu NH, Yuan SL, Chen W, Wang W, Luo YA, Xiao HP, Zhu LZ. [The effect of interventional therapy in multimodality treatment on multi-drug resistant pulmonary tuberculosis]. Zhonghua Jie He He Hu Xi Za Zhi. 2008 Feb;31(2):95-8. Chinese. PubMed PMID: 18683778.

710: van de Kerkhof PC, Segaert S, Lahfa M, Luger TA, Karolyi Z, Kaszuba A, Leigheb G, Camacho FM, Forsea D, Zang C, Boussuge MP, Paolozzi L, Wajdula J. Once weekly administration of etanercept 50 mg is efficacious and well tolerated in patients with moderate-to-severe plaque psoriasis: a randomized controlled trial with open-label extension. *Br J Dermatol*. 2008 Nov;159(5):1177-85. doi: 10.1111/j.1365-2133.2008.08771.x. Epub 2008 Jul 31. PubMed PMID: 18673365.

711: Lei JP, Xiong GL, Hu QF, Li Y, Zong PL, Tu SH, Tu RY. [Immunotherapeutic efficacy of BCG vaccine in pulmonary tuberculosis and its preventive effect on multidrug-resistant tuberculosis]. *Zhonghua Yu Fang Yi Xue Za Zhi*. 2008 Feb;42(2):86-9. Chinese. PubMed PMID: 18642658.

712: Condos R, Hadgiangelis N, Leibert E, Jacquette G, Harkin T, Rom WN. Case series report of a linezolid-containing regimen for extensively drug-resistant tuberculosis. *Chest*. 2008 Jul;134(1):187-92. doi: 10.1378/chest.07-1988. PubMed PMID: 18628223.

713: Banerjee R, Allen J, Westenhause J, Oh P, Elms W, Desmond E, Nitta A, Royce S, Flood J. Extensively drug-resistant tuberculosis in california, 1993-2006. *Clin Infect Dis*. 2008 Aug 15;47(4):450-7. doi: 10.1086/590009. PubMed PMID: 18616396.

714: Prasad R, Verma SK, Sahai S, Kumar S, Jain A. Efficacy and safety of kanamycin, ethionamide, PAS and cycloserine in multidrug-resistant pulmonary tuberculosis patients. *Indian J Chest Dis Allied Sci*. 2006 Jul-Sep;48(3):183-6. PubMed PMID: 18610675.

715: Bawri S, Ali S, Phukan C, Tayal B, Baruwa P. A study of sputum conversion in new smear positive pulmonary tuberculosis cases at the monthly intervals of 1, 2 & 3 month under directly observed treatment, short course (dots) regimen. *Lung*

India. 2008 Jul;25(3):118-23. doi: 10.4103/0970-2113.44122. PubMed  
PMID:  
20165663; PubMed Central PMCID: PMC2822329.

716: Koh WJ, Kim YH, Kwon OJ, Choi YS, Kim K, Shim YM, Kim J.  
Surgical treatment  
of pulmonary diseases due to nontuberculous mycobacteria. J Korean  
Med Sci. 2008  
Jun;23(3):397-401. doi: 10.3346/jkms.2008.23.3.397. PubMed PMID:  
18583873; PubMed  
Central PMCID: PMC2526522.

717: Aggarwal D, Mohapatra PR. Sputum conversion at the end of  
intensive phase  
treatment of pulmonary tuberculosis patients with diabetes mellitus  
or HIV  
infection. Indian J Med Res. 2008 Apr;127(4):408; author reply 408-  
9. PubMed  
PMID: 18577800.

718: Pheiffer C, Carroll NM, Beyers N, Donald P, Duncan K, Uys P,  
van Helden P.  
Time to detection of Mycobacterium tuberculosis in BACTEC systems as  
a viable  
alternative to colony counting. Int J Tuberc Lung Dis. 2008  
Jul;12(7):792-8.  
PubMed PMID: 18544206.

719: Grahmann PR, Braun RK. A new protocol for multiple inhalation  
of IFN-gamma  
successfully treats MDR-TB: a case study. Int J Tuberc Lung Dis.  
2008  
Jun;12(6):636-44. PubMed PMID: 18492330.

720: Swaminathan S, Deivanayagam CN, Rajasekaran S, Venkatesan P,  
Padmapriyadarsini C, Menon PA, Ponnuraja C, Dilip M. Long term  
follow up of  
HIV-infected patients with tuberculosis treated with 6-month  
intermittent short  
course chemotherapy. Natl Med J India. 2008 Jan-Feb;21(1):3-8.  
PubMed PMID:  
18472696.

721: Lovell DJ, Reiff A, Ilowite NT, Wallace CA, Chon Y, Lin SL,  
Baumgartner SW,  
Giannini EH; Pediatric Rheumatology Collaborative Study Group.  
Safety and  
efficacy of up to eight years of continuous etanercept therapy in  
patients with

juvenile rheumatoid arthritis. *Arthritis Rheum.* 2008 May;58(5):1496-504. doi: 10.1002/art.23427. PubMed PMID: 18438876.

722: Zaka-Ur-Rehman Z, Jamshaid M, Chaudhry A. Clinical evaluation and monitoring of adverse effects for fixed multidose combination against single drug therapy in pulmonary tuberculosis patients. *Pak J Pharm Sci.* 2008 Apr;21(2):185-94. PubMed PMID: 18390450.

723: Kaur G, Goel NK, Kumar D, Janmeja AK, Swami HM, Kalia M. Treatment outcomes of patients placed on treatment under directly observed therapy short-course (dots). *Lung India.* 2008 Apr;25(2):75-7. doi: 10.4103/0970-2113.44124. PubMed PMID: 20165654; PubMed Central PMCID: PMC2822324.

724: Dhingra VK, Rajpal S, Mittal A, Hanif M. Outcome of multi-drug resistant tuberculosis cases treated by individualized regimens at a tertiary level clinic. *Indian J Tuberc.* 2008 Jan;55(1):15-21. PubMed PMID: 18361306.

725: Kuroishi S, Nakamura Y, Hayakawa H, Shirai M, Nakano Y, Yasuda K, Suda T, Nakamura H, Chida K. Mycobacterium avium complex disease: prognostic implication of high-resolution computed tomography findings. *Eur Respir J.* 2008 Jul;32(1):147-52. doi: 10.1183/09031936.00074207. Epub 2008 Mar 5. PubMed PMID: 18321941.

726: Lopes LK, Teles SA, Souza AC, Rabahi MF, Tipple AF. Tuberculosis risk among nursing professionals from Central Brazil. *Am J Infect Control.* 2008 Mar;36(2):148-51. doi: 10.1016/j.ajic.2007.01.013. PubMed PMID: 18313518.

727: Suzuki A, Nishimura T, Ohtawa S, Mikami J, Kurashima A, Saito M, Mita M. [Clinical efficacy of kanamycin for Mycobacterium avium complex disease]. *Yakugaku Zasshi.* 2008 Mar;128(3):451-60. Japanese. PubMed PMID: 18311066.

728: Ziganshina LE, Squire SB. Fluoroquinolones for treating tuberculosis. Cochrane Database Syst Rev. 2008 Jan 23;(1):CD004795. doi: 10.1002/14651858.CD004795.pub3. Review. Update in: Cochrane Database Syst Rev. 2013;6:CD004795. PubMed PMID: 18254061.

729: Katiyar SK, Bihari S, Prakash S, Mamtani M, Kulkarni H. A randomised controlled trial of high-dose isoniazid adjuvant therapy for multidrug-resistant tuberculosis. Int J Tuberc Lung Dis. 2008 Feb;12(2):139-45. PubMed PMID: 18230245.

730: Rustomjee R, Lienhardt C, Kanyok T, Davies GR, Levin J, Mthiyane T, Reddy C, Sturm AW, Sirgel FA, Allen J, Coleman DJ, Fourie B, Mitchison DA; Gatifloxacin for TB (OFLOTUB) study team. A Phase II study of the sterilising activities of ofloxacin, gatifloxacin and moxifloxacin in pulmonary tuberculosis. Int J Tuberc Lung Dis. 2008 Feb;12(2):128-38. PubMed PMID: 18230244.

731: Chang KC, Leung CC, Yew WW, Kam KM, Yip CW, Ma CH, Tam CM, Leung EC, Law WS, Leung WM. Peak plasma rifampicin level in tuberculosis patients with slow culture conversion. Eur J Clin Microbiol Infect Dis. 2008 Jun;27(6):467-72. doi: 10.1007/s10096-007-0454-6. Epub 2008 Jan 24. PubMed PMID: 18214560.

732: Ciofu O, Lee B, Johannesson M, Hermansen NO, Meyer P, Håiby N; Scandinavian Cystic Fibrosis Study Consortium. Investigation of the algT operon sequence in mucoid and non-mucoid Pseudomonas aeruginosa isolates from 115 Scandinavian patients with cystic fibrosis and in 88 in vitro non-mucoid revertants. Microbiology. 2008 Jan;154(Pt 1):103-13. doi: 10.1099/mic.0.2007/010421-0. PubMed PMID: 18174130.

733: Jeon CY, Hwang SH, Min JH, Prevots DR, Goldfeder LC, Lee H, Eum SY, Jeon DS, Kang HS, Kim JH, Kim BJ, Kim DY, Holland SM, Park SK, Cho SN, Barry CE 3rd, Via LE. Extensively drug-resistant tuberculosis in South Korea: risk factors and

treatment outcomes among patients at a tertiary referral hospital.  
Clin Infect Dis. 2008 Jan 1;46(1):42-9. doi: 10.1086/524017. PubMed PMID: 18171212.

734: Banu Rekha VV, Balasubramanian R, Swaminathan S, Ramachandran R, Rahman F, Sundaram V, Thyagarajan K, Selvakumar N, Adhilakshmi AR, Iliayas S, Narayanan PR. Sputum conversion at the end of intensive phase of Category-1 regimen in the treatment of pulmonary tuberculosis patients with diabetes mellitus or HIV infection: An analysis of risk factors. Indian J Med Res. 2007 Nov;126(5):452-8. PubMed PMID: 18160750.

735: MehiÄ† B. The role of inhalatory corticosteroids and long acting beta(2) agonists in the treatment of patients admitted to hospital due to acute exacerbations of chronic obstructive pulmonary disease (AECOPD). Bosn J Basic Med Sci. 2007 Nov;7(4):352-7. PubMed PMID: 18039195; PubMed Central PMCID: PMC5728610.

736: Dembele SM, Ouedraogo HZ, Combary A, Saleri N, Macq J, Dujardin B. Conversion rate at two-month follow-up of smear-positive tuberculosis patients in Burkina Faso. Int J Tuberc Lung Dis. 2007 Dec;11(12):1339-44. PubMed PMID: 18034956.

737: Picon PD, Bassanesi SL, Caramori ML, Ferreira RL, Jarczewski CA, Vieira PR. Risk factors for recurrence of tuberculosis. J Bras Pneumol. 2007 Sep-Oct;33(5):572-8. English, Portuguese. PubMed PMID: 18026656.

738: Sasaki Y, Yamagishi F, Yagi T, Hashimoto T, Bekku R, Kawasaki T, Shinozaki A. [Evaluation of care for elderly pulmonary tuberculosis patients]. Kekkaku. 2007 Oct;82(10):733-9. Japanese. PubMed PMID: 18018597.

739: Takahashi K, Hasegawa Y, Abe T, Yamamoto T, Nakashima K, Imaizumi K, Shimokata K. SLC11A1 (formerly NRAMP1) polymorphisms associated with

multidrug-resistant tuberculosis. Tuberculosis (Edinb). 2008  
Jan;88(1):52-7. Epub  
2007 Oct 18. PubMed PMID: 17950034.

740: Hsieh CJ, Lin LC, Kuo BI, Chiang CH, Su WJ, Shih JF. Exploring  
the efficacy  
of a case management model using DOTS in the adherence of patients  
with pulmonary  
tuberculosis. J Clin Nurs. 2008 Apr;17(7):869-75. PubMed PMID:  
17850292.

741: Ye JJ, Wu TS, Chiang PC, Lee MH. Factors that affect sputum  
conversion and  
treatment outcome in patients with Mycobacterium avium-  
intracellulare complex  
pulmonary disease. J Microbiol Immunol Infect. 2007 Aug;40(4):342-8.  
PubMed PMID:  
17712469.

742: Schreiber S, Khaliq-Kareemi M, Lawrance IC, Thomsen OÃ,~,  
Hanauer SB, McColm  
J, Bloomfield R, Sandborn WJ; PRECISE 2 Study Investigators.  
Maintenance therapy  
with certolizumab pegol for Crohn's disease. N Engl J Med. 2007 Jul  
19;357(3):239-50. Erratum in: N Engl J Med. 2007 Sep  
27;357(13):1357. PubMed  
PMID: 17634459.

743: Hill PC, Brookes RH, Fox A, Jackson-Sillah D, Jeffries DJ,  
Lugos MD, Donkor  
SA, Adetifa IM, de Jong BC, Aiken AM, Adegbola RA, McAdam KP.  
Longitudinal  
assessment of an ELISPOT test for Mycobacterium tuberculosis  
infection. PLoS Med.  
2007 Jun;4(6):e192. PubMed PMID: 17564487; PubMed Central PMCID:  
PMC1891317.

744: Mathur ML. Role of vitamin A supplementation in the treatment  
of  
tuberculosis. Natl Med J India. 2007 Jan-Feb;20(1):16-21. Review.  
PubMed PMID:  
17557517.

745: Tamura A, Hebisawa A, Masuda K, Shimada M, Ichikawa M, Kunogi  
M, Kaneko Y,  
Kawashima M, Suzuki J, Ariga H, Yagi O, Ohshima N, Matsui H, Nagai  
H, Akagawa S,  
Nagayama N, Kawabe Y, Machida K, Kurashima A, Nakajima Y, Yotsumoto  
H.

[Coexisting lung cancer and active pulmonary mycobacteriosis]. Nihon Kogyuki Gakkai Zasshi. 2007 May;45(5):382-93. Japanese. PubMed PMID: 17554981.

746: Gullón Blanco JA, Suárez Toste I, Lecuona Fernández M, Galindo Morales R, Fernández Alvarez R, Rubinos Cuadrado G, Medina González A, González Martínez IJ. [Tobacco smoking and sputum smear conversion in pulmonary tuberculosis]. Med Clin (Barc). 2007 Apr 21;128(15):565-8. Spanish. PubMed PMID: 17462193.

747: Babb C, van der Merwe L, Beyers N, Pfeiffer C, Walzl G, Duncan K, van Helden P, Hoal EG. Vitamin D receptor gene polymorphisms and sputum conversion time in pulmonary tuberculosis patients. Tuberculosis (Edinb). 2007 Jul;87(4):295-302. Epub 2007 Apr 20. PubMed PMID: 17449323.

748: Wiysonge CS, Ntsekhe M, Gumedze F, Sliwa K, Blackett KN, Commerford PJ, Volmink JA, Mayosi BM. Contemporary use of adjunctive corticosteroids in tuberculous pericarditis. Int J Cardiol. 2008 Mar 14;124(3):388-90. Epub 2007 Apr 18. PubMed PMID: 17445921.

749: Kurashima A. [Perspective of pulmonary MAC infection treatment]. Kekkaku. 2007 Mar;82(3):195-9. Review. Japanese. PubMed PMID: 17444124.

750: Feng YL, Ling CQ, Chen Z, Li B, Gu W. [Ginsenosides and dexamethasone in managing the liver injury and renal function after transcatheter arterial chemoembolization for hepatic carcinoma patient]. Zhonghua Zhong Liu Za Zhi. 2006 Nov;28(11):844-7. Chinese. PubMed PMID: 17416007.

751: Fortón J, Martínez-Dávila P, Molina A, Navas E, Hermida JM, Cobo J, Gómez-Mampaso E, Moreno S. Sputum conversion among patients with pulmonary tuberculosis: are there implications for removal of respiratory isolation? J Antimicrob Chemother. 2007 Apr;59(4):794-8. PubMed PMID: 17392354.

752: Wada M, Mizutani S, Nakajima Y, Ito K, Mitarai S, Hoshino H, Okumura M, Yoshiyama T, Ogata H. [A case of multidrug-resistant pulmonary tuberculosis cured by the regimen including thiacetazone]. *Kekkaku*. 2007 Jan;82(1):33-7. Japanese.  
PubMed PMID: 17310780.

753: Thwaites GE, Macmullen-Price J, Tran TH, Pham PM, Nguyen TD, Simmons CP, White NJ, Tran TH, Summers D, Farrar JJ. Serial MRI to determine the effect of dexamethasone on the cerebral pathology of tuberculous meningitis: an observational study. *Lancet Neurol*. 2007 Mar;6(3):230-6. PubMed PMID: 17303529;  
PubMed Central PMCID: PMC4333204.

754: van de Beek D. Brain teasing effect of dexamethasone. *Lancet Neurol*. 2007 Mar;6(3):203-4. PubMed PMID: 17303522.

755: Hill PC, Jeffries DJ, Brookes RH, Fox A, Jackson-Sillah D, Lugos MD, Donkor SA, de Jong BC, Corrah T, Adegbola RA, McAdam KP. Using ELISPOT to expose false positive skin test conversion in tuberculosis contacts. *PLoS One*. 2007 Jan 31;2(1):e183. PubMed PMID: 17264885; PubMed Central PMCID: PMC1779806.

756: Gähler M, Unsal E, Dursun B, Aydin O, Capan N. Factors influencing sputum smear and culture conversion time among patients with new case pulmonary tuberculosis. *Int J Clin Pract*. 2007 Feb;61(2):231-5. PubMed PMID: 17166185.

757: Shmelev EI, Kunicina YL. Comparison of fenspiride with beclomethasone as adjunctive anti-inflammatory treatment in patients with chronic obstructive pulmonary disease. *Clin Drug Investig*. 2006;26(3):151-9. PubMed PMID: 17163246.

758: Yoshinaga Y, Kanamori T, Ota Y, Miyoshi T, Kagawa H, Yamamura M. Clinical characteristics of *Mycobacterium tuberculosis* infection among rheumatoid

arthritis patients. Mod Rheumatol. 2004;14(2):143-8. PubMed PMID: 17143664.

759: Van Deun A, Aung KJ, Hamid Salim MA, Ali MA, Naha MS, Das PK, Hossain MA, Declercq E. Extension of the intensive phase reduces unfavourable outcomes with the 8-month thioacetazone regimen. Int J Tuberc Lung Dis. 2006 Nov;10(11):1255-61. PubMed PMID: 17131785.

760: Srisaenpang S, Pinitsoontorn S, Singhasivanon P, Kitayaporn D, Kaewkungwal J, Tatsanavivat P, Patjanasoontorn B, Reechaipichitkul W, Thiratakulpisan J, Srinakaran J, Srisaenpang P, Thinkamrop B, Apinyanurak C, Chindawong BO. Missed appointments at a tuberculosis clinic increased the risk of clinical treatment failure. Southeast Asian J Trop Med Public Health. 2006 Mar;37(2):345-50. PubMed PMID: 17124997.

761: Reuter H, Burgess LJ, Louw VJ, Doubell AF. Experience with adjunctive corticosteroids in managing tuberculous pericarditis. Cardiovasc J S Afr. 2006 Sep-Oct;17(5):233-8. PubMed PMID: 17117227.

762: Kubitzka D, Becka M, Mueck W, Zuehlsdorf M. Rivaroxaban (BAY 59-7939)--an oral, direct Factor Xa inhibitor--has no clinically relevant interaction with naproxen. Br J Clin Pharmacol. 2007 Apr;63(4):469-76. Epub 2006 Nov 13. PubMed PMID: 17100983; PubMed Central PMCID: PMC2203251.

763: Jubelt B. Dexamethasone for the treatment of tuberculous meningitis in adolescents and adults. Curr Neurol Neurosci Rep. 2006 Nov;6(6):451-2. PubMed PMID: 17074278.

764: Zhu LZ, Fu Y, Chu NH, Ye ZZ, Xiao HP, Wang W, Yuan SL, Zhang X, Luo YA, Ma LP. [A controlled clinical trial of long course chemotherapy regimens containing rifabutin in the treatment of multi-drug resistant pulmonary tuberculosis]. Zhonghua Jie He He Hu Xi Za Zhi. 2006 Aug;29(8):520-3. Chinese. PubMed PMID:

17074263.

765: Okutan O, Kartaloglu Z, Kunter E, Apaydin M, Ilvan A. Relation of serum adenosine deaminase (ADA) levels with sputum smear conversion in patients with pulmonary tuberculosis. *Ann Saudi Med.* 2006 Sep-Oct;26(5):406-7. PubMed PMID: 17019093; PubMed Central PMCID: PMC6074108.

766: Kobashi Y, Matsushima T. The microbiological and clinical effects of combined therapy according to guidelines on the treatment of pulmonary Mycobacterium avium complex disease in Japan - including a follow-up study. *Respiration.* 2007;74(4):394-400. Epub 2006 Sep 5. PubMed PMID: 16954651.

767: Paralija B. [The effectiveness of direct observed treatment short course (DOTS) in tuberculosis treatment]. *Med Arh.* 2006;60(5):287-91. Bosnian. PubMed PMID: 16944727.

768: Sprinson JE, Lawton ES, Porco TC, Flood JM, Westenhouse JL. Assessing the validity of tuberculosis surveillance data in California. *BMC Public Health.* 2006 Aug 25;6:217. PubMed PMID: 16930492; PubMed Central PMCID: PMC1617097.

769: Wang W, Xiao H, Lu L. Case-control retrospective study of pulmonary tuberculosis in heroin-abusing patients in China. *J Psychoactive Drugs.* 2006 Jun;38(2):203-5. PubMed PMID: 16903459.

770: Gopi PG, Chandrasekaran V, Subramani R, Santha T, Thomas A, Selvakumar N, Narayanan PR. Association of conversion & cure with initial smear grading among new smear positive pulmonary tuberculosis patients treated with Category I regimen. *Indian J Med Res.* 2006 Jun;123(6):807-14. PubMed PMID: 16885603.

771: Griffith DE, Brown-Elliott BA, Langsjoen B, Zhang Y, Pan X, Girard W, Nelson

K, Caccitolo J, Alvarez J, Shepherd S, Wilson R, Graviss EA, Wallace RJ Jr.

Clinical and molecular analysis of macrolide resistance in *Mycobacterium avium* complex lung disease. *Am J Respir Crit Care Med*. 2006 Oct 15;174(8):928-34. Epub 2006 Jul 20. PubMed PMID: 16858014.

772: Chokhani R, Pathak V. DOTS centre at a tertiary care teaching hospital.

*Nepal Med Coll J*. 2006 Mar;8(1):19-21. PubMed PMID: 16827084.

773: Verster JC, Veldhuijzen DS, Volkerts ER. Effects of an opioid (oxycodone/paracetamol) and an NSAID (bromfenac) on driving ability, memory

functioning, psychomotor performance, pupil size, and mood. *Clin J Pain*. 2006

Jun;22(5):499-504. PubMed PMID: 16772806.

774: Kobashi Y, Matsushima T, Oka M. A double-blind randomized study of

aminoglycoside infusion with combined therapy for pulmonary *Mycobacterium avium*

complex disease. *Respir Med*. 2007 Jan;101(1):130-8. Epub 2006 Jun 5. PubMed PMID:

16750618.

775: Tada A, Kawata N, Shibayama T, Takahashi S, Hirano A, Kimura G, Takeuchi M,

Okada C, Soda R, Takahashi K. [In vitro antituberculous activity of ofloxacin and levofloxacin against multidrug-resistant tuberculosis and clinical outcomes].

*Kekkaku*. 2006 Apr;81(4):337-44. Japanese. PubMed PMID: 16715942.

776: Burman WJ, Goldberg S, Johnson JL, Muzanye G, Engle M, Mosher AW, Choudhri

S, Daley CL, Munsiff SS, Zhao Z, Vernon A, Chaisson RE. Moxifloxacin versus

ethambutol in the first 2 months of treatment for pulmonary tuberculosis. *Am J*

*Respir Crit Care Med*. 2006 Aug 1;174(3):331-8. Epub 2006 May 4. PubMed PMID:

16675781.

777: Holtz TH, Sternberg M, Kammerer S, Laserson KF, Riekstina V, Zarovska E,

Skripconoka V, Wells CD, Leimane V. Time to sputum culture conversion in

multidrug-resistant tuberculosis: predictors and relationship to treatment outcome. *Ann Intern Med.* 2006 May 2;144(9):650-9. PubMed PMID: 16670134.

778: Vlassov VV, MacLehose HG. Low level laser therapy for treating tuberculosis. *Cochrane Database Syst Rev.* 2006 Apr 19;(2):CD003490. Review. PubMed PMID: 16625582.

779: Monteon ML, Arcari CM, Remington PL, Kanarek MS, Oemig TV. Tuberculosis cases in Wisconsin: documentation of treatment improvement and completion of treatment, 2000-2002. *J Public Health Manag Pract.* 2006 May-Jun;12(3):254-61. PubMed PMID: 16614561.

780: Silverman M, Sheffer AL, D'Áz PV, Lindberg B. Safety and tolerability of inhaled budesonide in children in the Steroid Treatment As Regular Therapy in early asthma (START) trial. *Pediatr Allergy Immunol.* 2006 May;17 Suppl 17:14-20. PubMed PMID: 16573704.

781: Tao Y, Ninomiya K, Miyazaki M, Iwanaga T, Toshihiko I, Ootsu T, Takigawa S, Kawakami K, Kawabata M, Higashi K. [Clinical analysis of cases with multidrug-resistant tuberculosis--inpatients at National Hospitals in Kyushu between 1998 and 2003]. *Kekkaku.* 2006 Jan;81(1):1-5. Japanese. PubMed PMID: 16479994.

782: Nursyam EW, Amin Z, Rumende CM. The effect of vitamin D as supplementary treatment in patients with moderately advanced pulmonary tuberculous lesion. *Acta Med Indones.* 2006 Jan-Mar;38(1):3-5. PubMed PMID: 16479024.

783: Davydov L, Ebert SC, Restino M, Gardner M, Bedenkop G, Uchida KM, Bertino JS Jr. Prospective evaluation of the treatment and outcome of community-acquired pneumonia according to the Pneumonia Severity Index in VHA hospitals. *Diagn Microbiol Infect Dis.* 2006 Apr;54(4):267-75. Epub 2006 Feb 8. PubMed PMID:

16466891.

784: Singla R, Khan N, Al-Sharif N, Ai-Sayegh MO, Shaikh MA, Osman MM. Influence of diabetes on manifestations and treatment outcome of pulmonary TB patients. *Int J Tuberc Lung Dis*. 2006 Jan;10(1):74-9. PubMed PMID: 16466041.

785: Francois Venter WD, Panz VR, Feldman C, Joffe BI. Adrenocortical function in hospitalised patients with active pulmonary tuberculosis receiving a rifampicin-based regimen -- a pilot study. *S Afr Med J*. 2006 Jan;96(1):62-6. PubMed PMID: 16440115.

786: Schiff MH, Burmester GR, Kent JD, Pangan AL, Kupper H, Fitzpatrick SB, Donovan C. Safety analyses of adalimumab (HUMIRA) in global clinical trials and US postmarketing surveillance of patients with rheumatoid arthritis. *Ann Rheum Dis*. 2006 Jul;65(7):889-94. Epub 2006 Jan 26. PubMed PMID: 16439435; PubMed Central PMCID: PMC1798196.

787: Fujikane T, Fujiuchi S, Yamazaki Y, Sato M, Yamamoto Y, Takeda A, Nishigaki Y, Fujita Y, Shimizu T. Efficacy and outcomes of clarithromycin treatment for pulmonary MAC disease. *Int J Tuberc Lung Dis*. 2005 Nov;9(11):1281-7. PubMed PMID: 16333938.

788: Mikami A, Toyota E, Ishizuka N, Morino E, Naka G, Yoshizawa A, Houjo M, Kawana A, Kobayashi N, Keicho N, Kudo K. [Impact of the change in criteria for hospital discharge of patients with tuberculosis based on the duration of hospitalization]. *Kekkaku*. 2005 Oct;80(10):631-6. Japanese. PubMed PMID: 16296390.

789: SchÃ¶n T, Wolday D, Elias D, Melese E, Moges F, Tessema T, Stendahl O, Sundqvist T, Britton S. Kinetics of sedimentation rate, viral load and TNF-alpha in relation to HIV co-infection in tuberculosis. *Trans R Soc Trop Med Hyg*. 2006 May;100(5):483-8. Epub 2005 Oct 20. PubMed PMID: 16242741.

790: Fairall LR, Zwarenstein M, Bateman ED, Bachmann M, Lombard C, Majara BP, Joubert G, English RG, Bheekie A, van Rensburg D, Mayers P, Peters AC, Chapman RD. Effect of educational outreach to nurses on tuberculosis case detection and primary care of respiratory illness: pragmatic cluster randomised controlled trial. *BMJ*. 2005 Oct 1;331(7519):750-4. Erratum in: *BMJ*. 2005 Nov 12;331(7525):1120. Myers, Pat [corrected to Mayers, Pat]. PubMed PMID: 16195293; PubMed Central PMCID: PMC1239979.

791: Range N, Andersen AB, Magnussen P, Mugomela A, Friis H. The effect of micronutrient supplementation on treatment outcome in patients with pulmonary tuberculosis: a randomized controlled trial in Mwanza, Tanzania. *Trop Med Int Health*. 2005 Sep;10(9):826-32. PubMed PMID: 16135188.

792: Keus K, Houston S, Melaku Y, Burling S. Field research in humanitarian medical programmes. Treatment of a cohort of tuberculosis patients using the Manyatta regimen in a conflict zone in South Sudan. *Trans R Soc Trop Med Hyg*. 2003 Nov-Dec;97(6):614-8. PubMed PMID: 16134258.

793: Ziganshina LE, Vizel AA, Squire SB. Fluoroquinolones for treating tuberculosis. *Cochrane Database Syst Rev*. 2005 Jul 20;(3):CD004795. Review. Update in: *Cochrane Database Syst Rev*. 2008;(1):CD004795. PubMed PMID: 16034951.

794: Handley DA, Morley J, Vaickus L. Levalbuterol hydrochloride. *Expert Opin Investig Drugs*. 1998 Dec;7(12):2027-41. PubMed PMID: 15991945.

795: Deoskar RB, Sengupta B, Rajan KE, Barthwal MS, Falleiro J, Sharma SK. Study of Drug Resistant Pulmonary Tuberculosis. *Med J Armed Forces India*. 2005 Jul;61(3):245-8. doi: 10.1016/S0377-1237(05)80164-9. Epub 2011 May 30. PubMed PMID: 27407770; PubMed Central PMCID: PMC4925639.

796: Chambers HF, Turner J, Schechter GF, Kawamura M, Hopewell PC. Imipenem for treatment of tuberculosis in mice and humans. *Antimicrob Agents Chemother.* 2005 Jul;49(7):2816-21. PubMed PMID: 15980354; PubMed Central PMCID: PMC1168716.

797: Sherwood JT, Mitchell JD, Pomerantz M. Completion pneumonectomy for chronic mycobacterial disease. *J Thorac Cardiovasc Surg.* 2005 Jun;129(6):1258-65. PubMed PMID: 15942565.

798: LoBue PA, Moser KS. Isoniazid- and rifampin-resistant tuberculosis in San Diego County, California, United States, 1993-2002. *Int J Tuberc Lung Dis.* 2005 May;9(5):501-6. PubMed PMID: 15875920.

799: Nagai H, Inagaki T, Toyoda E, Kawabe Y, Fujiwara K, Masuyama H, Takahashi S. [Tuberculosis and human rights]. *Kekkaku.* 2005 Jan;80(1):31-45. Japanese. PubMed PMID: 15839061.

800: Taga S, Ogawa K, Nakagawa T, Tano M. [The clinical study on efficacy of clarithromycin, levofloxacin, and streptomycin for pulmonary Mycobacterium avium-intracellulare complex infection]. *Kekkaku.* 2005 Jan;80(1):1-7. Japanese. PubMed PMID: 15839056.

801: Ige OM, Sogaolu OM, Odaibo GN, Olaleye OD. Evaluation of modified short course chemotherapy in active pulmonary tuberculosis patients with human immunodeficiency virus infection in University College Hospital, Ibadan, Nigeria--a preliminary report. *Afr J Med Med Sci.* 2004 Sep;33(3):259-62. PubMed PMID: 15819474.

802: Takahara M. [Clinical evaluation of causes of death in patients with pulmonary tuberculosis]. *Kekkaku.* 2004 Dec;79(12):711-6. Japanese. PubMed PMID: 15782616.

803: Abal AT, Jayakrishnan B, Parwer S, El Shamy A, Abahussain E, Sharma PN.  
Effect of cigarette smoking on sputum smear conversion in adults with active pulmonary tuberculosis. *Respir Med.* 2005 Apr;99(4):415-20. PubMed PMID: 15763447.

804: Niazi AD, Al-Delaimi AM. Impact of community participation on treatment outcomes and compliance of DOTS patients in Iraq. *East Mediterr Health J.* 2003 Jul;9(4):709-17. PubMed PMID: 15748068.

805: Mohan A, Nassir H, Niazi A. Does routine home visiting improve the return rate and outcome of DOTS patients who delay treatment? *East Mediterr Health J.* 2003 Jul;9(4):702-8. PubMed PMID: 15748067.

806: Mayanja-Kizza H, Jones-Lopez E, Okwera A, Wallis RS, Ellner JJ, Mugerwa RD, Whalen CC; Uganda-Case Western Research Collaboration. Immunoadjuvant prednisolone therapy for HIV-associated tuberculosis: a phase 2 clinical trial in Uganda. *J Infect Dis.* 2005 Mar 15;191(6):856-65. Epub 2005 Feb 8. PubMed PMID: 15717259; PubMed Central PMCID: PMC4515766.

807: Marras TK. Dexamethasone for tuberculous meningitis. *N Engl J Med.* 2005 Feb 10;352(6):628-30; author reply 628-30. PubMed PMID: 15706646.

808: Singla R, Singla N, Sarin R, Arora VK. Influence of pre-treatment bacillary load on treatment outcome of pulmonary tuberculosis patients receiving DOTS under revised national tuberculosis control programme. *Indian J Chest Dis Allied Sci.* 2005 Jan-Mar;47(1):19-23. PubMed PMID: 15704711.

809: Murhekar MV, Kolappan C, Gopi PG, Chakraborty AK, Sehgal SC. Tuberculosis situation among tribal population of Car Nicobar, India, 15 years after intensive tuberculosis control project and implementation of a national tuberculosis programme. *Bull World Health Organ.* 2004 Nov;82(11):836-43. Epub 2004 Dec 14. PubMed PMID: 15640919; PubMed Central PMCID: PMC2623056.

810: Shirai M, Hayakawa H, Nakano Y, Kuroishi S, Nakano Y, Todate A, Suda T, Chida K. [Outcome of pulmonary Mycobacterium avium complex (MAC) disease treated with clarithromycin (CAM)-containing regimens]. Nihon Kokyuki Gakkai Zasshi. 2004 Oct;42(10):875-9. Japanese. PubMed PMID: 15566000.

811: Nix DE, Adam RD, Auclair B, Krueger TS, Godo PG, Peloquin CA. Pharmacokinetics and relative bioavailability of clofazimine in relation to food, orange juice and antacid. Tuberculosis (Edinb). 2004;84(6):365-73. PubMed PMID: 15525560.

812: Daniel OJ, Salako AA, Oluwole FA, Alausa OK, Oladapo OT. HIV sero-prevalence among newly diagnosed adult pulmonary tuberculosis patients in Sagamu. Niger J Med. 2004 Oct-Dec;13(4):393-7. PubMed PMID: 15523868.

813: Thwaites GE, Nguyen DB, Nguyen HD, Hoang TQ, Do TT, Nguyen TC, Nguyen QH, Nguyen TT, Nguyen NH, Nguyen TN, Nguyen NL, Nguyen HD, Vu NT, Cao HH, Tran TH, Pham PM, Nguyen TD, Stepniewska K, White NJ, Tran TH, Farrar JJ. Dexamethasone for the treatment of tuberculous meningitis in adolescents and adults. N Engl J Med. 2004 Oct 21;351(17):1741-51. PubMed PMID: 15496623.

814: Tob n A, Paniagua L, Henao M, Arcila V, Maya J, Bedoya F, Mu toz B. [Surgical treatment of multiresistant lung tuberculosis]. Biomedica. 2004 Jun;24 Supp 1:65-72. Spanish. PubMed PMID: 15495573.

815: Roth DE, Soto G, Arenas F, Bautista CT, Ortiz J, Rodriguez R, Cabrera L, Gilman RH. Association between vitamin D receptor gene polymorphisms and response to treatment of pulmonary tuberculosis. J Infect Dis. 2004 Sep 1;190(5):920-7. Epub 2004 Jul 29. PubMed PMID: 15295697.

816: Elliott AM, Luzze H, Quigley MA, Nakiyingi JS, Kyaligonza S, Namujju PB,

Ducar C, Ellner JJ, Whitworth JA, Mugerwa R, Johnson JL, Okwera A. A randomized, double-blind, placebo-controlled trial of the use of prednisolone as an adjunct to treatment in HIV-1-associated pleural tuberculosis. *J Infect Dis.* 2004 Sep 1;190(5):869-78. Epub 2004 Jul 29. PubMed PMID: 15295690.

817: Ito K, Takahashi M, Yoshiyama T, Wada M, Ogata H. [Multi-drug resistant lung tuberculosis due to double infection of MDR strain]. *Kekkaku.* 2004 Jun;79(6):387-90. Japanese. PubMed PMID: 15293752.

818: Strang JI, Nunn AJ, Johnson DA, Casbard A, Gibson DG, Girling DJ. Management of tuberculous constrictive pericarditis and tuberculous pericardial effusion in Transkei: results at 10 years follow-up. *QJM.* 2004 Aug;97(8):525-35. PubMed PMID: 15256610.

819: Moriwaki A, Hagimoto N, Wataya H, Yoshimi M, Nakashima N, Maeyama T, Kuwano K, Nakanishi Y. [A case of rapidly deteriorated pulmonary aspergillosis with various clinical manifestations]. *Nihon Kokyuki Gakkai Zasshi.* 2004 Jun;42(6):491-5. Japanese. PubMed PMID: 15228135.

820: Patel N, Trapathi SB. Improved cure rates in pulmonary tuberculosis category II (retreatment) with mycobacterium w. *J Indian Med Assoc.* 2003 Nov;101(11):680, 682. PubMed PMID: 15198421.

821: Condos R, Hull FP, Schluger NW, Rom WN, Smaldone GC. Regional deposition of aerosolized interferon-gamma in pulmonary tuberculosis. *Chest.* 2004 Jun;125(6):2146-55. PubMed PMID: 15189935.

822: Schoeman JF, Springer P, van Rensburg AJ, Swanevelder S, Hanekom WA, Haslett PA, Kaplan G. Adjunctive thalidomide therapy for childhood tuberculous meningitis: results of a randomized study. *J Child Neurol.* 2004 Apr;19(4):250-7. PubMed PMID: 15163089.

823: Ziboh VA, Naguwa S, Vang K, Wineinger J, Morrissey BM, Watnik M, Gershwin

ME. Suppression of leukotriene B4 generation by ex-vivo neutrophils isolated from asthma patients on dietary supplementation with gammalinolenic acid-containing borage oil: possible implication in asthma. Clin Dev Immunol. 2004 Mar;11(1):13-21. PubMed PMID: 15154607; PubMed Central PMCID: PMC2275406.

824: Zheng XM, Li SM, Xing BC. [Short-term effect of treatment protocol utilizing levofloxacin, pasiniazide and M. Vaccae on multi- drug resistant pulmonary tuberculosis]. Di Yi Jun Yi Da Xue Xue Bao. 2004 May;24(5):574-5, 578. Chinese. PubMed PMID: 15151838.

825: Arpaz S, Keskin S, Kiter G, Sezgin N, Budin D, Algan A, CaliÅYir HC. [Evaluation of Nazilli Tuberculosis Dispensary activities executed between June 1996-May 2000: Pre-DOT situation]. Tuberk Toraks. 2003;51(3):289-97. Turkish. PubMed PMID: 15143408.

826: Tariq SM, Tariq S. Empirical treatment for tuberculosis: survey of cases treated over 2 years in a London area. J Pak Med Assoc. 2004 Feb;54(2):88-95. PubMed PMID: 15134210.

827: Wallis RS, Kyambadde P, Johnson JL, Horter L, Kittle R, Pohle M, Ducar C, Millard M, Mayanja-Kizza H, Whalen C, Okwera A. A study of the safety, immunology, virology, and microbiology of adjunctive etanercept in HIV-1-associated tuberculosis. AIDS. 2004 Jan 23;18(2):257-64. PubMed PMID: 15075543.

828: Kobashi Y, Matsushima T. Comparison of clinical features in patients with pulmonary Mycobacterium-avium complex (MAC) disease treated before and after proposal for guidelines. J Infect Chemother. 2004 Feb;10(1):25-30. PubMed PMID: 14991514.

829: Huang XR, Gao WW, Zhang XX, Wang SM, Pan YX, Ma Y. [A preliminary study on

the definition of resistant breakpoints of ofloxacin and levofloxacin for *Mycobacterium tuberculosis*]. *Zhonghua Jie He He Hu Xi Za Zhi*. 2004 Feb;27(2):84-8. Chinese. PubMed PMID: 14990180.

830: Visweswaraiiah NK, Telles S. Randomized trial of yoga as a complementary therapy for pulmonary tuberculosis. *Respirology*. 2004 Mar;9(1):96-101. PubMed PMID: 14982609.

831: Stanford J, Stanford C, Grange J. Immunotherapy with *Mycobacterium vaccae* in the treatment of tuberculosis. *Front Biosci*. 2004 May 1;9:1701-19. Review. PubMed PMID: 14977580.

832: Goerke C, Matias y Papenberg S, Dasbach S, Dietz K, Ziebach R, Kahl BC, Wolz C. Increased frequency of genomic alterations in *Staphylococcus aureus* during chronic infection is in part due to phage mobilization. *J Infect Dis*. 2004 Feb 15;189(4):724-34. Epub 2004 Jan 29. PubMed PMID: 14767828.

833: Richardus JH, Withington SG, Anderson AM, Croft RP, Nicholls PG, Van Brakel WH, Smith WC. Adverse events of standardized regimens of corticosteroids for prophylaxis and treatment of nerve function impairment in leprosy: results from the 'TRIPOD' trials. *Lepr Rev*. 2003 Dec;74(4):319-27. PubMed PMID: 14750577.

834: Sasaki Y, Yamagishi F, Yagi T, Itakura M, Fujikawa A, Kuga M, Ishimaru T. [A study on pulmonary tuberculosis retreatment cases]. *Kekkaku*. 2003 Dec;78(12):723-32. Japanese. Erratum in: *Kekkaku*. 2004 Apr;79(4):43. PubMed PMID: 14733112.

835: Hoheisel G, Vogtmann M, Chan KS, Luk WK, Chan CH. [Pleuritis tuberculosa - therapeutic value of repeated chest tapping]. *Pneumologie*. 2004 Jan;58(1):23-7. German. PubMed PMID: 14732896.

836: [Pneumoconiosis and mycobacterial infection]. *Kekkaku*. 2003 Nov;78(11):711-5. Japanese. PubMed PMID: 14672049.

837: Long R, Bochar K, Chomyc S, Talbot J, Barrie J, Kunimoto D, Tilley P.  
Relative versus absolute noncontagiousness of respiratory tuberculosis on treatment. *Infect Control Hosp Epidemiol*. 2003 Nov;24(11):831-8. PubMed PMID: 14649771.

838: Saito W, Nagayama N, Miyamoto M, Hara H, Suzuki J, Masuda K, Baba M, Tamura A, Nagai H, Akagawa S, Kawabe Y, Machida K, Kurashima A, Yotsumoto H.  
[Characteristics and treatment outcomes of INH-resistant or RFP-resistant tuberculosis]. *Kekkaku*. 2003 Oct;78(10):611-7. Japanese. PubMed PMID: 14621568.

839: Salihi HM, Aliyu MH, Ratard R, Pierre-Louis BJ. Characteristics associated with reported sputum culture conversion in the era of re-emergent *Mycobacterium tuberculosis* in the State of North Carolina, 1993-1998. *Int J Tuberc Lung Dis*. 2003 Nov;7(11):1070-6. PubMed PMID: 14598967.

840: Griffith DE, Brown-Elliott BA, Wallace RJ Jr. Thrice-weekly clarithromycin-containing regimen for treatment of *Mycobacterium kansasii* lung disease: results of a preliminary study. *Clin Infect Dis*. 2003 Nov 1;37(9):1178-82. Epub 2003 Oct 1. PubMed PMID: 14557961.

841: Field SK, Cowie RL. Treatment of *Mycobacterium avium-intracellulare* complex lung disease with a macrolide, ethambutol, and clofazimine. *Chest*. 2003 Oct;124(4):1482-6. PubMed PMID: 14555583.

842: Yew WW, Chan CK, Leung CC, Chau CH, Tam CM, Wong PC, Lee J. Comparative roles of levofloxacin and ofloxacin in the treatment of multidrug-resistant tuberculosis: preliminary results of a retrospective study from Hong Kong. *Chest*. 2003 Oct;124(4):1476-81. PubMed PMID: 14555582.

843: Yang H, Guo K, Shen W, Li Y, Dai M. [Clinical observation of the treatment

of 654-2 injection and "ganxian tui huang recipe" on liver cirrhosis with intractable jaundice]. Zhong Yao Cai. 2003 May;26(5):385-7. Chinese. PubMed PMID: 14535021.

844: Pedral-Sampaio DB, Netto EM, Brites C, Bandeira AC, Guerra C, Barberin MG, Badar<sup>3</sup> R. Use of Rhu-GM-CSF in pulmonary tuberculosis patients: results of a randomized clinical trial. Braz J Infect Dis. 2003 Aug;7(4):245-52. PubMed PMID: 14533985.

845: Chu NH, Zhu LZ, Yie ZZ, Yuan SL, Wang JY, Xu JL, Ma LP. [A controlled clinical study on the efficacy of recombinant human interleukin-2 in the treatment of pulmonary tuberculosis]. Zhonghua Jie He He Hu Xi Za Zhi. 2003 Sep;26(9):548-51. Chinese. PubMed PMID: 14521759.

846: Chen QL, Chen L, Yin JJ. [A study on the clinical efficacy of a combination regimen with levofloxacin and capreomycin in the treatment of multi-drug resistant pulmonary tuberculosis]. Zhonghua Jie He He Hu Xi Za Zhi. 2003 Aug;26(8):454-7. Chinese. PubMed PMID: 14505519.

847: Frieden TR, Khatri GR. Impact of national consultants on successful expansion of effective tuberculosis control in India. Int J Tuberc Lung Dis. 2003 Sep;7(9):837-41. PubMed PMID: 12971666.

848: Miti S, Mfungwe V, Reijer P, Maher D. Integration of tuberculosis treatment in a community-based home care programme for persons living with HIV/AIDS in Ndola, Zambia. Int J Tuberc Lung Dis. 2003 Sep;7(9 Suppl 1):S92-8. PubMed PMID: 12971660.

849: Salaniponi FM, Gausi F, Mphasa N, Nyirenda TE, Kwanjana JH, Harries AD. Decentralisation of treatment for patients with tuberculosis in Malawi: moving from research to policy and practice. Int J Tuberc Lung Dis. 2003 Sep;7(9 Suppl

1):S38-47. PubMed PMID: 12971653.

850: Arora VK, Singla N, Sarin R. Profile of geriatric patients under DOTS in Revised National Tuberculosis Control Programme. Indian J Chest Dis Allied Sci. 2003 Oct-Dec;45(4):231-5. PubMed PMID: 12962456.

851: Yokoyama T, Rikimaru T, Gohara R, Sueyasu Y, Aizawa H. [Tuberculosis in elderly]. Kekkaku. 2003 Jul;78(7):479-82. Japanese. PubMed PMID: 12931644.

852: Kobashi Y, Matsushima T. The effect of combined therapy according to the guidelines for the treatment of Mycobacterium avium complex pulmonary disease. Intern Med. 2003 Aug;42(8):670-5. PubMed PMID: 12924489.

853: Alsedã M, Godoy P. [Study investigating infection in contacts of tuberculosis patients in a semi-urban area]. Enferm Infecc Microbiol Clin. 2003 Jun-Jul;21(6):281-6. Spanish. PubMed PMID: 12809581.

854: Aliyu MH, Salihu HM, Ratard R. HIV infection and sputum-culture conversion in patients diagnosed with Mycobacterium tuberculosis: a population-based study. Wien Klin Wochenschr. 2003 May 30;115(10):340-6. PubMed PMID: 12800448.

855: Xu WG, Gao Z, Fan BD. [Follow-up observation on relapse of smear negative pulmonary tuberculosis after short-course chemotherapy]. Zhonghua Jie He He Hu Xi Za Zhi. 2003 Feb;26(2):74-6. Chinese. PubMed PMID: 12783655.

856: Gravendeel JM, Asapa AS, Becx-Bleumink M, Vrakking HA. Preliminary results of an operational field study to compare side-effects, complaints and treatment results of a single-drug short-course regimen with a four-drug fixed-dose combination (4FDC) regimen in South Sulawesi, Republic of Indonesia. Tuberculosis (Edinb). 2003;83(1-3):183-6. PubMed PMID: 12758210.

857: Domínguez-Castellano A, Muniain MA, Rodríguez-Baño J, García M, Rios MJ, Galvez J, Perez-Cano R. Factors associated with time to sputum smear conversion in active pulmonary tuberculosis. *Int J Tuberc Lung Dis*. 2003 May;7(5):432-8. PubMed PMID: 12757043.

858: Subhash HS, Ashwin I, Jesudason MV, Abharam OC, John G, Cherian AM, Thomas K. Clinical characteristics and treatment response among patients with multidrug-resistant tuberculosis: a retrospective study. *Indian J Chest Dis Allied Sci*. 2003 Apr-Jun;45(2):97-103. PubMed PMID: 12715931.

859: Johnson JL, Ssekasanvu E, Okwera A, Mayanja H, Hirsch CS, Nakibali JG, Jankus DD, Eisenach KD, Boom WH, Ellner JJ, Mugerwa RD; Uganda-Case Western Reserve University Research Collaboration. Randomized trial of adjunctive interleukin-2 in adults with pulmonary tuberculosis. *Am J Respir Crit Care Med*. 2003 Jul 15;168(2):185-91. Epub 2003 Apr 17. PubMed PMID: 12702550.

860: Puri MM, Arora VK. Role of gallium arsenide laser irradiation at 890 nm as an adjunctive to anti-tuberculosis drugs in the treatment of pulmonary tuberculosis. *Indian J Chest Dis Allied Sci*. 2003 Jan-Mar;45(1):19-23. PubMed PMID: 12683708.

861: Kobashi Y, Matsushima T. Clinical analysis of pulmonary *Mycobacterium avium* complex disease in association with corticosteroid treatment. *J Infect Chemother*. 2003 Mar;9(1):68-74. PubMed PMID: 12673411.

862: Schön T, Elias D, Moges F, Melese E, Tessema T, Stendahl O, Britton S, Sundqvist T. Arginine as an adjuvant to chemotherapy improves clinical outcome in active tuberculosis. *Eur Respir J*. 2003 Mar;21(3):483-8. PubMed PMID: 12662006.

863: Smego RA, Ahmed N. A systematic review of the adjunctive use of systemic

corticosteroids for pulmonary tuberculosis. *Int J Tuberc Lung Dis.* 2003 Mar;7(3):208-13. Review. PubMed PMID: 12661833.

864: Beena S, Rao KN, Pai MR. Comparative evaluation of efficacy and safety profile of three anti-tuberculous regimens in Mangalore. *Indian J Med Sci.* 2002 Jul;56(7):315-20. PubMed PMID: 12645166.

865: Lwilla F, Schellenberg D, Masanja H, Acosta C, Galindo C, Aponte J, Egwaga S, Njako B, Ascaso C, Tanner M, Alonso P. Evaluation of efficacy of community-based vs. institutional-based direct observed short-course treatment for the control of tuberculosis in Kilombero district, Tanzania. *Trop Med Int Health.* 2003 Mar;8(3):204-10. PubMed PMID: 12631309.

866: Tripathy SN, Tripathy SN. Tuberculosis and pregnancy. *Int J Gynaecol Obstet.* 2003 Mar;80(3):247-53. PubMed PMID: 12628525.

867: Niu HR, Lai ZH, Yuan L. [Observation on effect of supplementary treatment by Astragalus injection in treating senile pulmonary tuberculosis patients]. *Zhongguo Zhong Xi Yi Jie He Za Zhi.* 2001 May;21(5):349-50. Chinese. PubMed PMID: 12577419.

868: Hutchison DC, Drobniewski FA, Milburn HJ. Management of multiple drug-resistant tuberculosis. *Respir Med.* 2003 Jan;97(1):65-70. PubMed PMID: 12556013.

869: Wallis RS, Vinhas SA, Johnson JL, Ribeiro FC, Palaci M, Peres RL, SÃ; RT, Dietze R, Chiunda A, Eisenach K, Ellner JJ. Whole blood bactericidal activity during treatment of pulmonary tuberculosis. *J Infect Dis.* 2003 Jan 15;187(2):270-8. Epub 2003 Jan 6. PubMed PMID: 12552451.

870: Chen CX, Guo SM, Liu B, Yang JH, Xu N, Liu KW. [Glycocorticosteroid administration prevents fulminant hepatic failure occurrence in patients with

chronic hepatitis B of severe degree]. Zhonghua Gan Zang Bing Za Zhi. 2003 Jan;11(1):37-9. Chinese. PubMed PMID: 12546741.

871: Schillinger JA, Kissinger P, Calvet H, Whittington WL, Ransom RL, Sternberg MR, Berman SM, Kent CK, Martin DH, Oh MK, Handsfield HH, Bolan G, Markowitz LE, Fortenberry JD. Patient-delivered partner treatment with azithromycin to prevent repeated Chlamydia trachomatis infection among women: a randomized, controlled trial. Sex Transm Dis. 2003 Jan;30(1):49-56. PubMed PMID: 12514443.

872: Noeske J, Nguenke PN. Impact of resistance to anti-tuberculosis drugs on treatment outcome using World Health Organization standard regimens. Trans R Soc Trop Med Hyg. 2002 Jul-Aug;96(4):429-33. PubMed PMID: 12497982.

873: Su WJ, Perng RP. Fixed-dose combination chemotherapy (Rifater/Rifinah) for active pulmonary tuberculosis in Taiwan: a two-year follow-up. Int J Tuberc Lung Dis. 2002 Nov;6(11):1029-32. PubMed PMID: 12475151.

874: Fraser HS, Jazayeri D, Mitnick CD, Mukherjee JS, Bayona J. Informatics tools to monitor progress and outcomes of patients with drug resistant tuberculosis in Peru. Proc AMIA Symp. 2002:270-4. PubMed PMID: 12463829; PubMed Central PMCID: PMC2244209.

875: Wang L, Cai Y, Cheng Q, Hu Y, Xiao H. [Imbalance of Th1/Th2 cytokines in patients with pulmonary tuberculosis]. Zhonghua Jie He He Hu Xi Za Zhi. 2002 Sep;25(9):535-7. Chinese. PubMed PMID: 12423561.

876: Patel N, Deshpande MM, Shah M. Effect of an immunomodulator containing Mycobacterium w on sputum conversion in pulmonary tuberculosis. J Indian Med Assoc. 2002 Mar;100(3):191-3. PubMed PMID: 12408283.

877: Yamagishi F, Sasaki Y, Kawabe Y, Toyoda E, Inuzuka K, Yamashita T, Mori T.

[The present situation of daily life of tuberculosis patients treated in hospitals with beds for tuberculosis in Japan]. Kekkaku. 2002 Sep;77(9):609-14. Japanese. PubMed PMID: 12397709.

878: Aksamit TR. Mycobacterium avium complex pulmonary disease in patients with pre-existing lung disease. Clin Chest Med. 2002 Sep;23(3):643-53. Review. PubMed PMID: 12371000.

879: HIV does not increase infectivity of M. tuberculosis. AIDS Wkly. 2000 Feb 14;2-3. PubMed PMID: 12295705.

880: Il'ina T Ia, Zhangireev AA, Perzadaeva KA, Sidorenko OA. [Results of introduction of extended WHO program for detection and treatment of patients with tuberculosis of the respiratory organs]. Probl Tuberk. 2002;(6):15-8. Russian. PubMed PMID: 12227042.

881: Kobashi Y, Okimoto N, Matsushima T, Shigetou E, Kuraoka T, Takeyama H, Eda R, Yano S, Kobayashi K, Ohnishi T, Mori K, Ueda Y, Moritaka T, Nishimura K, Abe T. [Effect of combined chemotherapy following the guidelines on treatment for Mycobacterium avium complex pulmonary disease]. Kekkaku. 2002 Jun;77(6):435-41. Japanese. PubMed PMID: 12136597.

882: Singla R, Al-Sharif N, Al-Sayegh MO, Osman MM, Shaikh MA. Influence of anti-tuberculosis drug resistance on the treatment outcome of pulmonary tuberculosis patients receiving DOTS in Riyadh, Saudi Arabia. Int J Tuberc Lung Dis. 2002 Jul;6(7):585-91. PubMed PMID: 12102297.

883: Ribeiro-Rodrigues R, Resende Co T, Johnson JL, Ribeiro F, Palaci M, SÃ; RT, Maciel EL, Pereira Lima FE, Dettoni V, Toossi Z, Boom WH, Dietze R, Ellner JJ, Hirsch CS. Sputum cytokine levels in patients with pulmonary tuberculosis as early markers of mycobacterial clearance. Clin Diagn Lab Immunol. 2002

Jul;9(4):818-23. PubMed PMID: 12093679; PubMed Central PMCID: PMC120011.

884: van Crevel R, Alisjahbana B, de Lange WC, Borst F, Danusantoso H, van der Meer JW, Burger D, Nelwan RH. Low plasma concentrations of rifampicin in tuberculosis patients in Indonesia. *Int J Tuberc Lung Dis.* 2002 Jun;6(6):497-502. PubMed PMID: 12068982.

885: Sevim T, Ataş G, Gökçe G, Tırnakçıoğlu I, Aksoy E, Gemci, Tahaoglu K. Treatment outcome of relapse and defaulter pulmonary tuberculosis patients. *Int J Tuberc Lung Dis.* 2002 Apr;6(4):320-5. PubMed PMID: 11936741.

886: Sundaram V, Fujiwara PI, Driver CR, Osahan SS, Munsiff SS. Yield of continued monthly sputum evaluation among tuberculosis patients after culture conversion. *Int J Tuberc Lung Dis.* 2002 Mar;6(3):238-45. PubMed PMID: 11934142.

887: Ruohonen RP, Goloubeva TM, Trnka L, Fomin MM, Zhemkova GA, Sinitsyn AV, Lichachev AA, Koskela KG. Implementation of the DOTS strategy for tuberculosis in the Leningrad Region, Russian Federation (1998-1999). *Int J Tuberc Lung Dis.* 2002 Mar;6(3):192-7. PubMed PMID: 11934136.

888: Filho LA, Kritski AL, Salles CL, Sardella IG, Silva MG, Fonseca LS, Saad MH. Mycobacterium tuberculosis typing: usefulness of DRE-PCR to confirm cross-contamination in the mycobacteriology laboratory of a general reference hospital for AIDS. *Int J Tuberc Lung Dis.* 2002 Feb;6(2):150-4. PubMed PMID: 11931414.

889: Park SK, Lee CM, Heu JP, Song SD. A retrospective study for the outcome of pulmonary resection in 49 patients with multidrug-resistant tuberculosis. *Int J Tuberc Lung Dis.* 2002 Feb;6(2):143-9. PubMed PMID: 11931413.

890: Vranken R, Coulombier D, Kenyon T, Koosimile B, Mavunga T, Coggin W, Binkin

N. Use of a computerized tuberculosis register for automated generation of case finding, sputum conversion, and treatment outcome reports. *Int J Tuberc Lung Dis.* 2002 Feb;6(2):111-20. PubMed PMID: 11931409.

891: Sevim T, Aksoy E, AtaÅ§ G, Ozmen I, Kapakli N, Horzum G, Ongel A, TÅrÅn T, Tahaoglu K. Treatment adherence of 717 patients with tuberculosis in a social security system hospital in Istanbul, Turkey. *Int J Tuberc Lung Dis.* 2002 Jan;6(1):25-31. PubMed PMID: 11931397.

892: Karyadi E, West CE, Schultink W, Nelwan RH, Gross R, Amin Z, Dolmans WM, Schlebusch H, van der Meer JW. A double-blind, placebo-controlled study of vitamin A and zinc supplementation in persons with tuberculosis in Indonesia: effects on clinical response and nutritional status. *Am J Clin Nutr.* 2002 Apr;75(4):720-7. PubMed PMID: 11916759.

893: Pungrassami P, Johnsen SP, Chongsuvivatwong V, Olsen J. Has directly observed treatment improved outcomes for patients with tuberculosis in southern Thailand? *Trop Med Int Health.* 2002 Mar;7(3):271-9. PubMed PMID: 11903990.

894: Chierakul N, Chaiprasert A, Tingtoy N, Arjratanakul W, Pattanakitsakul SN. Can serial qualitative polymerase chain reaction monitoring predict outcome of pulmonary tuberculosis treatment? *Respirology.* 2001 Dec;6(4):305-9. PubMed PMID: 11844121.

895: Shiraishi Y, Nakajima Y, Takasuna K, Hanaoka T, Katsuragi N, Konno H. Surgery for Mycobacterium avium complex lung disease in the clarithromycin era. *Eur J Cardiothorac Surg.* 2002 Feb;21(2):314-8. PubMed PMID: 11825742.

896: Wang W, Jin G, Ye Y, Xia X, Wang A, Zhuang Y, Li G, Sun H, Wang Z, Lin M, Chen H, Li J, Dan Z, Zhang X. [A clinical study on vaccine of Mycobacterium

vaccae in treating pulmonary tuberculosis]. Zhonghua Jie He He Hu Xi Za Zhi. 1999 Feb;22(2):108-10. Chinese. PubMed PMID: 11820954.

897: Shigetoh E, Murakami I, Yokosaki Y, Kurimoto N. [Treatment outcomes of multidrug-resistant tuberculosis--comparison between success and failure cases]. Kekkaku. 2001 Dec;76(12):723-8. Japanese. PubMed PMID: 11806128.

898: Luo Y; National Cooperation Group On Clinical Study Of Mycobacterium Vaccae Vaccine. [The immunotherapeutic effect of Mycobacterium vaccae vaccine on initially treated pulmonary tuberculosis]. Zhonghua Jie He He Hu Xi Za Zhi. 2001 Jan;24(1):43-7. Chinese. PubMed PMID: 11802939.

899: Feng H, Du B, Dong Z. [Study on pathogenicity of sputum from cavity of sputum negative patients with pulmonary tuberculosis after short course chemotherapy]. Zhonghua Jie He He Hu Xi Za Zhi. 2000 Sep;23(9):559-62. Chinese. PubMed PMID: 11778533.

900: Luo Y, Lu S, Guo S. [Immunotherapeutic effect of Mycobacterium vaccae on multi-drug resistant pulmonary tuberculosis]. Zhonghua Jie He He Hu Xi Za Zhi. 2000 Feb;23(2):85-8. Chinese. PubMed PMID: 11778496.

901: Lu Y, Zhu L, Duan L. [Antituberculosis effect of levofloxacin]. Zhonghua Jie He He Hu Xi Za Zhi. 2000 Jan;23(1):50-4. Chinese. PubMed PMID: 11778184.

902: Wei C, Yu H, Zhang R. [Cleaning cavity operation in treating relapse bacillary cavitary pulmonary tuberculosis]. Zhonghua Jie He He Hu Xi Za Zhi. 1999 Sep;22(9):562-3. Chinese. PubMed PMID: 11776773.

903: Xia X, Gui X. [Clinical analysis of 96 cases with pulmonary disease caused by nontuberculous mycobacteria]. Zhonghua Jie He He Hu Xi Za Zhi. 1999 Apr;22(4):239-41. Chinese. PubMed PMID: 11775923.

904: Yu D, Wang J, Hu X. [Clinical research of pasinizid on retreated sputum positive pulmonary tuberculosis in senilities]. Zhonghua Jie He He Hu Xi Za Zhi. 2001 Oct;24(10):608-10. Chinese. PubMed PMID: 11770424.

905: Schoeman JF, Elshof JW, Laubscher JA, Janse van Rensburg A, Donald PR. The effect of adjuvant steroid treatment on serial cerebrospinal fluid changes in tuberculous meningitis. Ann Trop Paediatr. 2001 Dec;21(4):299-305. PubMed PMID: 11732147.

906: Nakano N, Hirayama T, Abe M, Nishimura K, Imachi T. [Surgical management of non-tuberculous mycobacteriosis and tuberculosis of the lung]. Kekkaku. 2001 Oct;76(10):649-56. Japanese. PubMed PMID: 11712385.

907: Tamura M, Shirayama R, Kasahara R, Miyazaki R, Yoshikawa M, Tsukaguchi K, Yoneda T, Narita N. [A study on relation between active pulmonary tuberculosis and underlying diseases]. Kekkaku. 2001 Sep;76(9):619-24. Japanese. PubMed PMID: 11676119.

908: Franco J, Camarena JJ, Nogueira JM, Blanquer R, Ruiz MJ, MarÃ-n J. Serological response (Western blot) to fractions of Mycobacterium tuberculosis sonicate antigen in tuberculosis patients and contacts. Int J Tuberc Lung Dis. 2001 Oct;5(10):958-62. PubMed PMID: 11605891.

909: Becx-Bleumink M, Wibowo H, Apriani W, Vrakking H. High tuberculosis notification and treatment success rates through community participation in central Sulawesi, Republic of Indonesia. Int J Tuberc Lung Dis. 2001 Oct;5(10):920-5. PubMed PMID: 11605885.

910: Cattaneo C. Neltenexine tablets in smoking and non-smoking patients with COPD. A double-blind, randomised, controlled study versus placebo. Minerva Med. 2001 Aug;92(4):277-84. PubMed PMID: 11535971.

911: Fadda G. Oral neltenexine in patients with obstructive airways diseases: an open, randomised, controlled comparison versus sobrerol. *Minerva Med.* 2001 Aug;92(4):269-75. PubMed PMID: 11535970.

912: Mawer C, Ignatenko N, Wares D, Strelis A, Golubchikova V, Yanova G, Lyagoshina T, Sharaburova O, Banatvala N. Comparison of the effectiveness of WHO short-course chemotherapy and standard Russian antituberculous regimens in Tomsk, western Siberia. *Lancet.* 2001 Aug 11;358(9280):445-9. PubMed PMID: 11513907.

913: Linnane SJ, Thin AG, Keatings VM, Moynihan JB, McLoughlin P, FitzGerald MX. Glucocorticoid treatment reduces exhaled nitric oxide in cystic fibrosis patients. *Eur Respir J.* 2001 Jun;17(6):1267-70. PubMed PMID: 11491175.

914: Jiang W, Chen H, Gao J, Huaibei M. [Efficacy of regimens containing INH, RFP with varied chemotherapy courses on retreated culture positive pneumoconio-tuberculosis]. *Zhonghua Jie He He Hu Xi Za Zhi.* 1998 Nov;21(11):648-50. Chinese. PubMed PMID: 11477888.

915: Zhu L, Yan B, Ma W. [Controlled clinical study on efficacy of fixed-dose compounds rifater/rifinah in antituberculous chemotherapy]. *Zhonghua Jie He He Hu Xi Za Zhi.* 1998 Nov;21(11):645-7. Chinese. PubMed PMID: 11477887.

916: Rutta E, Kipingili R, Lukonge H, Assefa S, Mitsilale E, Rwechungura S. Treatment outcome among Rwandan and Burundian refugees with sputum smear-positive tuberculosis in Ngara, Tanzania. *Int J Tuberc Lung Dis.* 2001 Jul;5(7):628-32. PubMed PMID: 11467369.

917: Singla R, Gupta S, Gupta R, Arora VK. Efficacy and safety of sparfloxacin in combination with kanamycin and ethionamide in multidrug-resistant pulmonary tuberculosis patients: preliminary results. *Int J Tuberc Lung Dis.* 2001 Jun;5(6):559-63. PubMed PMID: 11409584.

- 918: Escalante P, Graviss EA, Griffith DE, Musser JM, Awe RJ. Treatment of isoniazid-resistant tuberculosis in southeastern Texas. Chest. 2001 Jun;119(6):1730-6. PubMed PMID: 11399698.
- 919: Ige OM, Bakare NA, Onadeko BO. Modified short-course chemotherapy of pulmonary tuberculosis in Ibadan, Nigeria--a preliminary report. Afr J Med Med Sci. 2000 Mar;29(1):51-3. PubMed PMID: 11379469.
- 920: An S, Fan Y. [Polymerase chain reaction technique in monitoring treatment of bacillary pulmonary tuberculosis]. Zhonghua Jie He He Hu Xi Za Zhi. 1998 Jul;21(7):392-4. Chinese. PubMed PMID: 11326874.
- 921: Chu N, Yan B, Zhu L. [Controlled clinical trial on efficacy of 5-month regimens and whole course intermittent 6-month regimens in treating bacillary pulmonary tuberculosis]. Zhonghua Jie He He Hu Xi Za Zhi. 1998 Jul;21(7):388-91. Chinese. PubMed PMID: 11326873.
- 922: Chiang CY, Yu MC, Bai KJ, Suo J, Lin TP, Lee YC. Pulmonary resection in the treatment of patients with pulmonary multidrug-resistant tuberculosis in Taiwan. Int J Tuberc Lung Dis. 2001 Mar;5(3):272-7. PubMed PMID: 11326827.
- 923: Tu D, Zhang L, Su J. [Resistance and efficacy of treatment in relapse pulmonary tuberculosis]. Zhonghua Jie He He Hu Xi Za Zhi. 2000 Nov;23(11):666-8. Chinese. PubMed PMID: 11225030.
- 924: Wada M. [Effectiveness and problems of PZA-containing 6-month regimen for the treatment of new pulmonary tuberculosis patients]. Kekkaku. 2001 Jan;76(1):33-43. Review. Japanese. PubMed PMID: 11211781.
- 925: Mayo RE, Stanford JL. Double-blind placebo-controlled trial of Mycobacterium vaccae immunotherapy for tuberculosis in KwaZulu, South Africa, 1991-97. Trans R Soc Trop Med Hyg. 2000 Sep-Oct;94(5):563-8. PubMed PMID: 11132390.

926: Desjardin LE, Hehman GL. Quantification of *M. tuberculosis* DNA in Sputum During the Treatment of Pulmonary Tuberculosis. *Methods Mol Med.* 2001;48:121-31.  
doi: 10.1385/1-59259-077-2:121. PubMed PMID: 21374412.

927: Sacks LV, Pendle S, Orlovic D, Andre M, Popara M, Moore G, Thonell L, Hurwitz S. Adjunctive salvage therapy with inhaled aminoglycosides for patients with persistent smear-positive pulmonary tuberculosis. *Clin Infect Dis.* 2001 Jan;32(1):44-9. Epub 2000 Dec 12. PubMed PMID: 11118385.

928: Avendaño M, Goldstein RS. Multidrug-resistant tuberculosis: long term follow-up of 40 non-HIV-infected patients. *Can Respir J.* 2000 Sep-Oct;7(5):383-9.  
PubMed PMID: 11058206.

929: Hiyama J, Marukawa M, Shiota Y, Ono T, Mashiba H. Factors influencing response to treatment of pulmonary tuberculosis. *Acta Med Okayama.* 2000 Aug;54(4):139-45. PubMed PMID: 10985173.

930: Masjedi MR, Jamaati HR, Amin FK, Velayati AA. Detection of *Mycobacterium tuberculosis* in bronchial washing of smear-positive patients after sputum conversion. *Monaldi Arch Chest Dis.* 2000 Jun;55(3):212-5. PubMed PMID: 10948669.

931: Hakim JG, Ternouth I, Mushangi E, Siziya S, Robertson V, Malin A. Double blind randomised placebo controlled trial of adjunctive prednisolone in the treatment of effusive tuberculous pericarditis in HIV seropositive patients. *Heart.* 2000 Aug;84(2):183-8. PubMed PMID: 10908256; PubMed Central PMCID: PMC1760932.

932: Zhangireev AA, Ismailov ShSh, Berikova EM. [New cases of pulmonary tuberculosis treatment within DOTS strategy]. *Probl Tuberk.* 2000; (3):23-5.  
Russian. PubMed PMID: 10900979.

933: Mishkinis K, KaminskaÄ-te A, Purvanetskene B. [Treatment of multidrug resistant tuberculosis in Santakiskes tuberculosis hospital]. Probl Tuberk. 2000;(3):9-11. Russian. PubMed PMID: 10900974.

934: Sousa AO, Wargnier A, Poinsignon Y, Simonney N, Gerber F, Lavergne F, Herrmann JL, Lagrange PH. Kinetics of circulating antibodies, immune complex and specific antibody-secreting cells in tuberculosis patients during 6 months of antimicrobial therapy. Tuber Lung Dis. 2000;80(1):27-33. PubMed PMID: 10897381.

935: Lawn SD, Obeng J, Acheampong JW, Griffin GE. Resolution of the acute-phase response in West African patients receiving treatment for pulmonary tuberculosis. Int J Tuberc Lung Dis. 2000 Apr;4(4):340-4. PubMed PMID: 10777083.

936: Banerjee A, Harries AD, Mphasa N, Nyirenda TE, Veen J, Ringdal T, Van Gorkom J, Salaniponi FM. Evaluation of a unified treatment regimen for all new cases of tuberculosis using guardian-based supervision. Int J Tuberc Lung Dis. 2000 Apr;4(4):333-9. PubMed PMID: 10777082.

937: Johnson JL, Kanya RM, Okwera A, Loughlin AM, Nyole S, Hom DL, Wallis RS, Hirsch CS, Wolski K, Foulds J, Mugerwa RD, Ellner JJ. Randomized controlled trial of Mycobacterium vaccae immunotherapy in non-human immunodeficiency virus-infected ugandan adults with newly diagnosed pulmonary tuberculosis. The Uganda-Case Western Reserve University Research Collaboration. J Infect Dis. 2000 Apr;181(4):1304-12. Epub 2000 Apr 7. PubMed PMID: 10753731.

938: Bwire R, Borgdorff MW, Sticht-Groh V, Rieder HL, Kawuma HJ, Bretzel G, RÄ¼sch-Gerdes S. Tuberculosis chemotherapy and sputum conversion among HIV-seropositive and HIV-seronegative patients in south-eastern Uganda. East Afr Med J. 1999 Jun;76(6):307-13. PubMed PMID: 10750516.

939: Espinal MA, PerÃ©z EN, BaÃ©z J, HÃ©nriquez L, FernÃ©ndez K, Lopez M, Olivo P, Reingold AL. Infectiousness of Mycobacterium tuberculosis in HIV-1-infected patients with tuberculosis: a prospective study. Lancet. 2000 Jan 22;355(9200):275-80. PubMed PMID: 10675075.

940: Griffith DE, Brown BA, Cegielski P, Murphy DT, Wallace RJ Jr. Early results (at 6 months) with intermittent clarithromycin-including regimens for lung disease due to Mycobacterium avium complex. Clin Infect Dis. 2000 Feb;30(2):288-92. PubMed PMID: 10671330.

941: Lobato MN, Mohle-Boetani JC, Royce SE. Missed opportunities for preventing tuberculosis among children younger than five years of age. Pediatrics. 2000 Dec;106(6):E75. PubMed PMID: 11099618.

942: Mac JT, Doordan A, Carr CA. Evaluation of the effectiveness of a directly observed therapy program with Vietnamese tuberculosis patients. Public Health Nurs. 1999 Dec;16(6):426-31. PubMed PMID: 10620253.

943: Kaga K, Park J, Nishiumi N, Iwasaki M, Inoue H. Usefulness of video-assisted thoracic surgery (Two Windows Method) in the treatment of lung cancer for elderly patients. J Cardiovasc Surg (Torino). 1999 Oct;40(5):721-3. PubMed PMID: 10597011.

944: Nutini S, Fiorenti F, Codecasa LR, Casali L, Besozzi G, Di Pisa G, Nardini S, Migliori GB. Hospital admission policy for tuberculosis in pulmonary centres in Italy: a national survey. AIPO Tuberculosis Study Group. Italian Association of Hospital Pulmonologists. Int J Tuberc Lung Dis. 1999 Nov;3(11):985-91. PubMed PMID: 10587320.

945: Aleksandra S, Jacek Z, PaweÅ, R, Ewa AK, Magdalena K. [Results of treating patients with mycobacterial respiratory infections negative for HIV virus (retrospective study)]. Pneumonol Alergol Pol. 1999;67(5-6):200-7. Polish. PubMed

PMID: 10570641.

946: Lawn SD, Shattock RJ, Acheampong JW, Lal RB, Folks TM, Griffin GE, Butera ST. Sustained plasma TNF-alpha and HIV-1 load despite resolution of other parameters of immune activation during treatment of tuberculosis in Africans. AIDS. 1999 Nov 12;13(16):2231-7. PubMed PMID: 10563708.

947: Dizdarević Z. [Basic characteristics of the National Tuberculosis Program in Bosnia-Herzegovina]. Med Arh. 1999;53(3 Suppl 1):5-8. Croatian. PubMed PMID: 10546458.

948: Tsogt G, Levy M, Sudre P, Norval PY, Spinaci S. DOTS (Directly Observed Treatment Strategy) project in Mongolia, 1995. Int J Tuberc Lung Dis. 1999 Oct;3(10):886-90. PubMed PMID: 10524585.

949: Wasiak W, Szmidt M. A six week double blind, placebo controlled, crossover study of the effect of misoprostol in the treatment of aspirin sensitive asthma. Thorax. 1999 Oct;54(10):900-4. PubMed PMID: 10491452; PubMed Central PMCID: PMC1745363.

950: Lao LY, De Guia T. Tuberculin skin testing: determinants and reaction. Respiriology. 1999 Sep;4(3):311-7. PubMed PMID: 10489682.

951: Sung SW, Kang CH, Kim YT, Han SK, Shim YS, Kim JH. Surgery increased the chance of cure in multi-drug resistant pulmonary tuberculosis. Eur J Cardiothorac Surg. 1999 Aug;16(2):187-93. PubMed PMID: 10485419.

952: Tanaka E, Kimoto T, Tsuyuguchi K, Watanabe I, Matsumoto H, Niimi A, Suzuki K, Murayama T, Amitani R, Kuze F. Effect of clarithromycin regimen for Mycobacterium avium complex pulmonary disease. Am J Respir Crit Care Med. 1999 Sep;160(3):866-72. PubMed PMID: 10471610.

953: Mangunegoro H, Hudoyo A. Efficacy of low-dose ofloxacin in the treatment of multidrug-resistant tuberculosis in Indonesia. *Chemotherapy*. 1999;45 Suppl 2:19-25. PubMed PMID: 10449894.

954: Maranetra KN. Quinolones and multidrug-resistant tuberculosis. *Chemotherapy*. 1999;45 Suppl 2:12-8. PubMed PMID: 10449893.

955: Dewan RK, Singh S, Kumar A, Meena BK. Thoracoplasty: an obsolete procedure? *Indian J Chest Dis Allied Sci*. 1999 Apr-Jun;41(2):83-8. PubMed PMID: 10437320.

956: Carneiro JR, Sato EI. Double blind, randomized, placebo controlled clinical trial of methotrexate in systemic lupus erythematosus. *J Rheumatol*. 1999 Jun;26(6):1275-9. PubMed PMID: 10381042.

957: Qin M, Han M, Li S. [Surgical treatment in pulmonary tuberculosis with sputum long-term Mycobacterium tuberculosis positive]. *Zhonghua Jie He He Hu Xi Za Zhi*. 1997 Oct;20(5):311-2. Chinese. PubMed PMID: 10374461.

958: Xiao C, Fu Y, Li Z. [Efficacy of unfixed continuation phase short-course chemotherapy]. *Zhonghua Jie He He Hu Xi Za Zhi*. 1997 Dec;20(6):358-60. Chinese. PubMed PMID: 10374447.

959: Zhang Y, Qian H, Chen M. [Bronchofiberscope and catheter intervention in treatment of multi-drug resistant pulmonary tuberculosis]. *Zhonghua Jie He He Hu Xi Za Zhi*. 1997 Dec;20(6):354-7. Chinese. PubMed PMID: 10374446.

960: Liu Z, Shilkret KL, Ellis HM. Predictors of sputum culture conversion among patients with tuberculosis in the era of tuberculosis resurgence. *Arch Intern Med*. 1999 May 24;159(10):1110-6. PubMed PMID: 10335689.

961: Zalesky R, Abdullajev F, Khechinashvili G, Safarian M, Madaras T, Grzemska

M, Englund E, Dittmann S, Raviglione M. Tuberculosis control in the Caucasus: successes and constraints in DOTS implementation. *Int J Tuberc Lung Dis.* 1999 May;3(5):394-401. PubMed PMID: 10331728.

962: Serrate G, Vaqueiro M, Nã°Ã±ez M, Tobar M, Cascales E, Segura F. [Tuberculosis in a social health care center: epidemiologic study and prevention activities]. *Enferm Infecc Microbiol Clin.* 1999 Mar;17(3):130-4. Spanish. PubMed PMID: 10217848.

963: BilaÅSeroÄYlu S, Perim K, BÃ¼yÃ¼kÅYirin M, Celikten E. Prednisolone: a beneficial and safe adjunct to antituberculosis treatment? A randomized controlled trial. *Int J Tuberc Lung Dis.* 1999 Jan;3(1):47-54. PubMed PMID: 10094169.

964: Marciniuk DD, McNab BD, Martin WT, Hoepfner VH. Detection of pulmonary tuberculosis in patients with a normal chest radiograph. *Chest.* 1999 Feb;115(2):445-52. PubMed PMID: 10027446.

965: Hellyer TJ, DesJardin LE, Teixeira L, Perkins MD, Cave MD, Eisenach KD. Detection of viable Mycobacterium tuberculosis by reverse transcriptase-strand displacement amplification of mRNA. *J Clin Microbiol.* 1999 Mar;37(3):518-23. PubMed PMID: 9986805; PubMed Central PMCID: PMC84447.

966: LoBue PA, Cass R, Lobo D, Moser K, Catanzaro A. Development of housing programs to aid in the treatment of tuberculosis in homeless individuals: a pilot study. *Chest.* 1999 Jan;115(1):218-23. PubMed PMID: 9925087.

967: Kumaresan JA, Ahsan Ali AK, Parkkali LM. Tuberculosis control in Bangladesh: success of the DOTS strategy. *Int J Tuberc Lung Dis.* 1998 Dec;2(12):992-8. PubMed PMID: 9869115.

968: Jarvis B, Lamb HM. Rifapentine. *Drugs.* 1998 Oct;56(4):607-16; discussion 617. Review. Erratum in: *Drugs* 1999 Apr;57(4):506. PubMed PMID: 9806107.

969: Lienhardt C, Manneh K, Bouchier V, Lahai G, Milligan PJ, McAdam KP. Factors determining the outcome of treatment of adult smear-positive tuberculosis cases in The Gambia. *Int J Tuberc Lung Dis*. 1998 Sep;2(9):712-8. PubMed PMID: 9755924.

970: Weir SC, Fischer SH, Stock F, Gill VJ. Detection of Legionella by PCR in respiratory specimens using a commercially available kit. *Am J Clin Pathol*. 1998 Sep;110(3):295-300. PubMed PMID: 9728603.

971: Outcome of first-line tuberculosis treatment in migrants from Vietnam. International Organization for Migration Tuberculosis Working Group. *Int J Tuberc Lung Dis*. 1998 Aug;2(8):641-6. PubMed PMID: 9712278.

972: Karak B, Garg RK. Corticosteroids in tuberculous meningitis. *Indian Pediatr*. 1998 Feb;35(2):193-4. PubMed PMID: 9707871.

973: Morcos MM, Gabr AA, Samuel S, Kamel M, el Baz M, el Beshry M, Michail RR. Vitamin D administration to tuberculous children and its value. *Boll Chim Farm*. 1998 May;137(5):157-64. PubMed PMID: 9689902.

974: McKenna MT, McCray E, Jones JL, Onorato IM, Castro KG. The fall after the rise: Tuberculosis in the United States, 1991 through 1994. *Am J Public Health*. 1998 Jul;88(7):1059-63. PubMed PMID: 9663154; PubMed Central PMCID: PMC1508272.

975: Griffith DE, Brown BA, Murphy DT, Girard WM, Couch L, Wallace RJ Jr. Initial (6-month) results of three-times-weekly azithromycin in treatment regimens for Mycobacterium avium complex lung disease in human immunodeficiency virus-negative patients. *J Infect Dis*. 1998 Jul;178(1):121-6. PubMed PMID: 9652431.

976: Iinuma Y, Ichiyama S, Yamori S, Oohama J, Takagi N, Hasegawa Y, Shimokata K,

Nakashima N. Diagnostic value of the Amplicor PCR assay for initial diagnosis and assessment of treatment response for pulmonary tuberculosis. Microbiol Immunol. 1998;42(4):281-7. PubMed PMID: 9623915.

977: Cao JP, Zhang LY, Zhu JQ, Chin DP. Two-year follow-up of directly-observed intermittent regimens for smear-positive pulmonary tuberculosis in China. Int J Tuberc Lung Dis. 1998 May;2(5):360-4. PubMed PMID: 9613630.

978: Jouveshomme S, Dautzenberg B, Bakdach H, Derenne JP. Preliminary results of collapse therapy with plombage for pulmonary disease caused by multidrug-resistant mycobacteria. Am J Respir Crit Care Med. 1998 May;157(5 Pt 1):1609-15. PubMed PMID: 9603145.

979: el-Sadr WM, Perlman DC, Matts JP, Nelson ET, Cohn DL, Salomon N, Olibrice M, Medard F, Chirgwin KD, Mildvan D, Jones BE, Telzak EE, Klein O, Heifets L, Hafner R. Evaluation of an intensive intermittent-induction regimen and duration of short-course treatment for human immunodeficiency virus-related pulmonary tuberculosis. Terry Bein Community Programs for Clinical Research on AIDS (CPCRA) and the AIDS Clinical Trials Group (ACTG). Clin Infect Dis. 1998 May;26(5):1148-58. PubMed PMID: 9597244.

980: Asch S, Leake B, Anderson R, Gelberg L. Why do symptomatic patients delay obtaining care for tuberculosis? Am J Respir Crit Care Med. 1998 Apr;157(4 Pt 1):1244-8. PubMed PMID: 9563746.

981: Park IW, Choi BW, Hue SH. Prospective study of corticosteroid as an adjunct in the treatment of endobronchial tuberculosis in adults. Respirology. 1997 Dec;2(4):275-81. PubMed PMID: 9525297.

982: Telzak EE, Fazal BA, Turett GS, Justman JE, Blum S. Factors influencing time to sputum conversion among patients with smear-positive pulmonary tuberculosis. Clin Infect Dis. 1998 Mar;26(3):775-6. PubMed PMID: 9524873.

983: Wiesemann HG, Steinkamp G, Ratjen F, Bauernfeind A, Przyklenk B, DÄrting G, von der Hardt H. Placebo-controlled, double-blind, randomized study of aerosolized tobramycin for early treatment of Pseudomonas aeruginosa colonization in cystic fibrosis. *Pediatr Pulmonol.* 1998 Feb;25(2):88-92. PubMed PMID: 9516091.

984: Rajeswari R, Chandrasekaran K, Thiruvalluvan E, Rajaram K, Sudha G, Sivasubramanian S, Santha T, Prabhakar R. Study of the feasibility of involving male student volunteers in case holding in an urban tuberculosis programme. *Int J Tuberc Lung Dis.* 1997 Dec;1(6):573-5. PubMed PMID: 9487457.

985: Zhao FZ, Levy MH, Wen S. Sputum microscopy results at two and three months predict outcome of tuberculosis treatment. *Int J Tuberc Lung Dis.* 1997 Dec;1(6):570-2. PubMed PMID: 9487456.

986: Schwander SK, Dietrich M, Mugenyi P, Kityo C, Okwera A, Johnson J, Nsubuga P, Ruesch-Gerdes S, Whalen C. Clinical course of human immunodeficiency virus type 1 associated pulmonary tuberculosis during short-course antituberculosis therapy. *East Afr Med J.* 1997 Sep;74(9):543-8. PubMed PMID: 9487427.

987: Bando T, Fujimura M, Shinagawa S, Mizuhashi K, Noda Y, Ohta G, Hirone T, Matsuda T. Effect of beclomethasone dipropionate inhalation on eosinophilic bronchitis in patients with silicosis. *Arzneimittelforschung.* 1997 Dec;47(12):1370-4. PubMed PMID: 9450166.

988: Telzak EE, Fazal BA, Pollard CL, Turett GS, Justman JE, Blum S. Factors influencing time to sputum conversion among patients with smear-positive pulmonary tuberculosis. *Clin Infect Dis.* 1997 Sep;25(3):666-70. PubMed PMID: 9314458.

989: Ye Z, Pei X, Yang Y. [Analysis of causes of drug resistance and therapeutic

effects on 27 multi-drug resistant pulmonary tuberculosis patients].  
Zhonghua Jie  
He He Hu Xi Za Zhi. 1997 Aug;20(4):234-6. Chinese. PubMed PMID:  
10072811.

990: Hong Z, Li S. [Diagnosis and surgical treatment for tuberculous  
bronchostenosis]. Zhonghua Jie He He Hu Xi Za Zhi. 1997  
Aug;20(4):231-3. Chinese.  
PubMed PMID: 10072810.

991: Manresa F, Galarza I, Cañete C. Using corticosteroids to treat  
tuberculous  
pleurisy. Chest. 1997 Jul;112(1):291-2. PubMed PMID: 9228398.

992: Agutu WO. Short-course tuberculosis chemotherapy in rural  
Somalia. East Afr  
Med J. 1997 Jun;74(6):348-52. PubMed PMID: 9487394.

993: Nakaya M, Yoneda T, Kobayashi A, Onohara Y, Ikoma Y, Fukuoka A,  
Tomoda K,  
Takenaka H, Okamura H, Yamamoto C, Fukuoka K, Tokuyama T, Okamoto Y,  
Yoshikawa M,  
Tsukaguchi K, Narita N. [Cytokine producing ability of peripheral  
blood  
mononuclear cells in the clinical course of pulmonary tuberculosis].  
Kekkaku.  
1997 Jun;72(6):403-10. Japanese. PubMed PMID: 9248274.

994: Tanaka E, Amitani R, Niimi A, Suzuki K, Murayama T, Kuze F.  
Yield of  
computed tomography and bronchoscopy for the diagnosis of  
Mycobacterium avium  
complex pulmonary disease. Am J Respir Crit Care Med. 1997  
Jun;155(6):2041-6.  
PubMed PMID: 9196113.

995: Menzies D. Issues in the management of contacts of patients  
with active  
pulmonary tuberculosis. Can J Public Health. 1997 May-Jun;88(3):197-  
201. Review.  
PubMed PMID: 9260361.

996: Božáky G, Ruby E, Gábor I, Tóth J, Mohos A. [Hematologic  
abnormalities in  
pulmonary tuberculosis]. Orv Hetil. 1997 Apr 27;138(17):1053-6.  
Hungarian.  
PubMed PMID: 9182273.

997: Hirano K, Saitoh T, Kadono K, Oose H, Watanabe S, Hasegawa S. [Conversion of chronic necrotizing pulmonary aspergillosis to invasive pulmonary aspergillosis, and successful treatment with fluconazole]. Nihon Kyobu Shikkan Gakkai Zasshi. 1997 Apr;35(4):408-13. Review. Japanese. PubMed PMID: 9212665.

998: Chaulk CP, Pope DS. The Baltimore City Health Department program of directly observed therapy for tuberculosis. Clin Chest Med. 1997 Mar;18(1):149-54. Review. PubMed PMID: 9098619.

999: Tämmmler B, Bosshammer J, Breitenstein S, Brockhausen I, Gudowius P, Herrmann C, Herrmann S, Heuer T, Kubesch P, Mekus F, RÄmmling U, Schmidt KD, Spangenberg C, Walter S. Infections with Pseudomonas aeruginosa in patients with cystic fibrosis. Behring Inst Mitt. 1997 Feb;(98):249-55. Review. PubMed PMID: 9382747.

1000: Fujita A, Suzuki A, Hamaoka T, Tojima H. [Clinical course of HIV-infected tuberculosis patients who admitted to the tuberculosis isolation ward: current problems of medical care]. Kekkaku. 1997 Feb;72(2):67-72. Japanese. PubMed PMID: 9071088.

1001: Schoeman JF, Van Zyl LE, Laubscher JA, Donald PR. Effect of corticosteroids on intracranial pressure, computed tomographic findings, and clinical outcome in young children with tuberculous meningitis. Pediatrics. 1997 Feb;99(2):226-31. PubMed PMID: 9024451.

1002: Korzeniewska-KoseÅ,a M, MichaÅ,owska-Mitczuk D, Wedzicha S, Pawlicka L, Miller M, KuÅ> J. [Reasons for chronic expectoration in patients with pulmonary tuberculosis registered in the Central Tuberculosis Registry]. Pneumonol Alergol Pol. 1997;65(3-4):181-6. Polish. PubMed PMID: 9489413.

1003: MichaÅ,owska-Mitczuk D, KuÅ> J. [Treatment of patients for chronic pulmonary

tuberculosis with expectoration--selection and tolerance to drugs].  
Pneumonol  
Alergol Pol. 1997;65(3-4):172-80. Polish. PubMed PMID: 9489412.

1004: MichaÅłowska-Mitczuk D, KuÅł J. [Treatment of patients with  
chronic pulmonary  
tuberculosis with expectoration--evaluation of effectiveness].  
Pneumonol Alergol  
Pol. 1997;65(3-4):164-71. Polish. PubMed PMID: 9489411.

1005: Yuen KY, Chan KS, Chan CM, Ho PL, Ng MH. Monitoring the  
therapy of  
pulmonary tuberculosis by nested polymerase chain reaction assay. J  
Infect. 1997  
Jan;34(1):29-33. PubMed PMID: 9120321.

1006: Yano M, Arai T, Inagaki K, Nomura T. [Surgically unsuccessful  
cases with  
pulmonary tuberculosis]. Kekkaku. 1997 Jan;72(1):35-8. Japanese.  
PubMed PMID:  
9038013.

1007: Wen S, Su Y, Zhang F. [Analysis of short-term effects of  
short-course  
intermittent chemotherapies of the World Bank Loaned Project].  
Zhonghua Jie He He  
Hu Xi Za Zhi. 1996 Dec;19(6):357-9. Chinese. PubMed PMID: 9596819.

1008: Lambregts-van Weezenbeek CS, Keizer ST, Sebek MM, Schepp-  
Beelen JC, van der  
Loo CJ. [Transmission of multiresistant tuberculosis in a Dutch  
hospital]. Ned  
Tijdschr Geneesk. 1996 Nov 16;140(46):2293-5. Dutch. PubMed PMID:  
8984384.

1009: Frieden TR, Sherman LF, Maw KL, Fujiwara PI, Crawford JT,  
Nivin B, Sharp V,  
Hewlett D Jr, Brudney K, Alland D, Kreisworth BN. A multi-  
institutional outbreak  
of highly drug-resistant tuberculosis: epidemiology and clinical  
outcomes. JAMA.  
1996 Oct 16;276(15):1229-35. PubMed PMID: 8849750.

1010: Hursti TJ, Avall-Lundqvist E, BÅrjeson S, Fredrikson M,  
FÅrirst CJ, Steineck  
G, Peterson C. Impact of tumour burden on chemotherapy-induced  
nausea and  
vomiting. Br J Cancer. 1996 Oct;74(7):1114-9. PubMed PMID: 8855984;  
PubMed

Central PMCID: PMC2077107.

1011: Virgo KS, Naunheim KS, McKirgan LW, Kissling ME, Lin JC, Johnson FE. Cost of patient follow-up after potentially curative lung cancer treatment. *J Thorac Cardiovasc Surg.* 1996 Aug;112(2):356-63. PubMed PMID: 8751503.

1012: el-Sadr W, Medard F, Berthaud V. Directly observed therapy for tuberculosis: the Harlem Hospital experience, 1993. *Am J Public Health.* 1996 Aug;86(8):1146-9. Erratum in: *Am J Public Health* 1997 Feb;87(2):168. Berthaud V [corrected to Berthaud V]. PubMed PMID: 8712276; PubMed Central PMCID: PMC1380628.

1013: Wyser C, Walzl G, Smedema JP, Swart F, van Schalkwyk EM, van de Wal BW. Corticosteroids in the treatment of tuberculous pleurisy. A double-blind, placebo-controlled, randomized study. *Chest.* 1996 Aug;110(2):333-8. PubMed PMID: 8697829.

1014: Quijada-Carrera J, Valenzuela-Castaño A, Povedano-Gómez J, Fernández-Rodríguez A, Hernández-Mediano W, Gutierrez-Rubio A, de la Iglesia-Salgado JL, García-López A. Comparison of tenoxicam and bromazepam in the treatment of fibromyalgia: a randomized, double-blind, placebo-controlled trial. *Pain.* 1996 May-Jun;65(2-3):221-5. PubMed PMID: 8826510.

1015: Kennedy N, Berger L, Curram J, Fox R, Gutmann J, Kisyombe GM, Ngowi FI, Ramsay AR, Saruni AO, Sam N, Tillotson G, Uiso LO, Yates M, Gillespie SH. Randomized controlled trial of a drug regimen that includes ciprofloxacin for the treatment of pulmonary tuberculosis. *Clin Infect Dis.* 1996 May;22(5):827-33. PubMed PMID: 8722940.

1016: Yan S, Ye H, Lin S. [Effects of intermittent short-course chemotherapy under full-course supervision on the treatment of smear positive pulmonary tuberculosis]. *Zhonghua Jie He He Hu Xi Za Zhi.* 1996 Apr;19(2):104-6. Chinese. PubMed PMID: 9388851.

1017: Sharma SK, Guleria R, Jain D, Chawla TC, Saha P, Mohan A, Jain NK. Effect of additional oral ofloxacin administration in the treatment of multidrug-resistant tuberculosis. Indian J Chest Dis Allied Sci. 1996 Apr-Jun;38(2):73-9. PubMed PMID: 8822640.

1018: Grassi C, Peona V. Use of rifabutin in the treatment of pulmonary tuberculosis. Clin Infect Dis. 1996 Apr;22 Suppl 1:S50-4. Review. PubMed PMID: 8785257.

1019: Rieder HL. Sputum smear conversion during directly observed treatment for tuberculosis. Tuber Lung Dis. 1996 Apr;77(2):124-9. PubMed PMID: 8762846.

1020: Lee CN, Lin TP, Chang MF, Jimenez MV, Dolfi L, Olliaro P. Rifabutin as salvage therapy for cases of chronic multidrug-resistant pulmonary tuberculosis in Taiwan. J Chemother. 1996 Apr;8(2):137-43. PubMed PMID: 8708745.

1021: McColloster P, Neff NE. Outpatient management of tuberculosis. Am Fam Physician. 1996 Apr;53(5):1579-94. Review. PubMed PMID: 8623687.

1022: Chotmongkol V, Jitpimolmard S, Thavornpitak Y. Corticosteroid in tuberculous meningitis. J Med Assoc Thai. 1996 Feb;79(2):83-90. PubMed PMID: 8868018.

1023: Sousa AR, Lane SJ, Atkinson BA, Poston RN, Lee TH. The effects of prednisolone on the cutaneous tuberculin response in patients with corticosteroid-resistant bronchial asthma. J Allergy Clin Immunol. 1996 Feb;97(2):698-706. PubMed PMID: 8621857.

1024: Li H, Ling Y. Treating tuberculous pleurisy with effusion by artificial pneumothorax. Ann Ist Super Sanita. 1996;32(3):399-403. PubMed PMID: 9028062.

- 1025: Suo J, Yu MC, Lee CN, Chiang CY, Lin TP. Treatment of multidrug-resistant tuberculosis in Taiwan. *Chemotherapy*. 1996;42 Suppl 3:20-3; discussion 30-3. PubMed PMID: 8980864.
- 1026: Zhang LX. Treatment of multidrug-resistant tuberculosis in China. *Chemotherapy*. 1996;42 Suppl 3:16-9; discussion 30-3. Review. PubMed PMID: 8980863.
- 1027: Maranetra KN. Treatment of multidrug-resistant tuberculosis in Thailand. *Chemotherapy*. 1996;42 Suppl 3:10-5; discussion 30-3. Review. PubMed PMID: 8980862.
- 1028: Hara H. [From the aspects of complicated diseases]. *Kekkaku*. 1996 Jan;71(1):47-56. Japanese. PubMed PMID: 8808269.
- 1029: Liss GM, Khan R, Koven E, Simor AE. Tuberculosis infection among staff at a Canadian community hospital. *Infect Control Hosp Epidemiol*. 1996 Jan;17(1):29-35. PubMed PMID: 8789684.
- 1030: Zhang L, Kan G. [Fifteen years' experience in reformed Beijing tuberculosis control programme]. *Zhonghua Jie He He Hu Xi Za Zhi*. 1995 Dec;18(6):337-9, 382. Chinese. PubMed PMID: 8762490.
- 1031: Urbanczik R. [Therapeutic approaches in diseases caused by mycobacteria]. *Pneumologie*. 1995 Dec;49 Suppl 3:649-52. Review. German. PubMed PMID: 8577670.
- 1032: Fischer B, Ferlinz R. [Therapy and prognosis of tuberculosis]. *Versicherungsmedizin*. 1995 Dec 1;47(6):212-6. Review. German. PubMed PMID: 8571498.
- 1033: Galarza I, Cañete C, Granados A, Estopañ R, Manresa F. Randomised trial of corticosteroids in the treatment of tuberculous pleurisy. *Thorax*. 1995

Dec;50(12):1305-7. PubMed PMID: 8553306; PubMed Central PMCID: PMC1021356.

1034: Jayaswal R, Arora PN, Panda BN. HIV IN TUBERCULOSIS. Med J Armed Forces India. 1995 Oct;51(4):259-263. doi: 10.1016/S0377-1237(17)30987-5. Epub 2017 Jun 26. PubMed PMID: 28769309; PubMed Central PMCID: PMC5530203.

1035: Chaulk CP, Moore-Rice K, Rizzo R, Chaisson RE. Eleven years of community-based directly observed therapy for tuberculosis. JAMA. 1995 Sep 27;274(12):945-51. PubMed PMID: 7674524.

1036: Johnson BJ, Ress SR, Willcox P, Pati BP, Lorgat F, Stead P, Saha R, Lukey P, Laochumroonvorapong P, Corral L, et al. Clinical and immune responses of tuberculosis patients treated with low-dose IL-2 and multidrug therapy. Cytokines Mol Ther. 1995 Sep;1(3):185-96. PubMed PMID: 9384675.

1037: Jawad F, Shera AS, Memon R, Ansari G. Glucose intolerance in pulmonary tuberculosis. J Pak Med Assoc. 1995 Sep;45(9):237-8. PubMed PMID: 8683828.

1038: Grassi C, Peona V. New drugs for tuberculosis. Eur Respir J Suppl. 1995 Sep;20:714s-718s. Review. PubMed PMID: 8590571.

1039: Dlugovitzky D, Torres A, Hourquescos MC, Svetaz MJ, Quagliato N, Valentini E, Amigot B, Molteni O, Bottasso O. Low occurrence of arthritic manifestations in patients with pulmonary tuberculosis. T cell subsets and humoral studies. Mem Inst Oswaldo Cruz. 1995 Sep-Oct;90(5):623-8. PubMed PMID: 8569477.

1040: Tian XZ, Wang LX. [A study on the implementation of primary chemotherapy to pulmonary tuberculosis with positive bacillus]. Zhonghua Liu Xing Bing Xue Za Zhi. 1995 Aug;16(4):220-2. Chinese. PubMed PMID: 7585902.

1041: Bagnato GF, Di Cesare E, Gulli S, Cucinotta D. Long-term treatment of

pulmonary tuberculosis with ofloxacin in a subject with liver cirrhosis. Monaldi Arch Chest Dis. 1995 Aug;50(4):279-81. PubMed PMID: 7550207.

1042: Musch E, TÄnnerhoff-MÄtcke A. [Tuberculous anal fistula in acquired immunologic deficiency syndrome]. Z Gastroenterol. 1995 Aug;33(8):440-4. German. PubMed PMID: 7483736.

1043: McAdams HP, Erasmus J, Winter JA. Radiologic manifestations of pulmonary tuberculosis. Radiol Clin North Am. 1995 Jul;33(4):655-78. Review. PubMed PMID: 7610237.

1044: Kameda K. [Status quo of pyrazinamide as an antituberculosis drug]. Kekkaku. 1995 Jul;70(7):445-55. Review. Japanese. PubMed PMID: 7564054.

1045: Templeton GL, Illing LA, Young L, Cave D, Stead WW, Bates JH. The risk for transmission of Mycobacterium tuberculosis at the bedside and during autopsy. Ann Intern Med. 1995 Jun 15;122(12):922-5. PubMed PMID: 7755227.

1046: Punnotok J, Pumprueg U, Chakorn T. A comparison of two short course tuberculosis chemotherapy regimens, both using Rifater during an intensive phase, with a 3 year follow-up. J Med Assoc Thai. 1995 Jun;78(6):298-304. PubMed PMID: 7561554.

1047: Schwander S, RÄsch-Gerdes S, Mateega A, Lutalo T, Tugume S, Kityo C, Rubaramira R, Mugenyi P, Okwera A, Mugerwa R. A pilot study of antituberculosis combinations comparing rifabutin with rifampicin in the treatment of HIV-1 associated tuberculosis. A single-blind randomized evaluation in Ugandan patients with HIV-1 infection and pulmonary tuberculosis. Tuber Lung Dis. 1995 Jun;76(3):210-8. PubMed PMID: 7548903.

1048: KaustovÄ; J, ChmelÄ-k M, EttlovÄ; D, Hudec V, LazarovÄ; H, RichtrovÄ; S. Disease

due to *Mycobacterium kansasii* in the Czech Republic: 1984-89. *Tuber Lung Dis.*

1995 Jun;76(3):205-9. PubMed PMID: 7548902.

1049: Sauret J, Hernández-Flix S, Castro E, Hernández L, Ausina V, Coll P.

Treatment of pulmonary disease caused by *Mycobacterium kansasii*: results of 18 vs

12 months' chemotherapy. *Tuber Lung Dis.* 1995 Apr;76(2):104-8.

PubMed PMID:

7780090.

1050: Hoogkamp-Korstanje JA, Meis JF, Kissing J, van der Laag J, Melchers WJ.

Risk of cross-colonization and infection by *Pseudomonas aeruginosa* in a holiday

camp for cystic fibrosis patients. *J Clin Microbiol.* 1995

Mar;33(3):572-5. PubMed

PMID: 7751359; PubMed Central PMCID: PMC227992.

1051: Mählberger F, Nturanye F, Nasbimana J, Portaels F.

[Ofloxacin-cycloserine-protionamide-INH combination against treatment refractory

lung tuberculosis]. *Pneumologie.* 1995 Feb;49(2):72-6. German. PubMed

PMID:

7724506.

1052: Bose M, Gupta A, Banavalikar JN, Saha K. Dysregulation of homeostasis of

blood T-lymphocyte subpopulations persists in chronic multibacillary pulmonary

tuberculosis patients refractory to treatment. *Tuber Lung Dis.* 1995

Feb;76(1):59-64. PubMed PMID: 7718849.

1053: Qian Y, Zhao D, Liu S. [Implementation of national

tuberculosis control

programme--focus on registration, case-management and treatment].

*Zhonghua Jie He*

*He Hu Xi Za Zhi.* 1995 Feb;18(1):16-8, 62. Chinese. PubMed PMID:

7600598.

1054: Mählberger F, Nturanye F, Ladner J. [Clinical findings and follow-up of 100

each HIV-negative and HIV-positive cases of bacillary pulmonary tuberculosis in

Rwanda]. *Pneumologie.* 1995 Jan;49(1):27-31. German. PubMed PMID:

7892154.

1055: Wada M, Yosiyama T, Yosikawa M, Ogata H, Sugie T, Nakasono T, Sugita H.

[Six-month short course chemotherapy containing pyrazinamide for initial treatment of pulmonary tuberculosis]. Kekkaku. 1994 Nov;69(11):671-80. Japanese.

PubMed PMID: 7837720.

1056: Hoheisel G, Teschler H, Chan BK, Chan CH, Luk WK, Sun AJ, Costabel U,

Konietzko N. [Roentgen findings in bronchial tuberculosis].

Pneumologie. 1994

Nov;48(11):788-92. German. PubMed PMID: 7824499.

1057: Gonzalez-Montaner LJ, Natal S, Yongchaiyud P, Olliaro P.

Rifabutin for the

treatment of newly-diagnosed pulmonary tuberculosis: a

multinational, randomized,

comparative study versus Rifampicin. Rifabutin Study Group. Tuber

Lung Dis. 1994

Oct;75(5):341-7. PubMed PMID: 7841427.

1058: Hongthiamthong P, Riantawan P, Subhannachart P, Fuangtong P. Clinical

aspects and treatment outcome in HIV-associated pulmonary tuberculosis: an

experience from a Thai referral centre. J Med Assoc Thai. 1994

Oct;77(10):520-5.

PubMed PMID: 7745373.

1059: Dai YS, Li Q, Duanmu HJ. [The operational control studies of smear positive

tuberculosis cases with short-course chemotherapy under the full-course

management and supervision]. Zhonghua Jie He He Hu Xi Za Zhi. 1994

Oct;17(5):278-80, 318. Chinese. PubMed PMID: 7712567.

1060: Sekhon AS, Stein L, Garg AK, Black WA, Glezos JD, Wong C. Pulmonary

penicillosis marneffei: report of the first imported case in Canada.

Mycopathologia. 1994 Oct;128(1):3-7. PubMed PMID: 7708089.

1061: Toyota E, Suzuki T, Tagawa K, Takahara M, Ito M, Arai T, Kabe J, Baba H.

[Evaluation of the streptomycin twice weekly with INH and RFP for initial therapy

of pulmonary tuberculosis]. Kekkaku. 1994 Sep;69(9):559-63.

Japanese. PubMed

PMID: 7967317.

1062: Kitahara Y, Ikeda A, Kajiki A, Maruyama M, Harada S, Harada Y, Takamoto M, Ishibashi T. [An investigation on risk factors relating to the treatment difficulty in originally treated pulmonary tuberculosis cases]. Kekkaku. 1994 Aug;69(8):503-11. Japanese. PubMed PMID: 7933776.

1063: Kumarvelu S, Prasad K, Khosla A, Behari M, Ahuja GK. Randomized controlled trial of dexamethasone in tuberculous meningitis. Tuber Lung Dis. 1994 Jun;75(3):203-7. PubMed PMID: 7919313.

1064: Macnab MF, Bohmer PD, Seager JR. Evaluation of the 3-drug combination, Rifater, versus 4-drug therapy in the ambulatory treatment of tuberculosis in Cape Town. S Afr Med J. 1994 Jun;84(6):325-8. PubMed PMID: 7740377.

1065: Wallace RJ Jr, Brown BA, Griffith DE, Girard WM, Murphy DT, Onyi GO, Steingrube VA, Mazurek GH. Initial clarithromycin monotherapy for Mycobacterium avium-intracellulare complex lung disease. Am J Respir Crit Care Med. 1994 May;149(5):1335-41. PubMed PMID: 8173775.

1066: Wallace RJ Jr, Dunbar D, Brown BA, Onyi G, Dunlap R, Ahn CH, Murphy DT. Rifampin-resistant Mycobacterium kansasii. Clin Infect Dis. 1994 May;18(5):736-43. PubMed PMID: 8075262.

1067: Pegues DA, Carson LA, Tablan OC, FitzSimmons SC, Roman SB, Miller JM, Jarvis WR. Acquisition of Pseudomonas cepacia at summer camps for patients with cystic fibrosis. Summer Camp Study Group. J Pediatr. 1994 May;124(5 Pt 1):694-702. PubMed PMID: 7513755.

1068: Boersma WG, Puister SM, van Altena R, de Vries-Hospers HG, Molinari M, KoÅkter GH. Clinical and bacteriological efficacy and tolerability of FCE 22891 in patients with exacerbations of chronic obstructive pulmonary disease. Antimicrob Agents Chemother. 1994 Apr;38(4):872-5. PubMed PMID: 8031062; PubMed Central

PMCID: PMC284559.

1069: Kawashima T, Kioi S, Arakawa M. [Two cases of lung infection due to *Mycobacterium chelonae* subsp. *abscessus*]. *Kansenshogaku Zasshi*. 1994 Mar;68(3):416-20. Review. Japanese. PubMed PMID: 8176285.

1070: Pavlova MV, Ivanova IA, Titarenko OT, Perova TL. [Comparative effectiveness of etiopathogenetic therapy in adolescents with destructive pulmonary tuberculosis]. *Probl Tuberk*. 1994;(2):45-6. Russian. PubMed PMID: 8036221.

1071: Pavlova MV. [Pathogenetic therapy of pulmonary tuberculosis in adolescents]. *Probl Tuberk*. 1994;(3):19-21. Russian. PubMed PMID: 7937663.

1072: Valentini G, Forlani S, Zompatori M, Longi R. [Computerized tomography in the study of tuberculosis]. *Radiol Med*. 1993 Dec;86(6):820-5. Italian. PubMed PMID: 8296002.

1073: Kennedy N, Fox R, Kisyombe GM, Saruni AO, Uiso LO, Ramsay AR, Ngowi FI, Gillespie SH. Early bactericidal and sterilizing activities of ciprofloxacin in pulmonary tuberculosis. *Am Rev Respir Dis*. 1993 Dec;148(6 Pt 1):1547-51. PubMed PMID: 8256898.

1074: Sandin RL, Isada CM, Hall GS, Tomford JW, Rutherford I, Rogers AL, Washington JA. Aberrant *Histoplasma capsulatum*. Confirmation of identity by a chemiluminescence-labeled DNA probe. *Diagn Microbiol Infect Dis*. 1993 Oct;17(3):235-8. PubMed PMID: 8112034.

1075: Ray D, Saha K, Krishna KS. Serum immunoglobulin E response in sputum positive patients with pulmonary tuberculosis. *Indian J Med Res*. 1993 Jul;97:151-3. PubMed PMID: 8406639.

1076: Wada M, Seita A, Mori T, Ogata H, Sugie T, Sugita H. [Retreatment of

pulmonary tuberculosis--duration of chemotherapy]. Kekkaku. 1993 Jul;68(7):469-78. Japanese. PubMed PMID: 8361115.

1077: Zych D, Pawlicka L, Zielinski J. Inhaled budesonide vs prednisone in the maintenance treatment of pulmonary sarcoidosis. Sarcoidosis. 1993 Mar;10(1):56-61. PubMed PMID: 8134718.

1078: He GJ. [A comparative study of rifapentine treatment and three years follow-up on initial pulmonary tuberculosis]. Zhonghua Jie He He Hu Xi Za Zhi. 1993 Feb;16(2):73-6, 122. Chinese. PubMed PMID: 8251027.

1079: Peng DP. [Assessment on the epidemiological efficiency and treatment of smear positive pulmonary tuberculosis]. Zhonghua Jie He He Hu Xi Za Zhi. 1993 Feb;16(2):85-7, 123. Chinese. PubMed PMID: 8221958.

1080: Liu XR. [A study on the relapse and its potential causes in pulmonary tuberculosis]. Zhonghua Jie He He Hu Xi Za Zhi. 1993 Feb;16(2):69-72, 122. Chinese. PubMed PMID: 8221953.

1081: Minnikin DE, Bolton RC, Hartmann S, Besra GS, Jenkins PA, Mallet AI, Wilkins E, Lawson AM, Ridell M. An integrated procedure for the direct detection of characteristic lipids in tuberculosis patients. Ann Soc Belg Med Trop. 1993;73 Suppl 1:13-24. PubMed PMID: 8129475.

1082: Grosset JH. Treatment of tuberculosis in HIV infection. Tuber Lung Dis. 1992 Dec;73(6):378-83. Review. PubMed PMID: 1337993.

1083: Migliori GB, Borghesi A, Adriko C, Manfrin V, Okware S, Naamara W, Bartoloni A, Neri M, Acocella G. Tuberculosis and HIV infection association in a rural district of northern Uganda: epidemiological and clinical considerations. Tuber Lung Dis. 1992 Oct;73(5):285-90. PubMed PMID: 1493236.

1084: Beck-SaguÃ© C, Dooley SW, Hutton MD, Otten J, Breeden A, Crawford JT,

Pitchenik AE, Woodley C, Cauthen G, Jarvis WR. Hospital outbreak of multidrug-resistant Mycobacterium tuberculosis infections. Factors in transmission to staff and HIV-infected patients. JAMA. 1992 Sep 9;268(10):1280-6. PubMed PMID: 1507374.

1085: Behera D, Dash RJ. Adreno-cortical reserve in pulmonary tuberculosis. J Assoc Physicians India. 1992 Aug;40(8):520-1. PubMed PMID: 1339211.

1086: O'Donnell LJ, Arvind AS, Hoang P, Cameron D, Talbot IC, Jewell DP, Lennard-Jones JE, Farthing MJ. Double blind, controlled trial of 4-aminosalicylic acid and prednisolone enemas in distal ulcerative colitis. Gut. 1992 Jul;33(7):947-9. PubMed PMID: 1644335; PubMed Central PMCID: PMC1379410.

1087: Pretet S, Lebeaut A, Parrot R, Truffot C, Grosset J, Dinh-Xuan AT. Combined chemotherapy including rifabutin for rifampicin and isoniazid resistant pulmonary tuberculosis. G.E.T.I.M. (Group for the Study and Treatment of Resistant Mycobacterial Infection). Eur Respir J. 1992 Jun;5(6):680-4. PubMed PMID: 1321054.

1088: Wolde K, Lema E, Roscigno G, Abdi A. Fixed dose combination short course chemotherapy in the treatment of pulmonary tuberculosis. Ethiop Med J. 1992 Apr;30(2):63-8. PubMed PMID: 1345030.

1089: Murate T, Shimokata K, Watanabe A, Ichiyama S, Saito H, Yamori S, Nomura F, Iwahara T, Sakai S, Nakanishi K, et al. Chest roentgenogram classification and clinical parameters in patients with active pulmonary tuberculosis. Intern Med. 1992 Feb;31(2):185-8. PubMed PMID: 1600264.

1090: Giwercman B, Meyer C, Lambert PA, Reinert C, Højby N. High-level beta-lactamase activity in sputum samples from cystic fibrosis patients during antipseudomonal treatment. Antimicrob Agents Chemother. 1992 Jan;36(1):71-6. PubMed PMID: 1590704; PubMed Central PMCID: PMC189229.

1091: Mihăilescu P, Hartia V, Didilescu C, Ibraim E, Lugoji D, Chiotan D, Sasu AM, Evian N. [The exclusively outpatient treatment of pulmonary tuberculosis under the conditions in Romania]. Pneumoftiziologia. 1992 Jan-Mar;41(1):5-8. Romanian. PubMed PMID: 1299402.

1092: Ojeniyi B, Birch-Andersen A, Mansa B, Rosdahl VT, Håiby N. Morphology of Pseudomonas aeruginosa phages from the sputum of cystic fibrosis patients and from the phage typing set. An electron microscopy study. APMIS. 1991 Oct;99(10):925-30. PubMed PMID: 1930965.

1093: Nowak D, Radenbach D, Kirsten D, Magnussen H. [Tuberculosis treatment today]. Z Gesamte Inn Med. 1991 Aug;46(10-11):404-9. German. PubMed PMID: 1926948.

1094: Al-Hajjaj MS, Pandya L, Marie AA, Madani AA, Al-Sharif N, Al-Majed S. Pulmonary tuberculosis in Saudi Arabia: A retrospective study of 1566 patients. Ann Saudi Med. 1991 Jul;11(4):443-7. PubMed PMID: 17590764.

1095: Levine B, Chaisson RE. Mycobacterium kansasii: a cause of treatable pulmonary disease associated with advanced human immunodeficiency virus (HIV) infection. Ann Intern Med. 1991 May 15;114(10):861-8. PubMed PMID: 1673053.

1096: Pandya L, Al-Sharif N, Maraey A, Al-Majed S, El-Sakka M. Pulmonary tuberculosis in diabetic patients. Ann Saudi Med. 1991 May;11(3):293-6. PubMed PMID: 17588106.

1097: Yamashita M, Morikawa K, Kuroda M. [Clinical implications of the O-antigen serovar E and drug resistance in persistent Pseudomonas infection]. Rinsho Byori. 1991 May;39(5):541-7. Japanese. PubMed PMID: 1906555.

1098: Tsukamura M. [Chemotherapeutic regimens that were considered effective to cure pulmonary infection caused by Mycobacterium avium-Mycobacterium intracellulare complex]. Kekkaku. 1991 May;66(5):375-80. Japanese. PubMed PMID: 1875580.

1099: Kino C, Sato M, Iwasaki T, Takase A, Kinoshita T, Yamaguchi T, Kinjo T, Odo A, Hara M, Hirata H. [Nine month chemotherapy with INH and rifampicin for non-cavitary pulmonary tuberculosis]. Kekkaku. 1991 Apr;66(4):291-7. Japanese. PubMed PMID: 2051705.

1100: Nakae I, Nakatani K, Inoue S, Takahashi K, Ikeda N, Matsumoto T, Ozawa S, Sakatani M, Kita N, Tanaka S. [Therapeutic effect of ofloxacin on intractable pulmonary tuberculosis and ofloxacin resistance of tubercle bacilli isolated from the patients. Chest Disease Cooperative Study Unit of National Sanatoriums in Kinki District]. Kekkaku. 1991 Apr;66(4):299-307. Japanese. PubMed PMID: 1904960.

1101: Wang CL. [Evaluation of administrative practices for the registration of outpatients with pulmonary tuberculosis]. Zhonghua Jie He He Hu Xi Za Zhi. 1991 Apr;14(2):71-3, 125. Chinese. PubMed PMID: 1879018.

1102: Girgis NI, Farid Z, Kilpatrick ME, Sultan Y, Mikhail IA. Dexamethasone adjunctive treatment for tuberculous meningitis. Pediatr Infect Dis J. 1991 Mar;10(3):179-83. PubMed PMID: 2041662.

1103: Kilbourn JP. Phenotypic conversion of Pseudomonas aeruginosa. J Clin Microbiol. 1991 Feb;29(2):416-7. PubMed PMID: 1901068; PubMed Central PMCID: PMC269783.

1104: MoÅ>-Antkowiak R. [Tuberculosis in patients with alcoholism, peptic ulcer, diabetes mellitus or mental disorders]. Pneumonol Alergol Pol. 1991;59(1-2):43-7. Polish. PubMed PMID: 1843886.

1105: Taylor LQ, Williams AJ, Santiago S. Pulmonary disease caused by Mycobacterium asiaticum. Tubercle. 1990 Dec;71(4):303-5. PubMed PMID: 2267684.

1106: Kameda K, Kawabata S, Masuda N. [Follow-up study of short course chemotherapy of pulmonary tuberculosis complicated with diabetes mellitus]. Kekkaku. 1990 Dec;65(12):791-803. Japanese. PubMed PMID: 2077255.

1107: Toppet M, Malfroot A, Derde MP, Toppet V, Spehl M, Dab I. Corticosteroids in primary tuberculosis with bronchial obstruction. Arch Dis Child. 1990 Nov;65(11):1222-6. PubMed PMID: 2248533; PubMed Central PMCID: PMC1792610.

1108: Yew WW, Kwan SY, Ma WK, Khin MA, Chau PY. In-vitro activity of ofloxacin against Mycobacterium tuberculosis and its clinical efficacy in multiply resistant pulmonary tuberculosis. J Antimicrob Chemother. 1990 Aug;26(2):227-36. PubMed PMID: 2120177.

1109: Chen QY, Liu TY. [An approach to the mode of case findings of pulmonary tuberculosis in countryside]. Zhonghua Jie He He Hu Xi Za Zhi. 1990 Aug;13(4):207-8, 253-4. Chinese. PubMed PMID: 2090348.

1110: Thomas A, Balakrishnan A, Nagarajan M, Prabhakar R, Tripathy SP, Christian M, Somasundaram PR. Controlled clinical trial of two multidrug regimens with and without rifampin in highly bacilliferous BL/LL south Indian patients: a five-year report. Int J Lepr Other Mycobact Dis. 1990 Jun;58(2):273-80. PubMed PMID: 2198314.

1111: Fegan M, Francis P, Hayward AC, Davis GH, Fuerst JA. Phenotypic conversion of Pseudomonas aeruginosa in cystic fibrosis. J Clin Microbiol. 1990 Jun;28(6):1143-6. PubMed PMID: 2116444; PubMed Central PMCID: PMC267893.

1112: Cowie RL, Brink BA. Short-course chemotherapy for pulmonary tuberculosis with a rifampicin-isoniazid-pyrazinamide combination tablet. S Afr Med J. 1990 Apr 21;77(8):390-1. PubMed PMID: 2184527.

1113: O'Brien RJ, Geiter LJ, Lyle MA. Rifabutin (ansamycin LM427) for the treatment of pulmonary Mycobacterium avium complex. Am Rev Respir Dis. 1990 Apr;141(4 Pt 1):821-6. PubMed PMID: 2158257.

1114: Nowak D, Radenbach D, Magnussen H. [In 76% of patients with active tuberculosis treated with triple therapy (isoniazid-rifampicin-pyrazinamide) cultural conversion precedes microscopic conversion]. Pneumologie. 1990 Feb;44 Suppl 1:497-8. German. PubMed PMID: 2114634.

1115: Breyer O, Neher A, Feldmann K, Shrestha HB. [Control of tuberculosis in Nepal. A project. Initial results, experiences]. Pneumologie. 1990 Feb;44 Suppl 1:475-6. German. PubMed PMID: 2114632.

1116: Kharakter ZhZ, Mazhak KD, Pavlenko AV. [The role of genetically determined haptoglobin phenotypes in patients with destructive pulmonary tuberculosis]. Probl Tuberk. 1990;(7):50-2. Russian. PubMed PMID: 2235952.

1117: MezhebovskiÄ- VR. [Effectiveness of the treatment of patients with pulmonary tuberculosis using a liver protector zixoryn]. Probl Tuberk. 1990;(10):32-5. Russian. PubMed PMID: 2080156.

1118: Palmero DJ, Teres RI, Eiguchi K. Pulmonary disease due to Mycobacterium terrae. Tubercle. 1989 Dec;70(4):301-3. PubMed PMID: 2626806.

1119: Hiro Y. [Pulmonary tuberculosis and diabetes mellitus--report of the 29th B series of controlled trials of chemotherapy. Cooperative Study Unit of Chemotherapy of Tuberculosis of National Sanatoria in Japan (CSUCTNS)]. Kekkaku. 1989 Nov;64(11):699-705. Japanese. PubMed PMID: 2593461.

1120: Harada S, Takamoto M, Harada Y, Ninomiya H, Maruyama M, Ishibashi T, Shinoda A. [Clinico-immunological studies of pulmonary tuberculosis in the elderly]. *Kekkaku*. 1989 Aug;64(8):529-36. Japanese. PubMed PMID: 2811010.

1121: [A short course of chemotherapy in newly diagnosed and retreatment of smear-positive pulmonary tuberculosis in a rural area]. *Zhonghua Jie He He Hu Xi Za Zhi*. 1989 Aug;12(4):220-2, 254-5. Chinese. PubMed PMID: 2636947.

1122: Tsukamura M, Ichiyama S, Miyachi T. Superiority of enviomycin or streptomycin over ethambutol in initial treatment of lung disease caused by *Mycobacterium avium* complex. *Chest*. 1989 May;95(5):1056-8. PubMed PMID: 2539957.

1123: Johnson PC, Sarosi GA. Community-acquired fungal pneumonias. *Semin Respir Infect*. 1989 Mar;4(1):56-63. Review. PubMed PMID: 2652235.

1124: Fortic B. [Clinical study of a 6-month chemotherapy regimen in the treatment of pulmonary tuberculosis. Results approximately 2 years after completion of chemotherapy]. *Plucne Bolesti*. 1989 Jan-Jun;41(1-2):46-57. Croatian. PubMed PMID: 2798572.

1125: Blaha H, Heilig B, Schreiber MA, Styblo K. Surveillance of diagnostic and treatment measures in Bavaria, 1974-1976. Results 2 and 5 years after the start of chemotherapy. *Tubercle*. 1988 Dec;69(4):255-65. PubMed PMID: 3257004.

1126: Strang JI, Kakaza HH, Gibson DG, Allen BW, Mitchison DA, Evans DJ, Girling DJ, Nunn AJ, Fox W. Controlled clinical trial of complete open surgical drainage and of prednisolone in treatment of tuberculous pericardial effusion in Transkei. *Lancet*. 1988 Oct 1;2(8614):759-64. PubMed PMID: 2901610.

1127: Onwubalili JK, Scott GM. Immune status in tuberculosis and response to treatment. *Tubercle*. 1988 Jun;69(2):81-94. PubMed PMID: 3188236.

1128: Tsukamura M, Ichiyama S. Comparison of antituberculosis drug regimens for lung disease caused by *Mycobacterium avium* complex. *Chest*. 1988 Apr;93(4):821-3. PubMed PMID: 3349841.

1129: Baba H, Shinkai A, Izuchi R, Azuma Y. [Long-term results of short-course chemotherapy in pulmonary tuberculosis (final report). The third study: comparative study of two regimens, 6RHZ and -6RHS (treatment was continued for 6 months after negative conversion of sputum by culture)]. *Kekkaku*. 1988 Apr;63(4):239-46. Japanese. PubMed PMID: 3136270.

1130: Hornick DB, Dayton CS, Bedell GN, Fick RB Jr. Nontuberculous mycobacterial lung disease. Substantiation of a less aggressive approach. *Chest*. 1988 Mar;93(3):550-5. PubMed PMID: 3342664.

1131: Tsukamura M. Evidence that antituberculosis drugs are really effective in the treatment of pulmonary infection caused by *Mycobacterium avium* complex. *Am Rev Respir Dis*. 1988 Jan;137(1):144-8. PubMed PMID: 3337455.

1132: Strang JI, Kakaza HH, Gibson DG, Girling DJ, Nunn AJ, Fox W. Controlled trial of prednisolone as adjuvant in treatment of tuberculous constrictive pericarditis in Transkei. *Lancet*. 1987 Dec 19;2(8573):1418-22. PubMed PMID: 2891992.

1133: Ichiyama S, Tsukamura M. Ofloxacin and the treatment of pulmonary disease due to *Mycobacterium fortuitum*. *Chest*. 1987 Dec;92(6):1110-2. PubMed PMID: 3479304.

1134: Aitken ML, Anderson KM, Albert RK. Is the tuberculosis screening program of

hospital employees still required? Am Rev Respir Dis. 1987  
Oct;136(4):805-7.  
PubMed PMID: 3116895.

1135: Nowak D, Radenbach D, Magnussen H. [Chemotherapy of pulmonary tuberculosis. Sputum culture conversion in 8 weeks in 84% of patients]. Dtsch Med Wochenschr. 1987 Sep 4;112(36):1367-70. German. PubMed PMID: 3622281.

1136: Laursen LC, Faurschou P, Pals H, Svendsen UG, Weeke B. Intramuscular betamethasone dipropionate vs. oral prednisolone in hay fever patients. Allergy. 1987 Apr;42(3):168-72. PubMed PMID: 3592139.

1137: Etzkorn ET, Aldarondo S, McAllister CK, Matthews J, Ognibene AJ. Medical therapy of Mycobacterium avium-intracellulare pulmonary disease. Am Rev Respir Dis. 1986 Sep;134(3):442-5. PubMed PMID: 3752699.

1138: Onadeko BO, Awotedu AA, Ogunbanjo BO, Aderinto EB. Controlled clinical trial of three short-course regimens of chemotherapy for pulmonary tuberculosis in Nigeria--a preliminary report. Tubercle. 1986 Sep;67(3):189-95. PubMed PMID: 3535187.

1139: Ahn CH, Ahn SS, Anderson RA, Murphy DT, Mammo A. A four-drug regimen for initial treatment of cavitary disease caused by Mycobacterium avium complex. Am Rev Respir Dis. 1986 Sep;134(3):438-41. PubMed PMID: 3530069.

1140: Mitchison DA, Nunn AJ. Influence of initial drug resistance on the response to short-course chemotherapy of pulmonary tuberculosis. Am Rev Respir Dis. 1986 Mar;133(3):423-30. PubMed PMID: 2420242.

1141: Huang M. [Studies on sputum conversion of smear-positive, previously untreated pulmonary tuberculosis: a comparison of short-course and standard chemotherapy regimens]. Zhonghua Jie He He Hu Xi Xi Ji Bing Za Zhi. 1986 Feb;9(1):1-5, 61. Chinese. PubMed PMID: 3743274.

1142: Leads from the MMWR. Bacteriologic conversion of sputum among tuberculosis patients--United States. JAMA. 1986 Jan 24-31;255(4):451, 455-6. PubMed PMID: 3941524.

1143: Centers for Disease Control (CDC). Bacteriologic conversion of sputum among tuberculosis patients--United States. MMWR Morb Mortal Wkly Rep. 1985 Dec 13;34(49):747-50. PubMed PMID: 3934517.

1144: Bezel R, Salfinger M, Brändli O. [The transmission of mycobacteria through the fiberoptic bronchoscope]. Schweiz Med Wochenschr. 1985 Sep 28;115(39):1360-5. German. PubMed PMID: 3934749.

1145: Kan GQ, Zhang LX, Wu JC, Ma ZI, Liu CW, Sun FZ. Supervised intermittent chemotherapy for pulmonary tuberculosis in a rural area of China. Tubercle. 1985 Mar;66(1):1-7. PubMed PMID: 3984034.

1146: Tsukamura M, Nakamura E, Yoshii S, Amano H. Therapeutic effect of a new antibacterial substance ofloxacin (DL8280) on pulmonary tuberculosis. Am Rev Respir Dis. 1985 Mar;131(3):352-6. PubMed PMID: 3856412.

1147: Snider DE Jr, Cohn DL, Davidson PT, Hershfield ES, Smith MH, Sutton FD Jr. Standard therapy for tuberculosis 1985. Chest. 1985 Feb;87(2 Suppl):117S-124S. Review. PubMed PMID: 3881230.

1148: Cavallo G. [The etiological agent of tuberculosis]. Minerva Med. 1984 Mar 17;75(11):531-4. Italian. PubMed PMID: 6424053.

1149: Kim TC, Blackman RS, Heatwole KM, Kim T, Rochester DF. Acid-fast bacilli in sputum smears of patients with pulmonary tuberculosis. Prevalence and significance of negative smears pretreatment and positive smears post-treatment. Am Rev Respir Dis. 1984 Feb;129(2):264-8. PubMed PMID: 6421211.

1150: [A controlled trial of 6-month and 12-month regimens after negative conversion of sputum in the original treatment of pulmonary tuberculosis. Report of the 21st series of controlled trials of chemotherapy. Cooperative Study Unit of Chemotherapy of Tuberculosis of National Sanatoria in Japan (CSUCTNS)]. Kekkaku. 1984 Feb;59(2):81-9. Japanese. PubMed PMID: 6379258.

1151: Fischer P, Schilling W. [Therapeutic results in lung diseases caused by atypical mycobacteria]. Z Erkr Atmungsorgane. 1984;162(1):26-9. German. PubMed PMID: 6202070.

1152: Randhawa HS, Khan ZU, Gaur SN. Blastomyces dermatitidis in India: first report of its isolation from clinical material. Sabouraudia. 1983 Sep;21(3):215-21. PubMed PMID: 6415825.

1153: Powell-Jackson PR, Gray BJ, Heaton RW, Costello JF, Williams R, English J. Adverse effect of rifampicin administration on steroid-dependent asthma. Am Rev Respir Dis. 1983 Aug;128(2):307-10. PubMed PMID: 6349444.

1154: B llcskei P. [Pulmonary tuberculosis. 2. Therapy]. Fortschr Med. 1983 Jun 16;101(23):1075-80, 1090. German. PubMed PMID: 6411560.

1155: Nagasawa S. [Evaluation of short-term chemotherapy of pulmonary tuberculosis (2). (a trial of 6-month chemotherapy following negative conversion of the sputum)--a report on the 19th and 20th controlled trials series A of chemotherapy by the Cooperative Study Unit, Japan National Sanatoria)]. Kekkaku. 1983 Jun;58(6):347-53. Japanese. PubMed PMID: 6353032.

1156: Study of chemotherapy regimens of 5 and 7 months' duration and the role of corticosteroids in the treatment of sputum-positive patients with pulmonary tuberculosis in South India. Tubercle. 1983 Jun;64(2):73-91. PubMed PMID: 6351390.

1157: Miller SD. A comparative evaluation of drug combinations used in the treatment of pulmonary tuberculosis. S Afr Med J. 1983 May 14;63(20):764-6.  
PubMed PMID: 6845095.

1158: Banks J, Hunter AM, Campbell IA, Jenkins PA, Smith AP. Pulmonary infection with Mycobacterium kansasii in Wales, 1970-9: review of treatment and response. Thorax. 1983 Apr;38(4):271-4. PubMed PMID: 6867979; PubMed Central PMCID: PMC459534.

1159: Favez G, Leuenberger P. [Priorities among antitubercular measures: epidemiologic arguments]. Schweiz Med Wochenschr. 1983 Jan 22;113(3):96-9.  
French. PubMed PMID: 6828845.

1160: Robertson CE, Ford MJ, Munro JF, Gould JC, Langford DT, Bernstein LS. The efficacy of a new formulation of trimethoprim and sulphadiazine in acute exacerbations of chronic bronchitis. Methods Find Exp Clin Pharmacol. 1983;5(2):127-9. PubMed PMID: 6876943.

1161: Law MR, Holt HA, Reeves DS, Hodson ME. Cefaclor and amoxicillin in the treatment of infective exacerbations of chronic bronchitis. J Antimicrob Chemother. 1983 Jan;11(1):83-8. PubMed PMID: 6337988.

1162: Cassels A, Heineman E, LeClerq S, Gurung PK, Rahut CB. Tuberculosis case-finding in Eastern Nepal. Tubercle. 1982 Sep;63(3):175-85.  
PubMed PMID: 7179484.

1163: Centers for Disease Control (CDC). Bacteriologic conversion of sputum among tuberculosis patients. MMWR Morb Mortal Wkly Rep. 1982 Aug 27;31(33):454, 459-62.  
PubMed PMID: 6815461.

- 1164: Dornetzhuber V, Martis R, Burjanova B, Pavukova K, Turzova M, Vincurova M.  
Pulmonary mycobacteriosis caused by Mycobacterium xenopi. Report of a case. Eur J Respir Dis. 1982 Jul;63(4):293-7. PubMed PMID: 7117426.
- 1165: Catanzaro A. Nosocomial tuberculosis. Am Rev Respir Dis. 1982 May;125(5):559-62. PubMed PMID: 7081816.
- 1166: Ross JB, Levine B, Catanzaro A, Einstein H, Schillaci R, Friedman PJ.  
Ketoconazole for treatment of chronic pulmonary coccidioidomycosis. Ann Intern Med. 1982 Apr;96(4):440-3. PubMed PMID: 6279005.
- 1167: Tabachnik NF, Blackburn P, Peterson CM, Cerami A. Protein binding of N-2-mercaptoethyl-1,3-diaminopropane via mixed disulfide formation after oral administration of WR 2721. J Pharmacol Exp Ther. 1982 Feb;220(2):243-6. PubMed PMID: 6276531.
- 1168: Detre KM, Ware J, Mantel N. Are clinical trials in coronary heart disease oversold or undersold? Circulation. 1981 Oct;64(4):667-8. PubMed PMID: 7023742.
- 1169: Ahn CH, Lowell JR, Ahn SS, Ahn S, Hurst GA. Chemotherapy for pulmonary disease due to Mycobacterium kansasii: efficacies of some individual drugs. Rev Infect Dis. 1981 Sep-Oct;3(5):1028-34. PubMed PMID: 7339800.
- 1170: Good JT Jr, Iseman MD, Davidson PT, Lakshminarayan S, Sahn SA. Tuberculosis in association with pregnancy. Am J Obstet Gynecol. 1981 Jul 1;140(5):492-8. PubMed PMID: 7246682.
- 1171: Gwinup G, Randazzo G, Elias A. The influence of vitamin D intake on serum calcium in tuberculosis. Acta Endocrinol (Copenh). 1981 May;97(1):114-7. PubMed PMID: 6971551.
- 1172: A controlled trial of six months chemotherapy in pulmonary tuberculosis.

First Report: results during chemotherapy. British Thoracic Association. Br J Dis Chest. 1981 Apr;75(2):141-53. PubMed PMID: 7023526.

1173: Zierski M, Bek E, Long MW, Snider DE Jr. Short-course (6 month) cooperative tuberculosis study in Poland: results 18 months after completion of treatment. Am Rev Respir Dis. 1980 Dec;122(6):879-89. PubMed PMID: 7006476.

1174: Pruzzo C, Debbia EA, Satta G. Identification of the major adherence ligand of *Klebsiella pneumoniae* in the receptor for coliphage T7 and alteration of *Klebsiella* adherence properties by lysogenic conversion. Infect Immun. 1980 Nov;30(2):562-71. PubMed PMID: 7002803; PubMed Central PMCID: PMC551348.

1175: Graybill JR, Lundberg D, Donovan W, Levine HB, Rodriguez MD, Drutz DJ. Treatment of coccidioidomycosis with ketoconazole: clinical and laboratory studies of 18 patients. Rev Infect Dis. 1980 Jul-Aug;2(4):661-73. PubMed PMID: 6255548.

1176: Bobrowitz ID. Reversible roentgenographic progression in the initial treatment of pulmonary tuberculosis. Am Rev Respir Dis. 1980 Apr;121(4):735-42. PubMed PMID: 7386981.

1177: Tousek J, ZŠtkovŠ; L, Trnka L, StaflovŠ; S, PapezovŠ; E, DrŠpela J. Factors influencing the effects of the initial phase of tuberculosis chemotherapy. Czech Med. 1980;3(2):114-22. PubMed PMID: 7418568.

1178: Sieler R, Reech R. [Problems concerning old-aged patients with pulmonary tuberculosis from the clinical point of view (author's transl)]. Z Erkr Atmungsorgane. 1980;155(1):114-9. German. PubMed PMID: 7210735.

1179: Ahn CH, Lowell JR, Onstad GD, Ahn SS, Hurst GA. Elimination of *Mycobacterium intracellulare* from sputum after bronchial hygiene. Chest. 1979 Oct;76(4):480-2. PubMed PMID: 477441.

1180: Long MW, Snider DE Jr, Farer LS. U.S. Public Health Service Cooperative trial of three rifampin-isoniazid regimens in treatment of pulmonary tuberculosis. Am Rev Respir Dis. 1979 Jun;119(6):879-94. PubMed PMID: 110184.

1181: Horsfall PA, Plummer J, Allan WG, Girling DJ, Nunn AJ, Fox W. Double blind controlled comparison of aspirin, allopurinol and placebo in the management of arthralgia during pyrazinamide administration. Tubercle. 1979 Mar;60(1):13-24. PubMed PMID: 377739.

1182: Rosenzweig DY. Pulmonary mycobacterial infections due to Mycobacterium intracellulare-avium complex. Clinical features and course in 100 consecutive cases. Chest. 1979 Feb;75(2):115-9. PubMed PMID: 421545.

1183: Quinteros CM, ChehÄ-n E, Wayar E, Ratner M, Amadio G. [Isoprodiane therapy for previously untreated cavitating pulmonary tuberculosis (author's transl)]. Prax Klin Pneumol. 1979 Jan;33(1):45-7. German. PubMed PMID: 760101.

1184: Wernstedt L, Berntsson E, Thiringer G. Cefaclor therapy in acute exacerbations of chronic bronchitis. Postgrad Med J. 1979;55 Suppl 4:56-8. PubMed PMID: 548943.

1185: [Short course chemotherapy for pulmonary tuberculosis with duration for 6 months after sputum negative conversion. (Report 1)--Report of the 19--20th A series of controlled trial of chemotherapy--(author's transl)]. Kekkaku. 1979 Jan;54(1):51-61. Japanese. PubMed PMID: 107362.

1186: Ito F, Okochi T, Yamazaki M, Yamamoto Y, Kondo K, Konishiike J, Asahi T. [Sputum positive conversion among retreatment cases with pulmonary tuberculosis converted to negative by the use of rifampicin (author's transl)]. Kekkaku. 1979 Jan;54(1):37-42. Japanese. PubMed PMID: 107360.

1187: Mok CK, Nandi P, Ong GB. Coexistent bronchogenic carcinoma and active pulmonary tuberculosis. J Thorac Cardiovasc Surg. 1978 Oct;76(4):469-72. PubMed PMID: 212648.

1188: Onadeko BO, Sofowora EO. Daily short course (6 months) chemotherapy for treatment of pulmonary tuberculosis in Nigerians: a preliminary report. Afr J Med Med Sci. 1978 Sep;7(3):175-81. PubMed PMID: 108938.

1189: Xalabarder E. The conversion of sputum in tuberculosis. Scand J Respir Dis Suppl. 1978;102:68-9. PubMed PMID: 98840.

1190: Pines A, Nandi AR, Raafat H, Rahman M. Pivmecillinam and amoxicillin as combined treatment in purulent exacerbations of chronic bronchitis. J Antimicrob Chemother. 1977 Jul;3 Suppl B:141-8. PubMed PMID: 330483.

1191: Albu A, Hartia V, Esrig E, Galbenu M, Marcovici M, GÄflculescu A, Golub M. [Clinical, radiological and bacteriological study of pulmonary tuberculosis with bacteria showing drug resistance]. Rev Ig Bacteriol Virusol Parazitol Epidemiol Pneumoftiziol Pneumoftiziol. 1977 Jul-Sep;26(3):151-60. Romanian. PubMed PMID: 201007.

1192: Dubois P, Gyselen A, Prignot J. Rifampim-combined chemotherapy in coal worker's pneumoconio-tuberculosis. Am Rev Respir Dis. 1977 Feb;115(2):221-8. PubMed PMID: 842936.

1193: Pines A, Nandi AR, Raafat H, Rahman M. Amoxicillin and cotrimoxazole in acute purulent exacerbations of chronic bronchitis. Chemotherapy. 1977;23(1):58-64. PubMed PMID: 830516.

1194: Pines A, Nandi AR, Raafat H, Rahman M. Amoxicillin and cotrimoxazole in acute purulent exacerbations of chronic bronchitis. Chemotherapy. 1977;23(1):58-64. PubMed PMID: 318978.

1195: Rouillon A, Perdrizet S, Parrot R. Transmission of tubercle bacilli: The effects of chemotherapy. *Tubercle*. 1976 Dec;57(4):275-99. Review. PubMed PMID: 827837.

1196: Elkadi A, Salas R, Almond CH. Surgical treatment of atypical pulmonary tuberculosis. *J Thorac Cardiovasc Surg*. 1976 Sep;72(3):435-40. PubMed PMID: 986519.

1197: PĂŃegalinschi N, Moscalu G. [Cured chronic pulmonary tuberculosis]. *Rev Ig Bacteriol Virusol Parazitol Epidemiol Pneumoftiziol Pneumoftiziol*. 1976 Jul-Sep;25(3):179-82. Romanian. PubMed PMID: 188102.

1198: Sahn SA, Lakshminarayan S. Tuberculosis after corticosteroid therapy. *Br J Dis Chest*. 1976 Jul;70(3):195-205. PubMed PMID: 136264.

1199: Ingold A. Conversion of benzylpenicillin to penicilloic acid in patients with chronic bronchial infections. *Chemotherapy*. 1976;22(2):88-96. PubMed PMID: 1253635.

1200: Dandoy S, Hansen R. Tuberculosis care in general hospitals: Arizona's experience. *Am Rev Respir Dis*. 1975 Dec;112(6):757-63. PubMed PMID: 1202996.

1201: Weiss T. [Sputum conversion and behavior of cavitations in the years 1967-1973]. *Schweiz Med Wochenschr*. 1975 Nov 29;105(48):1626-7. German. PubMed PMID: 1215950.

1202: Inhaled corticosteroids compared with oral prednisone in patients starting long-term corticosteroid therapy for asthma. A controlled trial by the British Thoracic and Tuberculosis Association. *Lancet*. 1975 Sep 13;2(7933):469-73. PubMed PMID: 51284.

1203: Onadeko BO, Sofowora EO. Comparative trial of thiacetazone with isoniazid and paraaminosalicylic acid (PAS) with isoniazid in the treatment of pulmonary tuberculosis in Nigerians. *J Trop Med Hyg.* 1975 Sep;78(9):201-5. PubMed PMID: 57244.

1204: Snider DE Jr. Reactivation of tuberculosis in Oklahoma: 1970-1973. *Chest.* 1975 Jul;68(1):36-40. PubMed PMID: 1149527.

1205: Fairshter RD, Randazzo GP, Garlin J, Wilson AF. Failure of isoniazid prophylaxis after exposure to isoniazid-resistant tuberculosis. *Am Rev Respir Dis.* 1975 Jul;112(1):37-42. PubMed PMID: 807140.

1206: Short-course chemotherapy in pulmonary tuberculosis. A controlled trial by the British Thoracic and Tuberculosis Association. *Lancet.* 1975 Jan 18;1(7899):119-24. PubMed PMID: 46047.

1207: Jessamine AG, Gale GL, Eidus L. Therapeutic efficacy of rifampin in newly detected pulmonary tuberculosis. *Can Med Assoc J.* 1974 May 4;110(9):1033-7. PubMed PMID: 4207234; PubMed Central PMCID: PMC1947749.

1208: Juchniewicz M, Radecki A, Kowalczyk H, Grzywacz W. [Effect of ethambutol and rifampicin on sputum conversion in chronically infectious patients]. *Gruzlica.* 1974 May;42(5):397-400. Polish. PubMed PMID: 4464226.

1209: Sutalo I. [Speed of conversion sputum in the culture of sensitive and resistant organisms]. *Plucne Bolesti Tuberk.* 1974;26 Suppl 2:56-9. Croatian. PubMed PMID: 4216922.

1210: Tamura M, Yamazaki A, Tamura T, Takano S, Yamazaki M. [The relation between bacilli negative conversion rate and the number of combined sensitive antituberculous drugs in intermittent administration of rifampicin for severe pulmonary tuberculosis]. *Kekkaku.* 1973 Jul;48(7):297-302. Japanese. PubMed PMID:

4200058.

1211: Doggett RG, Harrison GM. *Pseudomonas aeruginosa*: immune status in patients with cystic fibrosis. *Infect Immun*. 1972 Oct;6(4):628-35. PubMed PMID: 4628901; PubMed Central PMCID: PMC422584.

1212: Winter G, Viereck HJ. [Conversion of the sputum--only a relative success measurement in the treatment of tuberculosis. Bacteriological study of 614 resection preparations]. *Med Welt*. 1972 Sep 16;23(38):1294-7. German. PubMed PMID: 5078662.

1213: Jeanes CW, Jessamine AG, Eidus L. Treatment of chronic drug-resistant pulmonary tuberculosis with rifampin and ethambutol. *Can Med Assoc J*. 1972 Apr 22;106(8):884-8. PubMed PMID: 4623743; PubMed Central PMCID: PMC1940582.

1214: Schonell M, Dorken E, Grzybowski S. Rifampin. *Can Med Assoc J*. 1972 Apr 8;106(7):783-6. Review. PubMed PMID: 4622757; PubMed Central PMCID: PMC1940515.

1215: Baba H, Takahashi R, Azuma Y. Rifampicin in the retreatment of severe cavitory pulmonary tuberculosis. I. Some considerations on the sputum conversion rate and the emergence of drug resistance. *Kekkaku*. 1971 Nov;46(11):429-35. Japanese. PubMed PMID: 5004056.

1216: Freiman I, Geefhuysen J. Evaluation of intrathecal therapy with streptomycin and hydrocortisone in tuberculous meningitis. *J Pediatr*. 1970 Jun;76(6):895-901. PubMed PMID: 5467641.

1217: Sehm G. [Sputum conversion and cavity closure]. *Prax Pneumol*. 1970 Jun;24(6):360-8. German. PubMed PMID: 5432551.

1218: KrzyÅ&gt;ko R, Marciniak J, Zielniewicz B. [Value of controlled ambulatory and

clinical treatment in just discovered, TbB-positive patients during the first treatment year, as the possibilities of sputum conversion]. Z Erkr Atmungsorgane Folia Bronchol. 1970;132(1):49-51. German. PubMed PMID: 5203108.

1219: Poole G, Stradling P. Intermittent chemotherapy for tuberculosis in an urban community. Br Med J. 1969 Jan 11;1(5636):82-4. PubMed PMID: 5761830; PubMed Central PMCID: PMC1981997.

1220: Vadász I. Effect of nandrolone decanoate on some forms of pulmonary tuberculosis. Arzneimittelforschung. 1969 Jan;19(1):100-3. PubMed PMID: 5819351.

1221: Kent DC, Reid D, Sokolowski JW, Houk VN. Tuberculin conversion. The iceberg of tuberculous pathogenesis. Arch Environ Health. 1967 Apr;14(4):580-4. PubMed PMID: 4960792.

1222: Eule, Ewert. [The significance of persistent cavities after achieved sputum conversion]. Z Tuberk Erkr Thoraxorg. 1966;125(3):168-71. German. PubMed PMID: 6014517.

1223: Eule H, Ewert EG. [Significance of rest caverns after sputum conversion]. Beitr Klin Erforsch Tuberk Lungenkr. 1966;133(5):323-35. German. PubMed PMID: 5973714.

1224: HSU KH, JEU F, JENKINS DE. STUDIES ON THE SPECIFIC TUBERCULIN REACTION. TUBERCULIN CONVERSION IN TUBERCULOSIS CONTACTS. Am Rev Respir Dis. 1964 Jul;90:36-47. PubMed PMID: 14178625.

1225: NOVAK M, JANCIK E. SPUTUM CONVERSION IN CHRONIC TUBERCULOSIS WITH POLYRESISTANT BACILLI. Acta Tuberc Pneumol Scand. 1964;45:301-19. PubMed PMID: 14234473.

1226: SULA L, LANGEROVA M. DRUG SENSITIVITY-RESISTANCE DETERMINATION AND SIMPLE ENZYMIC TESTS FOR THE DIFFERENTIATION OF MYCOBACTERIA. Bull World Health Organ. 1963;29:579-88. PubMed PMID: 14102035; PubMed Central PMCID: PMC2555064.

1227: STRANDGAARD E. Sputum conversion on chemotherapy in fresh cases of pulmonary tuberculosis. Acta Tuberc Pneumol Scand. 1962;41:187-91. PubMed PMID: 13917617.

1228: SELKON JB, FOX W, GANGADHARAM PR, RAMACHANDRAN K, RAMAKRISHNAN CV, VELU S. Rate of inactivation of isoniazid in South Indian patients with pulmonary tuberculosis. 2. Clinical implications in the treatment of pulmonary tuberculosis with isoniazid either alone or in combination with PAS. Bull World Health Organ. 1961;25:779-92. PubMed PMID: 13910443; PubMed Central PMCID: PMC2555638.

1229: BARBER LM, SAMSON PC, DUGAN D. Primary pulmonary resection for tuberculosis; medical and economic aspects in a small sanatorium. Calif Med. 1953 Apr;78(4):282-4. PubMed PMID: 13042660; PubMed Central PMCID: PMC1521819.
